# Supplementary material for: A Metagenomic Analysis of Mosquito Virome Collected From Different Animal Farms at Yunnan–Myanmar Border of China
Source: Frontiers journal article supplement (doi:10.3389/fmicb.2020.591478), 2021-02-08
Supplement: Table_4.XLS [file Table_4.XLS]

## Sheet: heatmap
Supplementary Table 4. Percentage of reads related to specific viruses
Taxon	Sample
	B3	C1	C2	C3	D2	E1	F1	G1	G2	G3
Hubei mosquito virus 2	0.0342982	0.713953	0.245332	0.457563	0.227571	0.241259	0.203951	0.94389	0.277778	0.154959
Circovirus sp.	0.854449	0.00226357	0.637166	0.388073	0.581139	0.00517045	0.1895	0.00323337	0.510032	0.724755
Bark beetle-associated genomovirus 6	0.000299424	0.112978	0.00141062	0.0205429	0.0117848	0.00282421	0.0159882	0.00144332	0.0244876	0.00593741
Culex circovirus-like virus	0.054721	0.000264771	0.000506535	0.00727753	0.00294105	0.69499	0.00514698	0.000431914	0.00744337	0.00182917
Human alphaherpesvirus 1	0.000312749	0.000335897	0.0111972	0.00832156	0.00224584	0.00588657	0.00254092	0.000161162	0.000970874	0.00131687
Hubei arthropod virus 1	0.000192039	0.0838795	0.00094797	0.0118836	0.00788249	0.00219195	0.00874335	0.000860375	0.0137001	0.00304259
uncultured circovirus	0.0197275	0.000234073	0.0545415	0.0177793	0.0847834	0.000888855	0.0407068	0.00021872	0.0271845	0.0120669
Japanese encephalitis virus	9.406e-06	4.09764e-05	0.000143366	0.013204	0.004233	0.000397469	0.00866517	0.000166457	0.0313916	0.0010952
Yongsan sobemo-like virus 1	0.000261408	0.00508684	0.00418211	0.0107474	0.00590415	0.00258103	0.0089779	0.0434175	0.0162891	0.00471249
Wenzhou sobemo-like virus 3	0.000876718	0.0137105	0.00102916	0.00331634	0.00191808	0.00854978	0.0895575	0.000440893	0.00355987	0.00144494
Pseudomonas phage PPpW-4	2.90018e-05	0.000221191	0.000179573	0.00500522	0.00821613	6.54063e-05	0.0513395	0.000396689	0.0012945	0.00181439
Hubei sobemo-like virus 41	3.84078e-05	8.45567e-05	0.000224192	0.00297857	0.00251922	0.000184479	0.00340092	0.000222864	0.00366775	0.0691225
uncultured virus	2.3515e-05	0.00515878	6.29054e-05	0.00107474	0.00056146	0.00010901	0.00338789	5.18021e-05	0.00161812	0.000203606
Culex Bunya-like virus	0.00189531	0.0236747	0.000598333	0.00307069	0.00147714	0.00256258	0.00152455	0.000112353	0.00248112	0.000298841
Diaphorina citri densovirus	0.0237831	0.000438818	0.0323239	0.0071547	0.0046416	0.000122427	0.00162879	7.04508e-05	0.000970874	0.000463039
Pseudomonas phage phi15	1.09737e-05	6.68779e-05	3.84015e-05	0.00389977	0.00263386	2.0125e-05	0.0124179	0.000101993	0.00194175	0.000820991
Hepacivirus C	1.17575e-06	1.2334e-06	1.82864e-05	3.07069e-05	2.05771e-05	1.67708e-06	1.30303e-05	1.38139e-06	0	1.64198e-06
Pseudomonas phage POR1	3.91917e-06	1.76788e-05	2.37724e-05	0.000552724	0.0242383	3.52188e-05	0.0287319	2.39441e-05	0.000107875	0.000239729
Wenzhou sobemo-like virus 4	4.85977e-05	0.000858176	0.000184327	0.000644844	0.000377736	0.000164354	0.0422704	0.0014995	0.00151025	0.000241371
Culex luteo-like virus	3.91917e-07	1.64454e-05	1.09719e-06	0	1.17583e-05	1.67708e-06	0.000325758	2.99301e-06	0.00021575	0.000384224
Hubei macula-like virus 3	5.44764e-05	0.00602847	0.000125079	0.00254867	0.00115673	0.000397469	0.00118576	0.000156557	0.00194175	0.000967128
Culex mosquito virus 6	0.00010425	0.0028996	2.66982e-05	0.000337776	0.000236636	7.21146e-05	0.00633274	4.12114e-05	0.000755124	9.85189e-05
Wuhan house centipede virus 8	0	5.4818e-07	3.29156e-06	0	2.93958e-05	6.70834e-06	0.0532419	0.000150111	0.00021575	0.00113461
Beihai picorna-like virus 77	0.000129724	0.00224192	0.00207661	0.00119757	0.000604084	0.000155969	0.000964245	0.000141823	0.0197411	0.000203606
Culex-associated Luteo-like virus	0.000110129	0.00162563	0.0002209	0.000429896	0.000285139	0.000471261	0.0136819	8.67972e-05	0.000323625	9.3593e-05
Pseudomonas phage phiIBB-PF7A	7.83833e-07	1.06895e-05	4.75448e-06	0.00168888	0.00125226	8.38542e-06	0.00431304	3.59161e-05	0.000539374	0.000257791
Pseudomonas phage UNO-SLW1	1.56767e-06	4.5636e-05	2.63325e-05	0.00128969	0.00200773	6.70834e-06	0.00891275	6.37741e-05	0.000323625	0.000325112
Enterobacter phage phiEap-2	0	0	0	0	0	0	0	0	0	0
Bat sobemovirus	0.000253178	0.00179543	0.000584801	0.000706258	0.000313065	0.00179951	0.0169003	7.1602e-05	0.000970874	0.000144494
Human associated gemykibivirus 1	2.78261e-05	0.00637547	5.6688e-05	0.00113615	0.000777519	0.000114042	0.000703638	8.67972e-05	0.000862999	0.000251223
Hubei partiti-like virus 39	3.91917e-07	9.59315e-07	6.58312e-06	9.21206e-05	2.05771e-05	2.34792e-05	0.0218128	0.000165076	0	0.00162228
Streptomyces phage LibertyBell	0	1.50749e-06	3.65729e-07	6.14137e-05	0.000249864	1.67708e-06	0.0220473	9.20926e-07	0	6.56793e-06
uncultured Mediterranean phage uvMED	1.13656e-05	1.5349e-05	9.50895e-06	0.00147393	0.000615842	7.21146e-05	0.00430001	2.37138e-05	0.000539374	8.53831e-05
Bombus-associated virus Den1	0.00494207	0.000160069	0.00355379	0.000552724	0.00201949	1.67708e-06	0.000208485	3.22324e-06	0.000107875	1.31359e-05
Porcine parvovirus 6	0	4.11135e-07	1.09719e-06	0	2.05771e-05	1.67708e-06	0	1.61162e-06	0	0
Macaca mulatta polyomavirus 1	3.91917e-07	2.7409e-07	1.09719e-06	0	2.93958e-06	6.70834e-06	1.30303e-05	2.30231e-07	0	0
Porcine parvovirus 2	3.91917e-07	5.07066e-06	7.31458e-06	0.000245655	0.000121993	0.00659597	0.000247576	1.40441e-05	0.000323625	5.91114e-05
Pseudomonas phage PFP1	1.17575e-06	3.20685e-05	5.48593e-06	0.000522017	0.000834841	3.68959e-05	0.0045085	3.33836e-05	0.00021575	0.00014121
Microbacterium phage Camille	0	5.4818e-06	1.24348e-05	0.000245655	0.000220469	0	0.0135776	1.84185e-06	0	2.79137e-05
Golden hamster intracisternal A-particle H18	0	0	0	0	0	0	0	0	0	0
Culex mosquito virus 3	0.000100723	0.00174719	2.01151e-05	0.00049131	0.000194012	6.20521e-05	0.00581153	2.64766e-05	0.000323625	7.55312e-05
Bat luteovirus	8.58297e-05	0.00038263	0.000172624	0.000214948	0.000102885	0.00182802	0.00486031	2.4865e-05	0.000323625	8.37411e-05
Spleen focus-forming virus	7.83833e-07	1.75418e-05	3.29156e-06	9.21206e-05	0.000218999	0.000162677	0.0028797	9.89995e-06	0.000107875	3.61236e-05
Rhodococcus virus Pepy6	3.91917e-07	4.11135e-07	3.65729e-07	3.07069e-05	0.000291019	0	0.0119749	1.15116e-06	0.000107875	3.28396e-06
dsRuc_viral virus environmental sample	0	6.23555e-05	1.82864e-06	0	0.000154328	6.70834e-06	2.60607e-05	1.68069e-05	0	1.64198e-06
Yongsan picorna-like virus 2	2.31231e-05	3.38501e-05	1.31662e-05	0.000337776	0.000129342	0.00814895	0.000286667	1.95697e-05	0	0.000103445
Tomato matilda virus	3.52725e-06	0.000532831	6.21739e-06	0.000214948	5.43823e-05	3.35417e-06	1.30303e-05	6.67671e-06	0.000323625	1.64198e-05
Pseudomonas phage Phi-S1	7.83833e-07	1.35675e-05	1.42634e-05	0.000122827	0.000474742	1.67708e-06	0.00269728	4.39742e-05	0.000431499	0.000169124
Pantoea virus Limelight	3.91917e-07	9.59315e-07	2.19437e-06	3.07069e-05	1.17583e-05	5.03125e-06	2.60607e-05	2.53255e-06	0	1.64198e-05
Mosquito circovirus	0.000565536	2.7409e-06	0.000100941	3.07069e-05	8.23083e-05	0.006601	0.000143334	4.14417e-06	0.000107875	2.79137e-05
Salmonella virus VSiP	0	0	3.65729e-07	3.07069e-05	7.34895e-06	0	0	0	0	1.64198e-06
Wuhan Mosquito Virus 9	3.91917e-05	0.000717704	0.000271737	0.000245655	0.000133751	0.000716115	0.000364849	3.20022e-05	0.000323625	7.38892e-05
Ungulate erythroparvovirus 1	1.95958e-06	0.000300814	4.82762e-05	0.00101333	0.000321884	3.35417e-06	2.60607e-05	1.24325e-05	0.00021575	2.13458e-05
Pseudomonas phage PspYZU08	7.83833e-07	4.38544e-06	8.7775e-06	0.000337776	0.000803975	1.67708e-06	0.000677577	9.20926e-06	0	5.25434e-05
Sacbrood virus	3.91917e-06	0.000659597	7.68031e-06	3.07069e-05	7.49593e-05	1.17396e-05	6.51517e-05	8.97902e-06	0.000107875	1.64198e-05
Hubei picorna-like virus 61	1.56767e-06	4.38544e-06	3.65729e-06	6.14137e-05	4.85031e-05	6.70834e-06	0.000117273	0.00019938	0.00528587	0.000147778
uncultured Mediterranean phage	3.91917e-07	5.4818e-07	0	0	6.76104e-05	0	0.00254092	2.30231e-07	0	1.64198e-06
Hubei picorna-like virus 42	5.87875e-06	0.00356454	1.97494e-05	0.000214948	0.000223408	1.00625e-05	0.000169394	1.33534e-05	0	2.13458e-05
Parvovirinae sp.	0.000555738	2.60385e-06	0.000478374	6.14137e-05	0.000189603	0	1.30303e-05	2.30231e-07	0	3.28396e-06
Shuangao partiti-like virus 1	3.91917e-06	1.50749e-06	3.65729e-07	0	8.81874e-06	0	6.51517e-05	1.65767e-05	0.00733549	2.29878e-05
Microbacterium phage Count	0	1.37045e-07	1.46292e-06	0	0.000363038	3.35417e-06	0.00703638	4.60463e-07	0	3.28396e-06
Serratia phage Eta	3.91917e-07	0	0	0	0	0	0	0	0	0
Acinetobacter phage vB_AbaM_B9	0	0	0	0	0	0	0	0	0	0
Hubei partiti-like virus 31	0	3.9743e-06	7.31458e-07	3.07069e-05	1.17583e-05	0	0	1.61162e-06	0.00711974	0.000144494
Microviridae sp.	1.56767e-05	7.40043e-06	2.01151e-05	9.21206e-05	7.93687e-05	0.000291813	0.000651517	3.91393e-06	0.000431499	2.79137e-05
Dickeya phage phiDP23.1	3.91917e-07	1.78158e-06	3.65729e-06	0.000153534	2.49864e-05	1.17396e-05	0.000469092	2.96999e-05	0.00118662	3.77656e-05
Hymenopteran ambidensovirus 1	3.91917e-07	2.05567e-06	2.19437e-06	0.000153534	3.96843e-05	3.35417e-06	0.00106849	2.62464e-05	0	0.000333322
Medway virus	0	0	0	0	2.93958e-06	1.67708e-06	0	6.90694e-07	0.000107875	1.64198e-06
Hubei picorna-like virus 39	0	1.50749e-06	3.65729e-07	0	5.87916e-06	0	1.30303e-05	1.61162e-06	0.00021575	0
Wuchan romanomermis nematode virus 3	5.48683e-06	8.59272e-05	3.65729e-07	0	1.02885e-05	0	0.000495153	6.90694e-07	0.000431499	1.64198e-06
Pseudomonas phage Pf-10	7.83833e-07	1.41156e-05	3.65729e-06	3.07069e-05	0.000257213	8.38542e-06	0.00185031	4.46649e-05	0.000107875	5.41854e-05
Darwin bee virus 2	2.3515e-06	0.000624377	5.85166e-06	3.07069e-05	7.93687e-05	3.35417e-06	6.51517e-05	1.2893e-05	0.000107875	4.92595e-06
Ungulate copiparvovirus 1	6.27067e-06	2.78201e-05	1.02404e-05	0.00558865	3.96843e-05	1.67708e-06	0	3.6837e-06	0	3.28396e-06
Freshwater phage uvFW-CGR-AMD-COM-C449	0	8.2227e-07	3.65729e-07	0	1.17583e-05	0	0.00534244	4.3744e-06	0	4.92595e-06
Hubei chryso-like virus 1	0.000305303	0.000184874	0.000194202	0.000245655	9.25968e-05	0.000159323	0.000130303	1.2893e-05	0.000323625	2.13458e-05
Streptomyces phage HotFries	0	0	3.65729e-07	0	2.93958e-06	0	0.00523819	2.30231e-07	0	1.64198e-06
Chaq virus	7.83833e-07	5.4818e-07	2.19437e-06	0	3.23354e-05	1.67708e-06	3.9091e-05	2.76278e-06	0	0.000607533
Galbut virus	7.83833e-07	1.64454e-06	4.75448e-06	6.14137e-05	9.70062e-05	6.70834e-06	2.60607e-05	3.91393e-06	0	0.00169945
Dicistroviridae SC2803	3.91917e-07	4.11135e-07	0	0	0	0	0	0	0.00474649	0
Microbacterium phage ValentiniPuff	7.83833e-07	4.11135e-07	3.65729e-07	0	4.40937e-06	0	0.00462577	6.90694e-07	0	3.28396e-06
Xinzhou Mosquito Virus	7.13288e-05	0.000916283	1.71893e-05	0.000153534	8.96572e-05	0.000127458	3.9091e-05	1.05906e-05	0.000107875	1.31359e-05
Streptomyces phage Madamato	0	1.37045e-07	0	0	1.17583e-05	0	0.00458668	0	0	3.28396e-06
Hubei picorna-like virus 41	5.48683e-06	0.00116447	1.3532e-05	0.000122827	7.93687e-05	1.84479e-05	9.12123e-05	1.51953e-05	0.00021575	4.10496e-05
BeAn 58058 virus	0	1.64454e-06	2.26752e-05	3.07069e-05	3.38052e-05	0	0.000169394	1.05906e-05	0.000107875	6.56793e-06
Marine gokushovirus	0	0	0	0	0	0	0	0	0	0
Hubei mosquito virus 3	2.74342e-06	2.46681e-06	5.12021e-06	3.07069e-05	9.99458e-05	8.38542e-06	7.8182e-05	6.44648e-06	0.000323625	0.00159436
Wuhan Mosquito Virus 8	0.000268855	0.000617251	1.3532e-05	0.000184241	9.25968e-05	2.0125e-05	0.000169394	2.14115e-05	0.000107875	4.26915e-05
Siphoviridae sp.	0	9.59315e-07	7.31458e-07	6.14137e-05	0.001192	1.67708e-06	6.51517e-05	2.30231e-07	0	4.92595e-06
Synechococcus phage S-CBP1	0	8.2227e-07	0	3.07069e-05	7.34895e-06	5.03125e-06	0.0033097	6.90694e-07	0	4.92595e-06
Human endogenous retrovirus H	0	0	2.19437e-06	6.14137e-05	1.46979e-06	1.50938e-05	0.000573335	4.3744e-06	0.00021575	0
Duck astrovirus CPH	5.48683e-06	1.37045e-07	1.82864e-06	3.07069e-05	5.87916e-06	1.67708e-06	2.60607e-05	2.76278e-06	0.00248112	1.80618e-05
Hubei tetragnatha maxillosa virus 8	3.91917e-07	2.05567e-06	2.5601e-06	0	5.5852e-05	1.67708e-06	1.30303e-05	1.61162e-06	0	0.00103937
Totivirus-like Culex mosquito virus 1	0	5.4818e-07	0	3.07069e-05	1.61677e-05	0	0	1.38139e-06	0	3.77656e-05
Bat feces associated picorna-like virus SC3066	3.91917e-07	0.000163769	3.65729e-07	3.07069e-05	7.34895e-06	0	0	1.61162e-06	0	3.28396e-06
Yongsan iflavirus 1	7.83833e-07	1.37045e-07	7.31458e-07	6.14137e-05	1.02885e-05	3.35417e-06	1.30303e-05	3.6837e-06	0	0.000106729
Agrobacterium phage Atu_ph07	3.91917e-07	8.2227e-07	3.65729e-07	0.0027022	0.000343931	0	1.30303e-05	4.60463e-07	0	1.14939e-05
Salmonella virus SP101	0	0	0	0	0	0	0	0	0	0
Pseudomonas phage ZC01	0	0	0	0	0	0	0	0	0	0
Pseudomonas phage JG012	0	0	0	0	0	0	0	0	0	0
Ambidensovirus sp.	3.91917e-07	3.9743e-06	1.09719e-06	0	2.05771e-05	0	0.000260607	0.000743187	0.00107875	3.28396e-06
Hubei sobemo-like virus 40	0	3.15203e-06	3.65729e-07	0	0	0	0	2.30231e-07	0	0
Myoviridae environmental samples	0	5.4818e-07	0	3.07069e-05	1.02885e-05	1.67708e-06	0.00121182	4.60463e-07	0	0
Hubei partiti-like virus 33	0	4.11135e-07	0	6.14137e-05	4.40937e-06	1.84479e-05	0.00208485	2.39441e-05	0	0.000395718
Hubei sobemo-like virus 49	0	0	0	0	0	0	0	0	0	8.20991e-06
Hubei picorna-like virus 37	1.95958e-06	0.000551606	4.38875e-06	6.14137e-05	8.08385e-05	5.03125e-06	2.60607e-05	5.52555e-06	0	1.31359e-05
Human betaherpesvirus 6A	0	1.37045e-06	8.04604e-06	3.07069e-05	0	0	2.60607e-05	7.59764e-06	0.000107875	2.46297e-05
Pandoravirus salinus	0	5.4818e-07	0	3.07069e-05	4.40937e-05	0	0	2.30231e-07	0	0
Pseudomonas phage shl2	0	1.09636e-06	7.31458e-07	6.14137e-05	4.26239e-05	0	6.51517e-05	6.90694e-07	0	4.92595e-06
Boghill Burn virus	3.52725e-06	2.05567e-06	0.000513484	3.07069e-05	2.05771e-05	5.03125e-06	9.12123e-05	2.99301e-06	0	2.29878e-05
Ralstonia virus phiAp1	0	0	0	0	0	0	0.00230637	0	0	0
Australian Anopheles totivirus	0	2.7409e-07	3.65729e-07	3.07069e-05	8.81874e-06	0	1.30303e-05	0	0	4.76175e-05
Bosavirus MS-2016a	1.80282e-05	5.15289e-05	3.65729e-06	0.0013204	1.46979e-05	0	5.21213e-05	5.29532e-06	0	0
Puniceispirillum phage HMO-2011	0	0	0	0	4.40937e-06	0	0	0	0	0
Culex Hubei-like virus	0	2.7409e-07	7.31458e-07	0	8.81874e-06	0.000233115	2.60607e-05	4.60463e-07	0	8.20991e-06
Pseudomonas phage Henninger	0	4.11135e-07	3.65729e-07	0	3.82146e-05	0	0.000169394	1.15116e-06	0	3.28396e-05
Alphaproteobacteria virus phiJl001	0	2.7409e-07	1.09719e-06	0	4.40937e-06	0	7.8182e-05	6.90694e-07	0	0
Hubei tombus-like virus 27	0	0	3.65729e-07	0	0	0	0.000508183	6.90694e-07	0.0012945	0
Hubei virga-like virus 2	0	0	1.09719e-06	0	1.46979e-06	0	0	0	0	0
Synechococcus phage S-CBS4	0	2.7409e-07	3.87673e-05	3.07069e-05	1.32281e-05	0	0.000117273	2.76278e-06	0	0
Bundaberg bee virus 4	0	7.48266e-05	3.65729e-07	3.07069e-05	8.81874e-06	0	0	1.38139e-06	0	8.20991e-06
Klebsiella phage SopranoGao	0	0	0	0	1.61677e-05	0	0	0	0	6.56793e-06
Pestivirus C	7.83833e-07	8.2227e-07	3.1087e-05	6.14137e-05	5.73218e-05	4.36042e-05	0.00105546	4.83486e-06	0	2.79137e-05
Escherichia phage VB_EcoS-Golestan	0	0	0	0	0	0	0.000234546	0	0	0
Torque teno sus virus 1a	2.74342e-06	0	7.31458e-07	0	1.46979e-06	0.000221375	0.000430001	1.84185e-06	0	3.28396e-06
Freshwater phage uvFW-CGR-AMDFOS-S50-C341	0	1.2334e-06	0	3.07069e-05	0	0	6.51517e-05	9.20926e-07	0	0
Partitivirus-like 5	8.4654e-05	2.7409e-06	0	3.07069e-05	0	0	0	0	0	0
Anelloviridae sp.	1.45009e-05	0	0	0	0	1.67708e-06	0.000873032	6.90694e-07	0	0
Apis mellifera associated microvirus 13	0	0	0	0	0	0	0	0	0.000107875	0
Escherichia phage vB_EcoS_ESCO41	3.91917e-07	2.7409e-07	0	3.07069e-05	7.34895e-06	0	0	4.60463e-07	0	2.13458e-05
Podoviridae sp.	0	1.50749e-06	0	3.07069e-05	1.32281e-05	5.03125e-06	1.30303e-05	0	0	4.92595e-06
Xanthomonas phage Xp15	0	1.37045e-07	0	0	0.000110234	0	0.00136819	0	0	0
Acinetobacter phage Acj61	0	1.37045e-07	0	0	1.17583e-05	0	0	0	0	0
Twyford virus	0	1.78158e-06	0	0	0	0	0	0	0.000107875	0
Pseudomonas virus PAKP1	0	0	0	0	4.40937e-06	0	0	0	0	1.64198e-06
Culex Bunyavirus 2	0	1.50749e-06	0	0	0	1.67708e-06	0	0	0	0
Bemisia-associated genomovirus NfO	3.91917e-07	1.50749e-06	0	0	0	0	0	0	0	0
Klebsiella phage MezzoGao	0	1.37045e-07	0	0	0	0	0	0	0	0
uncultured phage MedDCM-OCT-S04-C348	0	1.37045e-07	0	0	0	0	0	0	0	0
Thalassomonas phage BA3	0	0	0	0	0	0	0	0	0	0
Salmonella phage SP3	0	0	0	0	0	0	0	0	0	0
Gokushovirinae Bog5712_52	0	0	0	0	0	0	0	0	0	0
Thermus virus IN93	0	5.4818e-07	0	9.21206e-05	0.000261623	1.67708e-06	5.21213e-05	2.07208e-06	0	3.61236e-05
Shangao tombus-like virus 1	0	1.2334e-06	0	0	1.46979e-06	0	7.8182e-05	1.84185e-06	0.00107875	1.31359e-05
Gemycircularvirus HV-GcV1	3.91917e-07	0.000359743	3.29156e-06	9.21206e-05	2.64562e-05	6.70834e-06	2.60607e-05	3.6837e-06	0	8.20991e-06
Bunyaviridae environmental sample	4.703e-06	0.000135263	5.12021e-06	0	3.08656e-05	1.50938e-05	6.51517e-05	3.45347e-06	0	6.56793e-06
Hubei permutotetra-like virus 1	2.74342e-06	2.35717e-05	7.31458e-07	0	1.02885e-05	8.38542e-06	0.000234546	2.94696e-05	0.000647249	5.41854e-05
Culex mosquito virus 4	0	4.24839e-06	1.46292e-06	0	2.64562e-05	0	1.30303e-05	1.38139e-06	0	0.000387508
Mycobacterium phage HINdeR	0	0	0	0	1.46979e-06	1.67708e-06	0.00117273	0	0	0
Basavirus sp.	1.95958e-06	0.000112925	5.48593e-06	0.000184241	3.23354e-05	1.67708e-06	0	6.90694e-06	0.000107875	4.92595e-06
Thermus phage phiLo	0	2.7409e-07	3.65729e-07	0	2.64562e-05	0	0.000104243	6.90694e-07	0	4.92595e-06
Wuhan insect virus 22	7.83833e-07	1.37045e-06	1.09719e-06	0	3.23354e-05	1.67708e-06	0	1.15116e-06	0	0.000216742
Synechococcus phage S-CBS3	0	0	0	0.000214948	4.26239e-05	0	0.000846972	2.30231e-07	0	0
Escherichia phage IMM-002	0	3.83726e-06	7.31458e-07	3.07069e-05	3.82146e-05	0	0.000638486	6.90694e-07	0	3.28396e-06
Erwinia phage phiAT1	2.74342e-06	4.11135e-07	8.7775e-06	0	1.17583e-05	3.35417e-06	0.00106849	2.30231e-07	0	3.28396e-06
Picorna-like virus Eptesicus fuscus/P5/InLV/IT/USA/2009	3.91917e-07	0.000224206	2.92583e-06	0	2.05771e-05	6.70834e-06	2.60607e-05	4.3744e-06	0	3.28396e-06
Pseudomonas phage Psp6	0	1.37045e-07	0	0	0	0	0	0	0	1.64198e-06
Hubei partiti-like virus 21	0	0	0	0	2.93958e-06	0	1.30303e-05	6.90694e-07	0	3.61236e-05
Darwin bee virus 4	0	4.30321e-05	0	0	4.40937e-06	0	0	1.15116e-06	0	1.64198e-06
Wuhan insect virus 24	0	1.37045e-06	0	6.14137e-05	0.000120523	0.000286781	0.000456062	4.14417e-06	0	2.46297e-05
Salmonella phage S113	0	0	0	0	0.000592326	0	0.00037788	0	0	0
Bat bunyavirus JTM	1.17575e-06	0.000128274	1.82864e-06	3.07069e-05	2.7926e-05	0	1.30303e-05	2.53255e-06	0	1.64198e-06
Human immunodeficiency virus 1	0	3.56317e-06	3.65729e-07	0.000214948	4.70333e-05	0	3.9091e-05	1.84185e-06	0	0
Aedes aegypti Thai densovirus	1.95958e-06	5.4818e-07	7.31458e-07	3.07069e-05	1.91073e-05	1.67708e-06	0.000156364	0.000225397	0.00021575	9.5235e-05
Hubei tick virus 3	0	4.11135e-07	0	0	1.46979e-06	0	0	2.30231e-07	0	1.64198e-06
Goose picornavirus 1	0	0	7.31458e-07	0	1.46979e-06	4.36042e-05	0	3.45347e-06	0	4.92595e-06
Taterapox virus	3.68402e-05	1.37045e-07	1.17033e-05	0	0	0	0	1.51953e-05	0.000539374	1.64198e-06
Lepus americanus faeces associated genomovirus SHP111	0	1.37045e-07	3.65729e-07	0	0	0	0.000860002	0	0	0
Xanthomonas phage XacN1	0	1.37045e-07	3.65729e-07	0.000184241	2.49864e-05	0	0	0	0	0
Ek Balam virus	0	8.63383e-06	0	0	4.40937e-06	1.67708e-06	2.60607e-05	0	0	0
Lygus lineolaris virus 1	0	1.58972e-05	3.65729e-07	0	2.93958e-06	0	1.30303e-05	2.30231e-07	0	0
Hubei permutotetra-like virus 2	3.91917e-06	2.64497e-05	1.09719e-06	0	1.02885e-05	0.000181125	0	4.83486e-06	0.000107875	1.47778e-05
uncultured marine virus	1.09737e-05	6.85225e-07	6.21739e-06	0	2.49864e-05	5.53438e-05	0.000338789	4.60463e-07	0	1.64198e-06
Tongilchon virus 1	7.83833e-07	2.16531e-05	0.000105696	3.07069e-05	7.34895e-06	0	2.60607e-05	1.84185e-06	0	8.20991e-06
Hubei picorna-like virus 38	3.91917e-07	4.11135e-06	4.02302e-06	3.07069e-05	2.93958e-06	0.000607104	0	2.30231e-07	0	1.64198e-06
Mycobacterium phage Lolly9	0	1.37045e-07	3.65729e-07	0	0	0	1.30303e-05	1.15116e-06	0	0
Staphylococcus phage P1105	3.72321e-05	0.000134989	3.29156e-06	0	1.46979e-05	3.35417e-06	0.000234546	2.30231e-06	0	6.56793e-06
Termite associated circular virus 3	0	0	0	0	0	0	0	4.60463e-07	0	0
Propionibacterium virus PHL114L00	0	0	0	0	2.93958e-06	0	0	2.30231e-07	0	0
Synechococcus phage ACG-2014f	0	1.37045e-07	0	6.14137e-05	1.46979e-06	0	5.21213e-05	0	0	0
Circovirus-like genome DCCV-8	0	0	0	0	0	0	0	2.30231e-07	0	0
Methylophilaceae phage P19250A	0	5.4818e-07	3.65729e-07	0	2.7926e-05	0	0.000195455	0	0.00021575	1.64198e-06
Sanxia water strider virus 8	0	1.71306e-05	0	0	4.40937e-06	0	0	2.30231e-07	0	0
Cotesia sesamiae bracovirus	0	1.09636e-06	2.92583e-06	0	1.02885e-05	1.67708e-06	0	4.60463e-07	0	1.64198e-06
Streptomyces phage Scap1	0	0	0	0	2.93958e-05	0	0.000599395	0	0	0
Methylophilales phage HIM624-A	0	3.01499e-06	7.31458e-07	0	8.23083e-05	0	5.21213e-05	6.90694e-07	0.000431499	3.28396e-06
Hubei diptera virus 19	0	1.37045e-07	0	0	1.46979e-06	0	0	4.60463e-07	0.000647249	1.64198e-06
Lactococcus phage 1706	0	0	0	0	0.000436528	0	0.000156364	4.60463e-07	0	3.28396e-06
Murine leukemia virus	0	2.7409e-07	7.68031e-06	0	2.20469e-05	0	0.00037788	2.07208e-06	0	1.64198e-06
Hemipteran ambidensovirus 1	1.17575e-06	4.11135e-07	2.92583e-06	0	7.34895e-06	1.67708e-06	0.000117273	4.83486e-06	0	0.000121507
Wuhan Millipede virus 4	0	0	3.65729e-07	0	0	0	0	0	0	1.64198e-05
Enterobacteria phage vB_EcoS_NBD2	0	2.7409e-07	0	0	5.87916e-06	0	0	0	0	1.64198e-06
Odonata-associated circular virus-10	3.91917e-07	8.2227e-07	0	0	1.46979e-06	0	0.000586365	0	0	0
Hubei toti-like virus 11	3.91917e-07	7.97602e-05	7.31458e-07	3.07069e-05	8.81874e-06	1.67708e-06	0.000299698	1.24325e-05	0	9.85189e-06
Meiothermus phage MMP7	0	0	0	0	0	0	0.000573335	6.90694e-07	0	0
Streptomyces phage Bing	0	0	0	0	5.87916e-06	0	0.000560304	0	0	0
Hubei partiti-like virus 41	3.91917e-07	1.37045e-07	7.31458e-07	0	0	3.35417e-06	0.00039091	5.06509e-06	0	0.000137927
Mycobacterium phage Koko	0	0	0	0	0	0	0.000560304	0	0	0
Imjin River virus 1	1.56767e-06	6.7152e-05	1.09719e-06	6.14137e-05	8.81874e-06	0	0	4.14417e-06	0.00021575	4.92595e-06
Rhizoctonia fumigata partitivirus	0	5.71478e-05	1.46292e-06	9.21206e-05	1.61677e-05	1.67708e-06	0	2.99301e-06	0	3.28396e-06
Pseudomonas phage 22PfluR64PP	0	2.7409e-07	7.31458e-07	0	7.34895e-06	0	0.000351819	0	0	0
Pectobacterium phage Clickz_B6	0	2.7409e-07	1.64578e-05	0	2.93958e-06	0	2.60607e-05	4.60463e-07	0	0
Cronobacter phage vB_CsaM_GAP32	0	6.85225e-07	3.65729e-07	0	2.93958e-06	0	0.000104243	0	0	0
Culex Bastrovirus-like virus	0	1.2334e-06	1.82864e-06	0.000522017	1.46979e-06	0	0	0	0	0
Medicago sativa marafivirus 1	3.91917e-07	6.56445e-05	7.31458e-07	0	1.32281e-05	0	0	9.20926e-07	0.000107875	1.64198e-06
Pseudomonas virus EL	0	0	0	0.000522017	1.46979e-06	0	0	0	0	0
Beihai barnacle virus 13	0	6.85225e-07	0	3.07069e-05	1.46979e-06	1.67708e-06	0.000416971	1.26627e-05	0	3.94076e-05
Yongsan picorna-like virus 3	0.000416215	3.01499e-06	4.38875e-06	3.07069e-05	1.61677e-05	0	0	2.07208e-06	0	1.64198e-06
Erwinia phage PEp14	0	1.37045e-07	0	3.07069e-05	1.46979e-06	0	0.000469092	0	0	0
Myoviridae sp.	0	1.37045e-07	0	0.000337776	0.000164617	0	0	0	0	0
Shuangao chryso-like virus 1	0	3.28908e-06	6.94885e-06	0	1.46979e-06	3.35417e-06	0	2.30231e-07	0	3.28396e-06
Freshwater phage uvFW-CGR-AMD-COM-C455	0	1.64454e-06	3.29156e-06	3.07069e-05	8.81874e-06	0	0.000117273	0	0.000107875	1.14939e-05
Baird Spence virus	0	4.11135e-07	0	0	2.93958e-06	0	0	0	0	0
Shewanella phage SppYZU01	0	0	0	0	4.55635e-05	0	0.000182425	0	0	0
uncultured T7-like podovirus	0	2.7409e-07	3.65729e-07	0.000307069	7.34895e-06	0	0.000117273	1.38139e-06	0	0
Mycobacterium phage Samty	0	4.11135e-07	0	0	0	0	0	0	0	0
Human betaherpesvirus 5	0	1.08266e-05	2.92583e-06	9.21206e-05	2.93958e-05	0	7.8182e-05	1.15116e-06	0	6.56793e-06
Robinvale bee virus 4	7.83833e-07	0.000102784	1.09719e-06	9.21206e-05	5.87916e-06	1.67708e-06	2.60607e-05	4.60463e-07	0	1.64198e-06
Synechococcus phage Bellamy	0	2.7409e-07	3.65729e-07	6.14137e-05	1.46979e-06	0	0.000338789	0	0	0
Pseudomonas phage phiAH14b	0	1.37045e-07	0	0	1.76375e-05	0	0.000156364	2.30231e-07	0	3.28396e-06
Freshwater phage uvFW-CGR-AMD-COM-C203	0	3.15203e-06	3.29156e-06	3.07069e-05	7.34895e-06	3.35417e-06	0	4.60463e-07	0.000107875	0
Zhejiang mosquito virus 1	3.17452e-05	4.72805e-05	1.09719e-06	9.21206e-05	1.91073e-05	3.68959e-05	1.30303e-05	2.30231e-06	0	1.64198e-06
Penicillium aurantiogriseum totivirus 1	0	0	0	0	0	0	0	0	0	0
Human endogenous retrovirus W	0	1.37045e-07	5.85166e-06	0.000214948	2.05771e-05	0	1.30303e-05	2.30231e-06	0	3.28396e-06
Laodelphax striatellus iflavirus 3	0	0	0	0	0	0	1.30303e-05	0	0	0
Streptomyces phage DrGrey	0	0	0	0	0	0	0.000443031	0	0	0
Human alphaherpesvirus 2	0	5.4818e-07	8.7775e-06	0	4.40937e-06	1.67708e-06	2.60607e-05	0	0	1.64198e-06
Darwin bee virus 3	0	0	0	0	0	0	0	0	0	0
Wuhan insect virus 25	0	1.2334e-06	1.09719e-06	0	0.000299837	8.38542e-06	1.30303e-05	0	0	0
Orf virus	0	7.81156e-06	1.09719e-06	0.000153534	1.32281e-05	0	0	2.30231e-07	0	0
Hubei partiti-like virus 2	0	0	3.65729e-07	0	1.46979e-06	0	0	0	0	6.07533e-05
Anellovirus fur seal/ATROP72/BR/2012	0	1.37045e-07	0	0	0	8.38542e-06	5.21213e-05	2.30231e-07	0.000107875	0
North Creek virus	4.31108e-06	1.41156e-05	9.76496e-05	0	1.02885e-05	0	1.30303e-05	4.60463e-07	0	0
Human endogenous retrovirus	3.91917e-07	0	2.70639e-05	3.07069e-05	0	0	3.9091e-05	2.07208e-06	0	9.85189e-06
Hubei partiti-like virus 10	0	1.09636e-06	3.65729e-07	0	1.46979e-06	0	0	4.60463e-07	0	5.41854e-05
Terrestrivirus sp.	0	0	0	0	4.55635e-05	0	0	0	0.000323625	0
Apis mellifera associated microvirus 58	0	1.37045e-07	0	0	0	0	0.000208485	0	0	0
Rhodoferax phage P26218	3.91917e-07	2.7409e-07	7.68031e-06	0	8.81874e-06	0	0	0	0	2.79137e-05
uncultured Caudovirales phage	3.91917e-07	1.80899e-05	4.38875e-06	6.14137e-05	1.17583e-05	1.67708e-06	0	9.20926e-07	0	0
Cafeteria roenbergensis virus	0	0	0	0	8.81874e-06	0	0	0	0	0
Sogatella furcifera totivirus 2	0	0	0	0	0	0	0	0	0	0
Pseudomonas virus Ab26	0	0	0	0	0	0	0	0	0	0
Clostridium phage phiCTP1	0	0	0	0	0	0	0.000364849	0	0	0
Liao ning virus	0	0	0	0	0	0	0	0	0	0
Kunsagivirus A	0	0	0	0	0	0	0	0	0	0
La Jolla virus	0	2.46681e-06	3.65729e-07	0	0	0	0	0	0	0
Synechococcus phage S-CBP4	0	4.11135e-07	0	0.000307069	5.87916e-06	0	1.30303e-05	0	0	0
Synechococcus phage S-SKS1	0	1.37045e-07	3.65729e-07	3.07069e-05	5.87916e-06	0	0.000312728	0	0	1.64198e-06
Murici virus	0	0	0	0	0	0	0	0	0	0
Pandoravirus neocaledonia	0	2.7409e-07	1.46292e-06	3.07069e-05	7.34895e-06	0	1.30303e-05	0	0	0
Microbacterium phage MementoMori	0	2.7409e-07	0	0	0	0	0.000351819	0	0	0
Pseudomonas phage ZC08	0	0	0	0	1.46979e-06	0	0	0	0	1.64198e-06
Wenling partiti-like virus 2	0	2.7409e-07	0	0	0	0	1.30303e-05	0	0.000323625	8.20991e-06
Culex mosquito virus 5	1.01898e-05	8.2227e-07	1.09719e-06	0	4.40937e-06	0	0	0	0	1.97038e-05
Bacteriophage APSE-5	0	0	0	0	0	0	0	4.60463e-07	0	0
Cyanophage SS120-1	0	0	0	0	0	0	0.000338789	0	0	0
Synechococcus phage S-CBP3	0	1.91863e-06	3.65729e-07	6.14137e-05	2.35167e-05	0	0.000156364	4.60463e-07	0	1.64198e-06
Porcine type-C oncovirus	0	1.37045e-07	7.31458e-07	0	4.40937e-06	0	2.60607e-05	2.30231e-07	0	1.64198e-06
Dicistroviridae sp.	7.83833e-07	1.54861e-05	7.31458e-07	0	2.93958e-06	0	2.60607e-05	2.53255e-06	0.000107875	4.92595e-06
Penicillium citrinum ourmia-like virus 1	0	0	0	0	0	0	0	0	0	0
Spodoptera frugiperda multiple nucleopolyhedrovirus	0	1.63084e-05	0	0	1.46979e-06	1.67708e-06	2.60607e-05	0	0	1.64198e-06
Gokushovirus WZ-2015a	1.17575e-06	9.59315e-07	7.31458e-07	0	1.46979e-06	6.70834e-06	0.000104243	2.30231e-07	0	0
Wenling partiti-like virus 1	0	0	0	0	0	0	0	0	0.000323625	0
Synechococcus phage S-PM2	0	1.37045e-07	0	0	1.32281e-05	0	0.000286667	1.15116e-06	0	0
Hubei partiti-like virus 35	0	6.85225e-07	1.09719e-06	0	5.87916e-06	0.000280073	2.60607e-05	6.90694e-07	0	1.64198e-06
Mycobacterium phage WIVsmall	0	0	0	0	1.46979e-06	0	0	0	0	0
Ralstonia virus RSL2	0	0	0	0	0	0	0	0	0	0
Escherichia phage vB_EcoP_F	0	0	0	0	0	0	0	0	0	0
Hubei picorna-like virus 40	7.83833e-07	4.48137e-05	3.65729e-07	0	2.93958e-06	0	0	0	0	0
Synechococcus phage S-CBM2	0	0	0	0.000122827	2.64562e-05	0	3.9091e-05	1.15116e-06	0	0
Hubei sobemo-like virus 48	0	2.7409e-07	0	0	0	0	0	1.38139e-06	0.000107875	1.14939e-05
Escherichia virus SSL2009a	0	1.37045e-07	0	3.07069e-05	4.40937e-06	2.18021e-05	0	0	0	0
Pseudomonas phage Lu11	0	0	0	0.000214948	2.93958e-06	0	1.30303e-05	0	0	0
Odonata-associated circular virus-19	0	0	0	0	0	0	0	0	0	0
Acanthamoeba polyphaga mimivirus	0	1.37045e-07	0	0.000245655	4.40937e-06	0	1.30303e-05	0	0	3.28396e-06
EBPR siphovirus 1	0	1.37045e-07	0	0	0	0	1.30303e-05	0	0	3.28396e-06
Porcine reproductive and respiratory syndrome virus	0	2.7409e-07	3.65729e-07	0	1.76375e-05	0	0.000234546	2.30231e-07	0	3.28396e-06
Paramecium bursaria Chlorella virus A1	0	0	3.65729e-07	3.07069e-05	2.05771e-05	0	0	0	0	0
Pseudomonas phage PPPL-1	0	2.7409e-07	3.65729e-07	3.07069e-05	2.93958e-05	0	7.8182e-05	9.20926e-07	0	3.28396e-06
Bundaberg bee virus 1	7.83833e-07	3.02869e-05	3.65729e-06	6.14137e-05	5.87916e-06	5.19896e-05	2.60607e-05	1.38139e-06	0	9.85189e-06
Hubei mosquito virus 4	0	4.11135e-07	3.65729e-07	3.07069e-05	1.46979e-06	0.000176094	0	9.20926e-07	0	0
Cyanophage KBS-S-2A	0	1.37045e-07	0	0	7.34895e-06	0	0.000234546	2.30231e-07	0	0
Norway partiti-like virus 1	7.83833e-07	2.19272e-06	2.1578e-05	0	1.17583e-05	0	0	6.90694e-07	0	1.64198e-06
Carnivore protoparvovirus 1	0	0	0	0	0	0	0	0	0	0
Pandoravirus inopinatum	0	8.2227e-07	3.65729e-07	0	2.93958e-06	0	0	2.30231e-07	0	1.64198e-06
Curvibacter phage P26059A	0	0	0	0	0	0	1.30303e-05	0	0	0
Aphanizomenon phage vB_AphaS-CL131	0	0	0	0	1.46979e-06	0	0.000260607	0	0	0
Hyperionvirus sp.	0	1.37045e-07	0	0.000214948	1.02885e-05	0	0	0	0	0
Mesorhizobium phage vB_MloP_Lo5R7ANS	0	0	0	0	0	0	0.000260607	0	0	0
Avon-Heathcote Estuary associated circular virus 17	0	0	0	0	0	0	0.000260607	0	0	0
Rhodococcus phage ChewyVIII	0	0	0	0	0	0	0	0	0	1.64198e-06
Ceratobasidium partitivirus	0	2.46681e-06	0	0	0	0	1.30303e-05	0	0	0
Hubei partiti-like virus 11	0	1.37045e-07	0	0	5.87916e-06	0.000229761	1.30303e-05	0	0	1.14939e-05
Elderberry aureusvirus 1	0	0	0	0	0	0	0	2.30231e-07	0	1.64198e-06
Hubei virga-like virus 1	3.91917e-05	5.4818e-07	0	0	4.40937e-05	8.21771e-05	1.30303e-05	9.20926e-07	0	1.64198e-06
Freshwater phage uvFW-CGR-AMD-COM-C493	0	8.2227e-07	3.65729e-07	0	1.91073e-05	0	2.60607e-05	2.07208e-06	0.000107875	1.64198e-06
Hubei picorna-like virus 36	0	2.7409e-07	0	0	0	0	0	0	0	0
Shahe isopoda virus 5	0	9.73019e-06	0	0	2.93958e-06	0	0	0	0	0
Wenzhou noda-like virus 7	1.17575e-06	9.04497e-06	0	0	0	0	0	0	0	0
Brevibacterium phage Cantare	0	0	0	0	0	0	0	0	0	1.64198e-06
Megavirus chiliensis	0	2.7409e-07	3.65729e-07	3.07069e-05	1.46979e-06	0	0	0	0	0
Recombinant vesicular stomatitis Indiana virus rVSV-G/GFP	0	0	0	0	0	0	0	0	0	0
Pseudomonas phage 67PfluR64PP	0	1.09636e-06	0	3.07069e-05	4.40937e-05	0	1.30303e-05	4.60463e-07	0	9.85189e-06
Escherichia virus HK578	0	0	0	0.000122827	0	0	0	0	0	1.64198e-06
Carnivore bocaparvovirus 1	1.4109e-05	4.93362e-06	3.36471e-05	0	1.46979e-06	0	1.30303e-05	2.30231e-07	0	1.64198e-06
Lobeira virus	0	2.7409e-07	0	0	0	0	0	0	0	0
Merida virus	0	2.7409e-07	0	0	5.87916e-06	0.000221375	1.30303e-05	6.90694e-07	0	3.28396e-06
Arthrobacter virus Amigo	0	1.37045e-07	0	6.14137e-05	1.46979e-06	1.67708e-06	1.30303e-05	0	0	4.92595e-06
Lake Baikal phage Baikal-20-5m-C28	0	1.37045e-07	3.65729e-07	0	4.40937e-06	0	0.000182425	0	0	9.85189e-06
West Nile virus	0	2.7409e-07	0	0	2.93958e-06	0	1.30303e-05	0	0.00021575	1.64198e-06
Verticillium longisporum ambiguivirus 1	0	1.91863e-06	0	6.14137e-05	2.93958e-06	0	0	0	0.000107875	1.64198e-06
Hubei picorna-like virus 26	0	0	0	0	0	0	0	0	0.00021575	0
Plautia stali intestine virus	0	1.26081e-05	0	0	1.46979e-06	0	0	0	0	0
Synechococcus phage S-CBS2	0	2.7409e-07	0	0	0	0	0.000156364	6.90694e-07	0	0
Lassa mammarenavirus	0	0	0	0	0	0	0	0	0	1.64198e-06
Escherichia phage ST32	0	0	0	0	0	0	0.000221516	0	0	0
Synechococcus phage S-CAM22	0	0	0	0	0	0	0.000221516	0	0	0
Enterobacter phage phiEap-1	0	1.37045e-07	3.65729e-07	0	8.81874e-06	0	7.8182e-05	2.30231e-07	0	0
Pteropus associated gemykibivirus 1	3.91917e-07	5.31734e-05	7.31458e-07	0	7.34895e-06	0	1.30303e-05	4.60463e-07	0.000107875	3.28396e-06
Propionibacterium virus PHL071N05	0	0	0	0	1.46979e-06	0	0	0	0.00021575	0
uncultured Microviridae	0	1.37045e-07	0	0	1.46979e-06	0	0	0	0.00021575	0
Hubei picorna-like virus 18	0	0	0	0	0	0	0	0	0.00021575	0
Pasteurella phage PMP-GADVASU-IND	0	0	0	0	4.40937e-06	0	0.000208485	0	0	0
Miniopterus associated gemycircularvirus 1	0	1.2334e-06	0	0	1.46979e-06	0	0.000208485	0	0	1.64198e-06
Changjiang partiti-like virus 1	5.09492e-05	2.32976e-06	1.97494e-05	3.07069e-05	7.34895e-06	3.35417e-05	0	0	0	0
Synechococcus phage S-CBS1	0	0	0	0	2.05771e-05	0	0.000169394	0	0	0
Burkholderia phage BcepGomr	0	0	0	0	2.93958e-06	0	0	0	0.000107875	0
Salmonella phage FSL SP-029	0	1.37045e-07	0	0	0	0	0	0	0	0
Salmonella phage BP12A	0	0	7.31458e-07	0	0	1.67708e-06	0.000117273	2.30231e-07	0	0
Vibrio virus nt1	0	0	0	0	4.40937e-06	0	0	2.30231e-07	0	0
Vibrio phage 2.275.O._10N.286.54.E11	0	0	0	0.000122827	2.93958e-05	1.67708e-06	1.30303e-05	0	0	0
Propionibacterium phage pa29399-1-D_2	0	0	0	0	0	0	0.000195455	2.30231e-07	0	0
Propionibacterium virus Lauchelly	3.91917e-07	0	0	0	2.93958e-06	0	0	0	0.000107875	0
Murine leukemia-related retroviruses	0	0	3.65729e-07	0	0	0	0.000156364	6.90694e-07	0	0
Alteromonas phage PB15	0	0	0	0	1.61677e-05	0	7.8182e-05	0	0	1.64198e-06
Cherry virus A	3.91917e-07	7.3182e-05	3.65729e-07	9.21206e-05	2.93958e-06	3.35417e-06	1.30303e-05	1.15116e-06	0	0
Ralstonia phage RPSC1	0	0	1.93836e-05	0	4.40937e-05	3.35417e-06	3.9091e-05	2.30231e-07	0	3.28396e-06
Torque teno sus virus 1b	0	0	0	0	0	5.03125e-06	0.000169394	0	0	0
Shuangao insect virus 11	0	6.98929e-06	0	0	1.46979e-06	1.67708e-06	0	0	0	0
Streptomyces phage Gilson	0	0	0	0	4.40937e-06	0	0	0	0	0
Salicola phage CGphi29	0	0	0	0	4.40937e-06	0	0	0	0	0
Hubei sobemo-like virus 8	2.3515e-06	7.26338e-06	7.31458e-07	0	2.93958e-06	1.67708e-06	1.30303e-05	7.59764e-06	0	0
Salmonella phage Vi II-E1	0	0	0	0	0	0	0.000182425	0	0	0
CRESS virus sp.	1.80282e-05	3.9743e-06	1.71893e-05	3.07069e-05	7.34895e-06	2.51563e-05	2.60607e-05	0	0	3.28396e-06
Megaviridae environmental sample	0	5.4818e-07	0	0	0	0	0.000182425	0	0	0
Sinorhizobium phage phiM6	0	0	0	0	1.46979e-06	0	0	4.60463e-07	0	0
Niemeyer virus	0	0	0	0	0	0	0.000182425	0	0	0
Exiguobacterium phage vB_EalM-132	0	0	0	0	1.46979e-06	0	0	0	0	0
Citrus tristeza virus	3.91917e-07	0	0	0	0	0	0	0	0	0
Zhejiang mosquito virus 3	0	1.37045e-07	0	0	0	0	0	0	0	0
Murray Valley encephalitis virus	0	0	3.65729e-07	0	0	0	0	0	0	0
Narnaviridae environmental sample	0	1.37045e-07	0	0	0	0	0	0	0	0
Enterobacteria phage Hgal1	0	0	0	0	0	0	0	0	0	0
Picobirnavirus PREDICT_PbV-104	0	0	0	0	0	0	0	0	0	0
Rhodococcus virus Poco6	0	0	0	0	5.87916e-05	1.50938e-05	6.51517e-05	0	0	0
Shuangao insect virus 9	0	1.37045e-07	0	0	1.46979e-06	0	5.21213e-05	1.84185e-06	0.000107875	0
Baku virus	0	0	0	0	1.61677e-05	1.00625e-05	0	0	0	0
Lentibacter virus vB_LenP_VB2	0	0	0	0	1.46979e-06	0	0.000104243	0	0	0
Wuhan fly virus 6	0	6.85225e-07	0	0	0	0	0.000169394	6.90694e-07	0	0
Prochlorococcus phage P-RSP2	0	0	0	0	0	0	0.000169394	0	0	0
Invertebrate iridescent virus 31	0	0	0	6.14137e-05	0	0	0	0	0.000107875	0
Escherichia phage Ebrios	0	0	0	0	1.46979e-06	0	0.000104243	4.60463e-07	0	0
Hubei tombus-like virus 20	0	0	7.31458e-07	3.07069e-05	4.40937e-06	0	1.30303e-05	2.53255e-06	0	6.07533e-05
Wuhan insect virus 23	0	0	0	0	0	3.35417e-06	0.000117273	2.53255e-06	0	3.44816e-05
Usutu virus	0	0	3.65729e-07	0	1.46979e-06	0	1.30303e-05	0	0	0
uncultured cyanophage	0	2.7409e-07	3.65729e-07	0	1.32281e-05	1.67708e-06	6.51517e-05	0	0	1.64198e-06
Human endogenous retrovirus K	2.31231e-05	5.4818e-07	0	0	0	0	3.9091e-05	1.15116e-06	0	1.64198e-06
Rose yellow leaf virus	0	0	0	0.000153534	5.87916e-06	0	0	0	0	0
Escherichia phage Halfdan	0	1.2334e-06	0	0	1.46979e-06	0	0	0	0	0
Caulobacter phage Cr30	0	1.37045e-07	0	0	1.46979e-06	0	0	0	0	0
Vibrio phage BOuc_viralISHI	0	0	0	0	0	0	0.000156364	0	0	0
Pineapple mealybug wilt-associated virus 2	0	0	0	0	0	0	0	0	0	0
Hubei partiti-like virus 37	0	0	0	0	0	0	0.000143334	0	0	9.85189e-06
Beauveria bassiana victorivirus NZL/1980	0	0	0	0	0	0	0	0	0	0
Hubei narna-like virus 1	0	0	0	0.000153534	0	0	0	0	0	0
Culex rhabdo-like virus	3.91917e-07	1.11006e-05	4.46189e-05	0	1.46979e-06	0	1.30303e-05	2.30231e-07	0	3.28396e-06
Serratia phage BF	0	0	0	0	3.23354e-05	0	0.000117273	0	0	0
Penicillium chrysogenum virus	0	0	0	0	0	0	0	0	0	0
Banana streak GF virus	0	0	0	0	0	0	0	0	0	0
Mycobacterium phage Kersh	0	0	0	9.21206e-05	7.34895e-06	0	0	4.60463e-07	0	1.64198e-05
Beihai partiti-like virus 2	0	0	0	0	0	0	0.000143334	0	0	1.64198e-06
Human immunodeficiency virus 2	0	4.11135e-07	3.65729e-07	0	8.81874e-06	0	1.30303e-05	1.84185e-06	0.000107875	0
Acidovorax phage ACPWH	0	0	0	0	1.61677e-05	0	1.30303e-05	0	0.000107875	1.64198e-06
Synechococcus phage S-H1	3.91917e-07	0	3.29156e-06	0	2.20469e-05	0	0	0	0	0
Ralstonia phage RSB3	0	0	0	0	0	0	7.8182e-05	0	0	0
Hubei tombus-like virus 28	0	4.11135e-07	0	0	0	0	2.60607e-05	1.61162e-06	0.000107875	3.28396e-06
Beihai shrimp virus 2	0	0	0	0	1.46979e-06	0	0	4.60463e-07	0	1.64198e-06
Synechococcus phage S-CAM8	0	1.37045e-07	0	0	2.35167e-05	0	1.30303e-05	2.30231e-07	0	0
Mamastrovirus 13	0	0	0	3.07069e-05	0	0	0	0	0.000107875	0
Propionibacterium virus P100A	0	0	0	0	0	0	0	0	0	0
Sanxia tombus-like virus 5	0	0	0	0	0	0	0	0	0	0
Betapapillomavirus 2	0	0	0	0	0	0	0	2.30231e-07	0.000107875	0
Hubei toti-like virus 10	3.91917e-07	4.01542e-05	3.65729e-07	0	1.76375e-05	0	0	5.75579e-06	0	6.56793e-06
Citrus yellow vein clearing virus	0	0	0	6.14137e-05	2.93958e-06	0	0	0	0	0
Escherichia phage 64795_ec1	0	5.4818e-07	0	0	4.40937e-06	0	2.60607e-05	6.90694e-07	0	1.64198e-06
Klebsiella phage vB_KpnS_KpV522	0	0	3.65729e-07	3.07069e-05	7.20197e-05	0	2.60607e-05	0	0	1.64198e-06
Indivirus ILV1	0	1.37045e-07	0	0	4.40937e-06	0	1.30303e-05	0	0	0
Macacine alphaherpesvirus 1	3.91917e-07	6.85225e-07	2.12123e-05	6.14137e-05	1.46979e-06	0	1.30303e-05	1.15116e-06	0	1.64198e-06
Escherichia virus JL1	0	0	0	0	0	3.35417e-06	0	0	0	0
Klebsiella phage YX3973	0	0	0	0	9.1127e-05	0	3.9091e-05	0	0	0
Circovirus-like genome RW-C	5.09492e-06	1.37045e-07	1.53606e-05	0	0	0	0	0	0.000107875	0
Bocaparvovirus sp.	0	0	3.65729e-07	0	1.46979e-06	0	0	2.30231e-07	0	1.64198e-06
Dipteran brevidensovirus 1	0	0	0	0	0	0	2.60607e-05	8.97902e-05	0	4.92595e-06
Paramecium bursaria Chlorella virus AR158	0	0	0	0	7.93687e-05	0	0	0	0	1.64198e-06
Hubei sobemo-like virus 7	0	8.2227e-07	0	0	0	0	0	0	0	0
Synechococcus phage S-T4	0	1.37045e-07	0	0	2.93958e-06	0	1.30303e-05	2.30231e-07	0	0
Salinivibrio phage CW02	0	0	0	0.000122827	1.46979e-06	0	0	0	0	0
Hubei partiti-like virus 44	0	0	0	0	0	0	0.000117273	2.30231e-07	0	3.28396e-06
Rhizobium phage RHE	0	0	0	0	0	0	0	0	0	0
Propionibacterium phage PHL073M02	0	0	0	0	0	0	0	0	0	0
Orthohepevirus A	0	0	0	3.07069e-05	8.81874e-06	0	0	1.38139e-06	0	4.92595e-06
Verticillium dahliae chrysovirus 1	0	0	0	0	0	0	0	0	0	0
Hepatitis B virus	3.91917e-07	0	0	3.07069e-05	2.93958e-06	1.67708e-06	2.60607e-05	0	0	0
Delisea pulchra totivirus IndA	0	4.11135e-07	0	0	0	0	1.30303e-05	0	0.000107875	0
Propionibacterium virus PAS50	0	0	0	0	0	0	1.30303e-05	0	0.000107875	0
Propionibacterium virus PHL070N00	0	0	0	0	8.81874e-06	1.67708e-06	0	0	0.000107875	1.64198e-06
Arthrobacter virus Gordon	0	0	0	0	1.46979e-06	0	0.000117273	0	0	0
Feline leukemia virus	0	1.37045e-07	0	0	0	0	0	0	0	4.92595e-06
Newington virus	0	0	0	0	0	0	0	0	0.000107875	6.56793e-06
Gordonia phage Duffington	0	0	0	0	0	0	0.000117273	0	0	0
Phaeocystis pouchetii virus	0	0	0	0	0	0	0.000117273	0	0	0
Circoviridae sp.	9.01408e-06	1.09636e-06	1.24348e-05	3.07069e-05	1.46979e-06	1.17396e-05	0	0	0	0
Gokushovirinae environmental samples	0	8.2227e-07	0	3.07069e-05	1.32281e-05	5.03125e-06	0	2.30231e-07	0	0
Hubei partiti-like virus 36	0	2.32976e-06	3.65729e-07	0	5.14427e-05	2.34792e-05	1.30303e-05	0	0	1.97038e-05
Vibrio phage 1.047.O._10N.286.55.F2	3.91917e-07	0	0	0	0	0	0	2.30231e-07	0.000107875	0
Gokushovirinae Bog8989_22	0	0	0	0	0	6.70834e-06	0.000104243	0	0	0
Stenotrophomonas phage vB_SmaS_DLP_5	0	0	0	3.07069e-05	3.38052e-05	0	0	0	0	1.64198e-06
Pseudomonas phage phiAH14a	0	0	3.65729e-07	0	7.49593e-05	0	0	0	0	0
Rhizoctonia solani endornavirus 1	0	0	0	0	1.46979e-06	0	0	4.60463e-07	0.000107875	0
Gordonia phage Rickmore	0	1.37045e-07	0	0	4.40937e-05	0	6.51517e-05	0	0	0
Equid alphaherpesvirus 3	0	1.37045e-07	0	0	1.46979e-06	0	0	0	0.000107875	0
Ralstonia phage GP4	7.83833e-07	0	0	0	2.05771e-05	0	0	0	0	0
Burkholderia virus DC1	0	4.11135e-07	0	0	0	0	0	0	0	0
Pseudoalteromonas phage H103	0	0	0	0	1.46979e-06	0	0	0	0	0
Botryosphaeria dothidea partitivirus 1	0	0	0	0	0	0	0	2.30231e-07	0	0
Soybean leaf-associated ssRuc_viral virus 3	0	0	0	0	0	0	0	0	0	0
Sphaeropsis sapinea Ruc_viral virus 2	0	0	0	0	0	0	0	0	0	0
Antheraea pernyi iflavirus	0	1.37045e-07	3.65729e-07	0	0	0	0	0	0.000107875	0
Human immunodeficiency virus	0	0	0	0	0	0	0	4.60463e-07	0.000107875	0
Heliconius erato iflavirus	0	2.7409e-07	0	0	0	0	0	0	0.000107875	0
East African cassava mosaic virus	0	0	0	0	0	0	0	2.30231e-07	0.000107875	0
Robinvale plant virus 1	0	1.37045e-07	0	0	0	0	0	0	0.000107875	0
Klebsiella phage Pylas	0	0	0	0	0	0	0	0	0.000107875	0
Arthrobacter phage Ryan	0	0	0	0	0	0	0	0	0.000107875	0
Vibrio phage pYD38-B	0	0	0	0	0	0	0	0	0.000107875	0
Ranid herpesvirus 1	0	0	0	0	0	0	0	0	0.000107875	0
Nudaurelia capensis beta virus	0	0	0	0	0	0	0	0	0.000107875	0
Red clover associated virus	0	0	0	0	0	0	0	0	0.000107875	0
Microviridae Bog5275_51	0	0	0	0	0	0	0	0	0.000107875	0
Thetaarterivirus mikelba 1	0	0	0	0	0	0	0	0	0.000107875	0
Synechococcus phage S-LBS1	0	0	0	0	2.64562e-05	0	6.51517e-05	0	0	1.64198e-06
Salicola phage SCTP-2	0	1.37045e-07	0	0	2.35167e-05	0	0	0	0	0
Camelpox virus	0	0	0	9.21206e-05	0	0	1.30303e-05	0	0	0
Hubei sobemo-like virus 21	0	2.7409e-07	0	0	0	0	0.000104243	0	0	0
Xanthomonas phage RiverRider	0	0	0	0	0	0	0.000104243	0	0	0
Pseudomonas virus Pf1 ERZ-2017	0	0	0	0	0	0	3.9091e-05	0	0	1.64198e-06
Moloney murine sarcoma virus	0	1.37045e-07	3.65729e-07	0	2.93958e-06	1.67708e-06	7.8182e-05	6.90694e-07	0	0
African swine fever virus	3.91917e-07	0	0	3.07069e-05	1.46979e-06	0	0	2.30231e-07	0	1.64198e-06
Hokovirus HKV1	3.91917e-07	0	0	3.07069e-05	5.43823e-05	0	1.30303e-05	4.60463e-07	0	0
Hubei partiti-like virus 19	0	0	0	0	0	0	1.30303e-05	0	0	6.56793e-06
Sodalis virus SO1	0	0	0	3.07069e-05	0	3.35417e-06	0	0	0	0
Escherichia virus YD2008s	0	2.7409e-07	0	0	0	0	0	0	0	0
Escherichia phage vB_Ecos_CEB_EC3a	0	0	0	0	0	0	0	0	0	0
Bougainvillea chlorotic vein banding virus	0	0	0	0	0	0	0	0	0	0
Parry Creek hapavirus	0	1.37045e-07	0	0	4.40937e-06	7.37917e-05	0	0	0	0
Thermus phage TSP4	0	5.4818e-07	0	0	0	0	0	2.30231e-07	0	0
Synechococcus phage S-RIP1	0	0	0	0	2.93958e-06	0	0	0	0	1.64198e-06
Escherichia phage DTL	0	0	0	0	0	0	0	0	0	0
Hubei toti-like virus 9	0	2.00086e-05	1.46292e-06	3.07069e-05	1.02885e-05	0	0	1.38139e-06	0	1.64198e-06
Propionibacterium phage PacnesP1	0	0	0	0	0	0	0	2.30231e-07	0	0
Escherichia phage YDC107_1	0	0	0	0	0	0	0	0	0	0
Arctopus echinatus-associated virus	0	0	0	0	0	0	0	0	0	0
Apis mellifera filamentous virus	0	0	0	0	2.93958e-05	0	0	0	0	1.64198e-06
Escherichia virus BZ13	0	0	0	6.14137e-05	0	0	0	0	0	0
Porcine mastadenovirus C	0	0	0	9.21206e-05	0	0	0	0	0	0
Ostreococcus lucimarinus virus 7	0	0	0	9.21206e-05	0	0	0	0	0	0
Pyramimonas orientalis virus	0	0	0	0	0	0	9.12123e-05	0	0	0
Klebsiella phage TAH8	0	0	7.31458e-07	0	0	0	9.12123e-05	0	0	0
Erwinia phage phiEaP-8	1.56767e-06	0	0	0	0	0	0	0	0	0
Mycobacterium phage Odin	0	0	0	0	0	0	9.12123e-05	0	0	0
Organic Lake phycodnavirus 1	0	0	3.65729e-07	0	1.46979e-06	0	0	0	0	0
Penicillium spinulosum metavirus 1	0	1.11006e-05	0	0	1.46979e-06	0	0	2.30231e-07	0	1.64198e-06
Primate T-lymphotropic virus 1	3.91917e-07	1.37045e-07	2.26752e-05	0	1.46979e-06	0	0	4.60463e-07	0	1.64198e-06
Glypta fumiferanae ichnovirus	7.83833e-07	0	7.31458e-07	0	0	0	2.60607e-05	2.99301e-06	0	0
Enterococcus phage EFP01	0	0	0	0	2.93958e-06	0	7.8182e-05	1.38139e-06	0	0
Pteropus associated gemygorvirus 1	2.39069e-05	2.60385e-06	0	6.14137e-05	0	0	0	0	0	0
Yersinia phage fEV-1	0	2.32976e-06	3.65729e-07	0	4.40937e-06	0	0	2.30231e-07	0	0
Orthopteran ambidensovirus 1	0	1.37045e-07	0	0	0	0	0	0	0	9.85189e-06
Sugarcane mosaic virus	0	2.7409e-07	0	0	4.40937e-06	1.67708e-06	7.8182e-05	2.30231e-07	0	0
Catovirus CTV1	0	0	0	6.14137e-05	2.20469e-05	0	0	0	0	0
Pectobacterium phage DU_PP_II	0	0	0	0	2.93958e-06	0	1.30303e-05	0	0	1.64198e-06
Pandoravirus dulcis	3.91917e-07	1.37045e-07	7.31458e-07	3.07069e-05	2.20469e-05	0	1.30303e-05	0	0	1.64198e-06
Achromobacter phage JWF	0	0	0	6.14137e-05	2.05771e-05	0	0	0	0	0
Hubei picorna-like virus 24	3.91917e-07	1.37045e-05	7.31458e-07	0	2.93958e-06	1.67708e-06	0	2.30231e-07	0	0
Colletotrichum zoysiae totivirus 1	0	0	0	0	0	0	0	0	0	0
Hubei toti-like virus 13	0	0	0	0	0	0	0	2.30231e-07	0	0
Botryosphaeria dothidea virus 1	0	1.37045e-07	0	0	0	0	0	0	0	0
Alternaria alternata chrysovirus 1	0	0	0	0	0	0	0	0	0	0
Lake Sarah-associated circular molecule 3	0	0	0	0	0	0	0	0	0	0
Soybean leaf-associated ssRuc_viral virus 2	0	0	0	0	0	0	0	0	0	0
Magnaporthe oryzae ourmia-like virus	0	0	0	0	0	0	0	0	0	0
Phomopsis vexans Ruc_viral virus	0	0	0	0	0	0	0	0	0	0
Ustilaginoidea virens Ruc_viral virus 3	0	0	0	0	0	0	0	0	0	0
Grasshopper associated circular virus 1	1.21494e-05	4.11135e-07	0	0	0	0	0	0	0	0
Sanxia permutotetra-like virus 1	2.03797e-05	7.53747e-06	3.65729e-07	0	0	3.35417e-06	1.30303e-05	1.61162e-06	0	1.64198e-06
Chicken calicivirus	0	0	0	0	0	0	6.51517e-05	0	0	0
Goose calicivirus	0	0	6.94885e-06	0	0	0	2.60607e-05	0	0	0
Hubei diptera virus 16	0	0	0	0	0	0	7.8182e-05	0	0	0
Cauliflower mosaic virus	0	0	0	0	1.46979e-06	0	0	0	0	1.14939e-05
Densovirus SC525	3.91917e-07	1.37045e-07	0	0	0	0	0	0	0	3.28396e-06
Nodamura virus	0	6.16702e-06	0	3.07069e-05	0	0	0	2.30231e-07	0	0
Hubei noda-like virus 26	3.91917e-07	2.59015e-05	7.31458e-07	3.07069e-05	4.40937e-06	0	0	0	0	1.64198e-06
Aphis glycines virus 1	0	0	0	0	0	0	0	0	0	0
Halyomorpha halys virus	0	1.80899e-05	0	3.07069e-05	0	0	0	0	0	1.64198e-06
Escherichia virus EK99P1	0	0	0	0	0	0	0	4.60463e-07	0	0
Podovirus SOG	0	0	0	3.07069e-05	1.46979e-06	0	0	0	0	0
Sinorhizobium phage phiM5	0	0	0	0	2.93958e-06	0	0	0	0	2.46297e-05
Porcine circovirus 2	0	0	0	0	1.46979e-06	0	3.9091e-05	6.90694e-07	0	0
Bundaberg bee virus 5	0	1.60343e-05	0	0	2.93958e-06	0	0	6.90694e-07	0	0
Hubei partiti-like virus 45	0	0	0	0	5.87916e-06	3.35417e-06	3.9091e-05	6.90694e-07	0	1.80618e-05
Erwinia phage vB_EamP-L1	0	0	0	0	2.35167e-05	0	1.30303e-05	4.60463e-07	0	1.64198e-06
Thermus virus P23-77	0	0	7.31458e-07	0	1.32281e-05	0	0	6.90694e-07	0	1.14939e-05
Pectobacterium phage PP74	0	1.78158e-06	0	0	2.05771e-05	0	1.30303e-05	2.53255e-06	0	0
Stenotrophomonas phage vB_SmaS-DLP_6	0	4.11135e-07	0	0	2.93958e-06	0	6.51517e-05	0	0	0
Hubei partiti-like virus 5	0	1.37045e-07	0	0	0	0	0	0	0	1.64198e-06
Chrysochromulina ericina virus	0	4.11135e-07	3.65729e-07	0	2.93958e-05	0	3.9091e-05	0	0	0
Pandoravirus quercus	3.91917e-07	1.37045e-07	3.65729e-07	3.07069e-05	1.17583e-05	0	2.60607e-05	0	0	0
Synechococcus phage S-CAM3	0	0	0	0	0	0	2.60607e-05	0	0	0
Satyrvirus sp.	0	6.85225e-07	0	3.07069e-05	2.05771e-05	3.35417e-06	1.30303e-05	0	0	0
Bovine adenovirus E	0	3.37131e-05	3.65729e-07	3.07069e-05	4.40937e-06	0	0	1.15116e-06	0	0
Idiomarinaceae phage Phi1M2-2	0	0	0	0	2.93958e-06	0	1.30303e-05	0	0	0
uncultured Mediterranean phage uvDeep-CGR2-AD7-C12	0	0	0	6.14137e-05	1.46979e-06	0	0	0	0	0
Serratia phage Scapp	0	0	0	0	1.46979e-06	0	0	0	0	4.92595e-06
Cronobacter phage vB_CsaP_Ss1	0	0	0	0	1.46979e-06	0	0	0	0	0
Vibrio phage ValSw3-3	0	0	0	0	0	0	0	0	0	0
Pseudomonas phage 201phi2-1	0	0	7.31458e-07	6.14137e-05	5.87916e-06	0	0	0	0	0
EBPR siphovirus 2	0	1.37045e-07	0	0	5.43823e-05	0	1.30303e-05	0	0	0
Ungulate tetraparvovirus 3	0	0	0	0	0	5.53438e-05	1.30303e-05	2.30231e-07	0	0
Streptomyces phage Satis	0	0	0	0	1.61677e-05	0	5.21213e-05	0	0	0
Ralstonia phage RS-PII-1	0	0	0	0	4.85031e-05	0	0	2.30231e-07	0	4.92595e-06
Colletotrichum fructicola chrysovirus 1	0	1.37045e-07	0	0	0	0	0	0	0	0
Colletotrichum acutatum Ruc_viral virus 1	0	0	0	0	0	0	0	0	0	0
Hubei noda-like virus 25	0	0	0	0	0	0	0	0	0	0
Heliothis zea nudivirus	0	0	0	0	0	0	0	0	0	0
Pepper mild mottle virus	0	0	0	0	0	0	0	0	0	0
Escherichia virus T4	0	0	0	0	0	0	0	0	0	1.64198e-06
Paracoccus phage vB_PsuS_Psul1	0	0	0	0	1.46979e-06	0	0	0	0	0
Apis mellifera associated microvirus 12	0	0	0	0	0	6.70834e-05	0	0	0	0
Hubei partiti-like virus 38	0	0	0	0	0	8.38542e-06	5.21213e-05	9.20926e-07	0	1.64198e-06
Metopaulias depressus WSSV-like virus	0	0	0	0	0	0	6.51517e-05	1.15116e-06	0	0
Pseudomonas virus PaMx74	0	0	0	0	0	0	0	4.60463e-07	0	0
Salmonid herpesvirus 2	0	0	0	3.07069e-05	7.34895e-06	0	0	2.30231e-07	0	0
Pectobacterium phage vB_PatP_CB4	0	1.37045e-07	6.58312e-06	0	0	0	0	0	0	0
Mycobacterium phage Changeling	0	0	0	0	0	0	6.51517e-05	0	0	0
Pariacoto virus	0	0	0	0	0	0	6.51517e-05	0	0	0
Freshwater phage uvFW-CGR-AMD-COM-C403	0	1.37045e-07	0	0	2.93958e-06	0	5.21213e-05	0	0	0
Partitivirus-like 4	7.44642e-06	1.78158e-06	9.87468e-06	0	0	1.00625e-05	0	0	0	3.28396e-06
Tetraselmis viridis virus S20	0	1.5349e-05	3.65729e-07	0	4.40937e-06	1.67708e-06	1.30303e-05	2.30231e-07	0	1.64198e-06
Brevibacterium phage LuckyBarnes	0	0	0	0	0	0	0	0	0	0
Ungulate protoparvovirus 1	0	0	0	0	0	2.18021e-05	1.30303e-05	0	0	1.47778e-05
Porcine bocavirus	9.79792e-06	0	0	0	0	5.19896e-05	0	1.38139e-06	0	0
Bastrovirus-like_virus/VietNam/Bat/17819_21	0	1.09636e-06	0	6.14137e-05	0	0	0	0	0	0
Scheffersomyces segobiensis virus L	0	9.59315e-07	0	6.14137e-05	0	0	0	2.30231e-07	0	0
Hubei picorna-like virus 57	0	1.37045e-07	3.07212e-05	0	0	0	0	0	0	0
Klebsiella phage vB_Kp3	0	0	0	0	0	0	0	0	0	0
Vibrio phage 1.183.O._10N.286.48.B7	0	0	0	0	0	0	0	0	0	0
Gopherus associated genomovirus 1	0	1.37045e-05	0	0	1.46979e-06	0	0	0	0	1.64198e-06
Eel River basin pequenovirus	0	0	5.12021e-06	0	1.46979e-06	0	1.30303e-05	2.30231e-07	0	0
Saimiriine betaherpesvirus 4	3.91917e-07	4.11135e-07	0	0	2.7926e-05	0	0	0	0	0
Human papillomavirus	0	0	3.65729e-07	0	1.46979e-06	0	1.30303e-05	2.30231e-07	0	0
Aspergillus fumigatus mitovirus 1	0	0	0	0	0	0	0	0	0	0
Dragonfly cyclicusvirus	7.0545e-06	0	1.24348e-05	0	1.46979e-06	0	0	0	0	0
Salmonella phage SeSz-2	0	0	0	0	0	0	2.60607e-05	0	0	0
Synechococcus phage S-CBP2	0	0	0	0	0	0	1.30303e-05	0	0	0
Grapevine rupestris vein feathering virus	0	2.4531e-05	0	3.07069e-05	0	0	0	2.30231e-07	0	0
Hubei partiti-like virus 57	0	9.59315e-07	1.46292e-06	0	0	5.36667e-05	0	0	0	0
Cyanophage P-RSM1	0	0	0	3.07069e-05	2.49864e-05	0	0	0	0	0
Salmonella phage Astrid	0	0	0	0	0	0	0	0	0	0
Hemipteran ambidensovirus 2	1.95958e-05	2.7409e-07	3.32813e-05	0	1.46979e-06	0	0	4.60463e-07	0	0
Hubei partiti-like virus 4	0	0	0	0	0	0	1.30303e-05	0	0	0
Prochlorococcus phage Syn1	0	0	0	0	1.46979e-06	0	5.21213e-05	4.60463e-07	0	0
Pseudomonas phage ventosus	0	0	0	0	0	0	0	0	0	0
Vibrio phage Vc1	0	0	0	0	0	0	0	0	0	0
Hubei odonate virus 5	0	6.85225e-07	0	0	0	0	1.30303e-05	0	0	0
Culex densovirus	0	0	0	0	1.46979e-06	0	5.21213e-05	4.60463e-07	0	0
Bacteriophage APSE	0	0	0	0	0	0	0	0	0	0
Streptomyces phage Annadreamy	0	0	0	0	0	0	0	0	0	0
Escherichia phage vB_EcoS-Ro145clw	0	0	0	0	0	0	0	0	0	0
uncultured Mediterranean phage MEDS2 group	0	0	0	0	0	0	0	0	0	0
Cronobacter virus GAP31	0	0	4.68133e-05	0	7.34895e-06	0	0	0	0	0
Podosphaera prunicola partitivirus 4	0	6.30407e-06	1.09719e-06	0	0	0	0	9.20926e-07	0	0
Siphovirus contig89	0	0	0	0	1.46979e-06	0	5.21213e-05	0	0	0
Salmonella phage Munch	0	0	0	0	4.99729e-05	0	0	0	0	3.28396e-06
Arthrobacter phage Correa	0	0	0	0	0	0	5.21213e-05	9.20926e-07	0	0
Vespa velutina partiti-like virus 1	0	0	0	0	0	0	2.60607e-05	2.30231e-07	0	1.31359e-05
Picobirnavirus HK-2014	0	0	7.68031e-06	3.07069e-05	0	0	0	0	0	0
Pelagibacter phage HTVC008M	0	0	0	0	1.02885e-05	0	1.30303e-05	0	0	0
Acinetobacter phage ZZ1	0	0	0	0	0	0	5.21213e-05	0	0	0
Mycobacterium phage Bobi	0	0	0	0	0	0	5.21213e-05	0	0	0
Salmonella phage Skate	0	0	0	0	0	0	5.21213e-05	0	0	0
Pteropus associated gemycircularvirus 8	0	0	0	0	0	0	5.21213e-05	0	0	0
Pseudoalteromonas phage H105/1	0	1.37045e-07	0	0	1.91073e-05	0	0	0	0	0
Gemycircularvirus sp.	4.93815e-05	2.7409e-07	0	0	0	0	0	2.30231e-07	0	0
Synechococcus virus S-ESS1	0	0	1.09719e-06	0	1.46979e-06	0	1.30303e-05	0	0	0
Wuhan cricket virus 2	0	0	0	0	0	1.67708e-06	0	0	0	1.64198e-06
Merida-like virus Turkey	0	0	0	0	0	4.86354e-05	0	0	0	0
Caulobacter phage CcrPW	0	0	0	3.07069e-05	1.61677e-05	0	0	0	0	0
Shuangao Insect Virus 3	0	1.09636e-06	2.19437e-06	0	0	0	1.30303e-05	4.14417e-06	0	0
Avian leukosis virus	0	1.37045e-07	0	0	1.46979e-06	1.67708e-06	0	8.51856e-06	0	3.28396e-06
Hubei noda-like virus 23	0	2.87794e-06	0	0	2.93958e-06	0	0	0	0	0
African cassava mosaic virus	0	0	0	0	0	0	1.30303e-05	1.38139e-06	0	0
Cyanophage P-RSM6	0	0	0	0	1.46979e-06	5.03125e-06	3.9091e-05	0	0	0
Pithovirus sibericum	0	1.37045e-07	7.31458e-07	0	0	0	0	0	0	0
Synechococcus phage S-WAM2	0	1.37045e-07	0	0	0	0	1.30303e-05	0	0	0
Escherichia virus alpha3	0	0	0	0	0	4.52813e-05	0	0	0	0
Phage sp.	0	0	0	0	0	0	0	0	0	0
Triatoma virus	0	0	0	0	0	0	0	0	0	0
Fowlpox virus	3.91917e-07	0	0	0	0	0	0	0	0	0
Ralstonia phage RSK1	0	0	0	0	1.46979e-06	0	3.9091e-05	0	0	0
Pseudomonas phage nickie	0	0	0	0	0	0	0	0	0	0
Synechococcus phage S-SM2	0	0	3.65729e-07	0	8.81874e-06	0	0	4.60463e-07	0	0
Escherichia virus T7	0	0	0	0	0	0	1.30303e-05	0	0	0
Geobacillus virus Tp84	0	0	0	3.07069e-05	0	0	0	0	0	0
Enterobacteria phage vB_EcoS_IME542	0	0	0	3.07069e-05	0	0	0	0	0	0
Dishui lake phycodnavirus 1	0	0	0	0	2.93958e-06	0	0	0	0	0
Influenza A virus	3.91917e-07	4.11135e-07	3.65729e-07	0	1.32281e-05	0	2.60607e-05	2.30231e-07	0	1.64198e-06
Solenopsis invicta virus 2	3.91917e-07	7.26338e-06	0	0	1.46979e-06	0	0	6.90694e-07	0	1.64198e-06
Ungulate tetraparvovirus 2	1.17575e-06	1.37045e-07	0	0	0	4.19271e-05	0	0	0	0
Heterosigma akashiwo virus 01	0	0	0	0	0	0	0	0	0	1.14939e-05
Erythrobacter phage vB_EliS_R6L	0	0	0	0	1.46979e-06	0	0	0	0	0
Acinetobacter phage IME_AB3	0	0	0	0	2.93958e-05	0	0	0	0	0
Psychrobacter phage pOW20-A	0	0	3.65729e-07	0	2.93958e-06	0	3.9091e-05	0	0	0
Escherichia phage fp01	7.83833e-07	4.11135e-07	0	0	1.46979e-06	0	3.9091e-05	0	0	0
Hubei tombus-like virus 21	0	0	0	0	1.46979e-06	0	0	8.28833e-06	0	0
Linvill Road virus	0	0	1.09719e-06	0	0	0	1.30303e-05	0	0	0
Serratia phage SM9-3Y	0	1.37045e-07	0	0	0	0	3.9091e-05	0	0	0
uncultured phage	0	0	0	0	0	0	1.30303e-05	0	0	0
Pseudomonas phage AF	0	0	0	0	3.96843e-05	0	0	0	0	0
Phomopsis longicolla circular virus 1	0	0	0	0	0	0	0	0	0	0
Ustilaginoidea virens partitivirus 3	0	0	0	0	0	0	0	0	0	0
Valsa cypri partitivirus	0	0	0	0	0	0	0	0	0	0
Freshwater phage uvFW-CGR-AMD-COM-C429	0	2.7409e-07	3.65729e-07	0	1.02885e-05	0	1.30303e-05	2.30231e-07	0	0
Acinetobacter phage Ac42	0	0	0	0	1.46979e-06	0	3.9091e-05	0	0	0
uncultured phage MedDCM-OCT-S04-C24	0	0	0	0	0	0	3.9091e-05	2.30231e-07	0	0
Beihai barnacle virus 12	0	0	0	0	0	0	3.9091e-05	2.30231e-07	0	0
Linepithema humile polycipivirus 2	0	7.67452e-06	0	0	0	0	0	4.60463e-07	0	0
Hubei partiti-like virus 46	0	0	0	0	0	0	3.9091e-05	2.30231e-07	0	0
Pandoravirus macleodensis	0	2.7409e-07	0	0	7.34895e-06	0	0	2.30231e-07	0	0
Botryotinia fuckeliana partitivirus 1	0	0	0	0	0	0	3.9091e-05	4.60463e-07	0	0
Porcine associated gemycircularvirus 1	0	7.81156e-06	3.65729e-07	0	0	0	0	0	0	0
Pseudomonas phage 71PfluR64PP	0	2.7409e-07	0	0	7.34895e-06	0	0	2.30231e-07	0	0
Landjia hapavirus	0	0	0	0	0	0	3.9091e-05	2.30231e-07	0	0
Tupanvirus soda lake	0	1.05525e-05	0	0	1.02885e-05	0	0	0	0	0
Saint Louis encephalitis virus	0	1.37045e-07	0	0	0	0	3.9091e-05	0	0	0
Bdellovibrio phage phi1422	0	0	0	0	0	0	3.9091e-05	0	0	0
Mycobacterium phage Camperdownii	0	0	0	0	0	0	3.9091e-05	0	0	0
Propionibacterium virus PHL132N00	0	0	0	0	0	0	3.9091e-05	0	0	0
Streptomyces phage Xkcd426	0	0	0	0	0	0	3.9091e-05	0	0	0
Sanxia picorna-like virus 9	0	0	0	0	0	0	3.9091e-05	0	0	0
Sewage-associated circular Duc_viral virus-4	0	0	0	0	0	0	3.9091e-05	0	0	0
Yersinia phage vB_YenP_AP10	0	5.4818e-07	0	0	2.93958e-06	0	1.30303e-05	0	0	4.92595e-06
Ochrobactrum phage POA1180	0	1.37045e-07	0	0	0	0	0	0	0	0
Nile crocodilepox virus	0	5.4818e-07	3.65729e-07	0	4.40937e-06	0	0	0	0	1.64198e-06
Panine alphaherpesvirus 3	0	2.7409e-07	8.7775e-06	0	2.93958e-06	1.17396e-05	1.30303e-05	0	0	1.64198e-06
Erwinia virus Frozen	3.84078e-05	0	0	0	0	0	0	0	0	0
EBPR podovirus 1	0	0	0	0	2.49864e-05	0	1.30303e-05	0	0	0
Sylvanvirus sp.	0	0	0	3.07069e-05	7.34895e-06	0	0	0	0	0
Synechococcus phage S-CAM7	0	0	0	0	4.40937e-06	0	0	0	0	0
Dickeya phage Sucellus	0	0	0	0	0	0	0	0	0	0
Lake Sarah-associated circular virus-50	3.91917e-07	0	2.92583e-06	3.07069e-05	1.46979e-06	0	0	0	0	0
Macacine gammaherpesvirus 5	0	0	0	3.07069e-05	5.87916e-06	0	0	0	0	0
Freshwater phage uvFW-CGR-AMD-COM-C440	0	9.59315e-07	0	0	5.87916e-06	1.67708e-06	0	9.20926e-07	0	0
Phage NCTB	0	0	0	3.07069e-05	5.87916e-06	0	0	0	0	0
Edafosvirus sp.	0	4.11135e-07	0	3.07069e-05	2.93958e-06	0	0	0	0	1.64198e-06
Bemisia-associated genomovirus AdDF	0	0	7.31458e-07	3.07069e-05	4.40937e-06	0	0	0	0	0
Giant panda associated partiti-like virus	0	0	0	0	0	0	2.60607e-05	6.90694e-07	0	6.56793e-06
Bacilladnavirus sp.	1.60686e-05	0	6.58312e-06	0	4.40937e-06	0	0	0	0	4.92595e-06
Apis mellifera associated microvirus 23	0	2.7409e-07	0	0	0	3.52188e-05	0	0	0	0
Culex rhabdovirus	0	0	0	0	0	3.52188e-05	0	2.30231e-07	0	0
Rosellinia necatrix partitivirus 6	0	1.91863e-06	3.65729e-07	0	1.46979e-06	0	0	0	0	0
Yellowstone lake phycodnavirus 1	0	0	0	0	1.46979e-06	0	0	0	0	1.64198e-06
Hepatitis GB virus B	0	0	0	0	2.93958e-06	0	0	0	0	0
Acinetobacter phage SH-Ab 15497	0	0	0	0	1.46979e-06	0	0	0	0	0
Primate tetraparvovirus 1	1.95958e-06	0	1.46292e-06	3.07069e-05	0	0	0	0	0	0
Propionibacterium virus PHL041M10	0	0	0	0	0	0	0	2.30231e-07	0	0
Helicobasidium mompa partitivirus V70	3.91917e-07	6.16702e-06	0	0	0	0	0	0	0	0
Lake Sarah-associated circular molecule 5	3.91917e-07	1.37045e-07	8.04604e-06	0	2.93958e-06	0	0	0	0	1.64198e-06
Gallid alphaherpesvirus 2	0	4.11135e-07	0	0	1.46979e-06	0	0	0	0	0
Sphingobium phage Lacusarx	0	5.4818e-07	0	0	0	0	0	0	0	0
Lasius niger virus 1	0	1.2334e-06	0	0	0	0	0	0	0	0
Roseobacter virus RDJL2	0	0	0	0	1.46979e-06	0	0	0	0	0
Entoleuca partitivirus 2	7.83833e-07	6.85225e-07	0	0	0	0	0	0	0	0
Acinetobacter phage vB_AbaP_Acibel007	0	2.7409e-07	0	0	0	0	0	6.90694e-07	0	0
Sogatella furcifera honeydew virus	0	9.59315e-07	0	0	0	0	0	0	0	0
Propionibacterium virus P1001	0	0	0	0	3.23354e-05	0	0	0	0	0
Chicken astrovirus	0	1.37045e-07	0	0	0	0	0	6.90694e-07	0	0
Molluscum contagiosum virus	3.91917e-07	1.37045e-07	0	0	0	0	0	2.30231e-07	0	0
Pseudomonas phage inbricus	0	0	0	3.07069e-05	0	0	0	0	0	0
Blackbird associated gemycircularvirus 1	0	5.20771e-06	0	0	0	0	0	0	0	0
Fly associated circular virus 2	0	0	0	0	0	0	0	0	0	0
Grapevine partitivirus	0	1.63084e-05	0	0	0	1.67708e-06	1.30303e-05	9.20926e-07	0	0
Acidithiobacillus phage AcaML1	0	0	0	3.07069e-05	1.46979e-06	0	0	0	0	0
Cyanophage KBS-S-1A	0	0	0	3.07069e-05	1.46979e-06	0	0	0	0	0
Pseudogymnoascus destructans partitivirus-pa	0	0	0	3.07069e-05	1.46979e-06	0	0	0	0	0
Singapore grouper iridovirus	0	0	0	0	0	0	0	0	0	0
uncultured Mediterranean phage MEDS1 group	0	0	0	0	0	0	0	0	0	0
Wenzhou tombus-like virus 1	0	0	0	0	1.46979e-06	0	0	0	0	3.28396e-06
Escherichia phage B2	0	0	0	0	0	0	0	0	0	0
Shigella virus EP23	0	0	0	0	0	0	0	0	0	0
Propionibacterium virus Pacnes201215	0	0	0	0	0	0	0	0	0	0
Okra enation leaf curl virus	0	0	0	0	0	0	0	0	0	0
Beihai levi-like virus 24	0	0	0	0	0	0	0	0	0	0
Wilkie qin-like virus	0	0	0	0	0	0	0	0	0	0
Saltwater crocodilepox virus	0	0	0	0	0	0	0	0	0	0
Cactus virus X	0	0	0	0	0	0	0	0	0	0
Mengla dianlovirus	0	0	0	0	0	0	0	0	0	0
White spot syndrome virus	0	0	0	0	4.40937e-06	0	1.30303e-05	0	0	0
Pseudomonas phage PspYZU01	0	9.86724e-06	3.65729e-07	0	4.40937e-06	3.35417e-06	0	0	0	0
Enterobacteria phage EcoDS1	0	0	0	0	0	0	0	0	0	0
uncultured Mediterranean phage uvDeep-CGR2-KM24-C165	0	0	0	0	0	0	0	0	0	0
Culex tritaeniorhynchus rhabdovirus	0	0	0	0	0	0	0	2.30231e-07	0	0
Hubei partiti-like virus 42	0	0	0	0	8.81874e-06	2.18021e-05	0	0	0	0
Sclerotinia gemycircularvirus 1	0	1.37045e-07	0	0	0	0	0	0	0	0
Grapevine Red Globe virus	0	2.7409e-07	0	0	0	0	0	4.60463e-07	0	0
Erwinia phage phiEt88	0	0	0	0	0	0	0	0	0	0
Bacillus phage BSP10	0	0	0	0	0	0	0	0	0	0
Pseudomonas virus KPP12	0	0	0	0	0	0	0	0	0	0
Escherichia virus Seurat	0	0	0	0	0	0	0	0	0	0
Hubei blood fluke virus 3	0	0	0	0	0	0	0	0	0	0
Sewage-associated circular Duc_viral virus-27	0	0	0	0	0	0	0	0	0	0
Vibrio phage 1.121.O._10N.286.46.C4	0	0	0	0	0	0	0	0	0	0
Dyothetapapillomavirus 1	0	0	0	0	0	0	0	0	0	0
Acanthocystis turfacea Chlorella virus Can0610SP	0	0	0	0	0	0	0	0	0	0
Baboon orthoreovirus	0	0	0	0	0	0	0	0	0	0
Murine feces-associated gemycircularvirus 2	0	1.37045e-07	0	3.07069e-05	0	0	0	0	0	0
Hubei macula-like virus 2	0	4.65953e-06	0	0	0	0	2.60607e-05	0	0	0
Pseudomonas phage Noxifer	0	0	0	3.07069e-05	0	0	0	0	0	0
Pseudomonas phage Bf7	0	0	0	3.07069e-05	0	0	0	0	0	0
Tyuleniy virus	0	0	0	3.07069e-05	0	0	0	0	0	0
Magnaporthe oryzae Ruc_viral virus	0	0	0	3.07069e-05	0	0	0	0	0	0
Virus Rctr197k	0	0	0	3.07069e-05	0	0	0	0	0	0
Pepper yellow mosaic virus	0	0	0	3.07069e-05	0	0	0	0	0	0
Grapevine deformation virus	0	0	0	3.07069e-05	0	0	0	0	0	0
Halovirus HGTV-1	0	0	0	0	2.93958e-06	0	2.60607e-05	0	0	0
Dyonupapillomavirus 1	0	0	0	0	2.93958e-05	0	0	0	0	0
Carnation mottle virus	0	0	0	0	2.93958e-06	0	0	0	0	2.62717e-05
Verrucomicrobia phage P8625	0	0	0	0	2.93958e-06	0	2.60607e-05	0	0	0
Mycobacterium phage DrLupo	0	0	0	0	1.46979e-06	0	0	0	0	0
Culex originated Tymoviridae-like virus	0	0	0	0	0	2.85104e-05	0	0	0	0
Oryctes rhinoceros nudivirus	0	1.37045e-07	0	0	0	0	2.60607e-05	0	0	0
Mollivirus sibericum	9.01408e-06	2.7409e-07	3.65729e-07	0	4.40937e-06	0	0	4.60463e-07	0	0
Norwalk virus	0	2.7409e-07	0	0	1.46979e-06	0	1.30303e-05	0	0	0
Hubei partiti-like virus 56	1.52847e-05	1.37045e-07	1.09719e-06	0	2.93958e-06	3.35417e-06	0	4.60463e-07	0	4.92595e-06
Agrobacterium phage Atu_ph04	0	0	0	0	2.7926e-05	0	0	0	0	0
Human associated gemykibivirus 3	0	1.06895e-05	3.65729e-07	0	1.46979e-06	0	1.30303e-05	6.90694e-07	0	1.64198e-06
Bordetella virus LK3	0	0	1.38977e-05	0	1.17583e-05	0	0	0	0	1.64198e-06
Vibrio phage 1.204.O._10N.222.46.F12	0	0	0	0	1.46979e-06	0	2.60607e-05	0	0	0
Vibrio phage pVa-21	0	5.4818e-07	0	0	0	0	0	0	0	0
Staphylococcus virus SEP9	0	5.4818e-07	0	0	0	0	0	0	0	0
Avastrovirus 1	0	0	0	0	0	0	0	4.60463e-07	0	0
Shallot latent virus	3.91917e-07	0	0	0	0	0	0	0	0	0
Pseudomonas virus KPP25	0	0	0	0	1.46979e-06	0	2.60607e-05	0	0	0
Marmot picobirnavirus	0	0	0	0	0	0	0	2.30231e-07	0	0
uncultured Mediterranean phage uvDeep-CGR1-KM17-C101	0	1.37045e-07	0	0	0	0	0	0	0	0
Streptomyces phage BRock	0	2.7409e-07	3.65729e-07	0	0	0	1.30303e-05	0	0	0
Flavobacterium sp. phage 1/32	0	0	0	0	0	0	0	0	0	0
Pseudomonas phage NV1	0	0	0	0	0	0	0	0	0	0
Croceibacter phage P2559Y	0	0	0	0	0	0	0	0	0	0
Yokose virus	0	0	0	0	0	0	0	0	0	0
Pestivirus I	0	0	0	0	0	0	0	0	0	0
Beihai noda-like virus 25	0	0	0	0	0	0	0	0	0	0
Beihai picorna-like virus 69	0	0	0	0	0	0	0	0	0	0
Bovine faeces associated circular Duc_viral virus 2	0	0	0	0	0	0	0	0	0	0
Diporeia-associated CRESS-Duc_viral virus LH481	0	0	0	0	0	0	0	0	0	0
Wenzhou tombus-like virus 3	0	0	0	0	0	0	0	0	0	0
Dyokappapapillomavirus 4	0	0	0	0	0	0	0	0	0	0
Yellowstone lake mimivirus	0	0	0	0	0	0	2.60607e-05	0	0	0
Morganella phage vB_MmoM_MP1	0	0	0	0	0	0	1.30303e-05	0	0	0
Vibrio phage VpKK5	0	0	0	0	1.32281e-05	0	0	0	0	0
Prochlorococcus phage P-SSM2	0	0	0	0	0	0	2.60607e-05	0	0	0
Propionibacterium phage pa28	0	0	0	0	0	0	2.60607e-05	2.30231e-07	0	0
Bacillus phage Moonbeam	0	1.37045e-07	0	0	0	0	2.60607e-05	0	0	0
Rubella virus	0	1.37045e-07	0	0	0	0	2.60607e-05	0	0	0
Blue fish point virus	7.83833e-07	7.26338e-06	2.19437e-06	0	5.87916e-06	3.35417e-06	0	4.3744e-06	0	1.64198e-06
Synechococcus phage S-SSM4	0	0	0	0	0	0	2.60607e-05	0	0	0
Arthrobacter phage Teacup	0	0	0	0	0	0	2.60607e-05	0	0	0
Microbacterium phage Neferthena	0	0	0	0	0	0	2.60607e-05	0	0	0
Hubei noda-like virus 13	0	0	0	0	0	0	2.60607e-05	0	0	0
Bat guano associated nodavirus GF-4n	0	0	0	0	0	0	2.60607e-05	0	0	0
Blattodean ambidensovirus 2	0	0	0	0	0	0	2.60607e-05	0	0	0
Bosavirus sp.	3.91917e-07	8.90792e-06	3.65729e-07	0	0	0	0	2.30231e-07	0	1.64198e-06
Hubei chuvirus-like virus 1	0	0	0	0	0	0	0	2.30231e-07	0	2.46297e-05
Pestivirus A	3.91917e-07	0	2.19437e-06	0	2.93958e-06	0	0	2.30231e-07	0	0
Harvfovirus sp.	0	0	0	0	1.02885e-05	0	0	0	0	0
Sodalis phage phiSG1	0	0	0	0	0	2.34792e-05	0	0	0	0
Tetraselmis virus 1	0	0	3.65729e-07	0	2.20469e-05	0	0	2.30231e-07	0	0
Streptomyces phage Shawty	7.83833e-07	0	0	0	2.20469e-05	0	0	0	0	0
Klosneuvirus KNV1	0	0	0	0	1.76375e-05	0	0	2.30231e-07	0	3.28396e-06
Lake Sarah-associated circular virus-5	9.79792e-06	0	8.04604e-06	0	0	0	0	0	0	0
Bodo saltans virus	0	0	5.12021e-06	0	1.46979e-05	0	0	2.30231e-07	0	1.64198e-06
Felis catus gammaherpesvirus 1	0	1.37045e-07	0	0	2.20469e-05	0	0	0	0	0
Salvia divinorum Ruc_viral virus 1	0	1.86381e-05	0	0	2.93958e-06	0	0	2.30231e-07	0	0
Tsukamurella phage TPA4	0	0	0	0	2.20469e-05	0	0	0	0	0
Densovirinae sp.	0	0	3.65729e-06	0	4.40937e-06	0	0	0	0	0
Caudovirales sp.	0	0	0	0	2.05771e-05	0	0	9.20926e-07	0	0
Ralstonia virus RSL1	0	0	0	0	7.34895e-06	0	0	0	0	0
Thosea asigna virus	7.83833e-07	1.39786e-05	0	0	2.93958e-06	0	0	0	0	3.28396e-06
Corynebacterium phage Kimchi1738	0	0	3.65729e-07	0	0	0	1.30303e-05	2.30231e-07	0	4.92595e-06
Prochlorococcus phage P-SSM7	0	1.37045e-07	0	0	2.05771e-05	0	0	0	0	0
Bat mastadenovirus	0	0	0	0	2.05771e-05	0	0	0	0	0
Moumouvirus	0	0	0	0	4.40937e-06	0	1.30303e-05	2.30231e-07	0	1.64198e-06
Cyanophage PSS2	0	0	0	0	5.87916e-06	0	0	0	0	0
Human associated gemykibivirus 2	1.56767e-05	9.59315e-07	0	0	0	0	0	0	0	3.28396e-06
Sewage-associated gemycircularvirus 7	0	3.15203e-06	0	0	1.46979e-06	0	0	0	0	1.64198e-06
Synechococcus phage S-EIVl	0	0	0	0	1.02885e-05	0	0	0	0	0
Aureococcus anophagefferens virus	0	5.4818e-07	3.65729e-07	0	2.93958e-06	0	1.30303e-05	2.30231e-07	0	0
Idiomarinaceae phage 1N2-2	0	0	0	0	1.76375e-05	0	0	0	0	0
Siphoviridae environmental samples	0	1.37045e-07	0	0	2.93958e-06	0	1.30303e-05	0	0	0
Paramecium bursaria Chlorella virus NY2A	0	0	0	0	5.87916e-06	0	0	0	0	0
Blattodean ambidensovirus 1	3.91917e-07	0	7.31458e-07	0	0	5.03125e-06	1.30303e-05	0	0	0
Organic Lake phycodnavirus 2	0	0	0	0	4.40937e-06	0	0	0	0	0
Caulobacter phage Cd1	0	0	0	0	1.91073e-05	0	0	0	0	0
Mink circovirus	3.91917e-07	1.37045e-07	0	0	0	1.84479e-05	0	0	0	0
Bat circovirus POA/2012/I	2.74342e-06	0	1.09719e-06	0	0	1.50938e-05	0	0	0	0
Cyanophage S-TIM5	0	4.11135e-07	0	0	0	0	0	0	0	0
Organic Lake virophage	0	0	0	0	0	0	0	0	0	4.92595e-06
Lone star tick densovirus 1	3.13533e-06	2.7409e-07	9.14322e-06	0	5.87916e-06	0	0	0	0	0
Propionibacterium phage Leviosa	0	0	0	0	0	0	1.30303e-05	2.30231e-07	0	4.92595e-06
Meiothermus phage MMP17	0	0	0	0	1.46979e-06	0	1.30303e-05	2.30231e-07	0	3.28396e-06
Pteropus associated gemycircularvirus 6	0	1.78158e-06	0	0	1.46979e-06	1.67708e-06	1.30303e-05	0	0	0
Homavirus sp.	0	0	0	0	2.93958e-06	0	0	0	0	0
Delftia phage RG-2014	0	0	0	0	1.46979e-06	0	0	0	0	0
Mimivirus AB-566-O17	0	0	0	0	1.46979e-05	1.67708e-06	0	2.30231e-07	0	0
Pseudomonas phage PMBT3	0	0	0	0	4.40937e-06	0	1.30303e-05	0	0	0
Yellowstone lake phycodnavirus 3	0	0	0	0	2.93958e-06	0	0	0	0	0
Zhejiang gunthers frog astrovirus	0	0	0	0	1.76375e-05	0	0	0	0	0
Lymantria xylina nucleopolyhedrovirus	0	0	0	0	1.76375e-05	0	0	0	0	0
Niehaus virus	0	3.28908e-06	3.65729e-07	0	0	0	0	2.30231e-07	0	0
Solumvirus sp.	0	0	0	0	4.40937e-06	0	1.30303e-05	0	0	0
Synechococcus T7-like virus S-TIP37	0	0	0	0	0	0	1.30303e-05	2.30231e-07	0	0
Synechococcus phage S-RIM2	0	0	0	0	2.93958e-06	0	0	0	0	0
Gordonia phage GMA6	0	0	0	0	0	0	0	0	0	0
Pseudomonas phage phiPsa374	0	0	0	0	0	0	0	0	0	1.64198e-05
Gordonia phage GMA1	0	1.37045e-07	0	0	2.93958e-06	0	0	0	0	0
Micromonas pusilla virus SP1 sensu lato	0	0	0	0	1.61677e-05	0	0	4.60463e-07	0	0
Linepithema humile picorna-like virus 1	0	2.7409e-06	0	0	0	0	0	0	0	0
Simian immunodeficiency virus	0	1.37045e-07	3.65729e-07	0	1.46979e-06	0	0	0	0	0
Human gammaherpesvirus 4	0	2.7409e-07	3.65729e-07	0	1.46979e-06	0	1.30303e-05	9.20926e-07	0	0
Hubei chipolycivirus	0	0	0	0	0	0	0	2.76278e-06	0	0
Circoviridae batCV-SC703	3.52725e-06	0	6.21739e-06	0	2.93958e-06	0	0	2.30231e-07	0	1.64198e-06
Cercopithecine alphaherpesvirus 2	0	1.37045e-07	1.09719e-06	0	1.46979e-06	0	0	0	0	0
Hepatitis delta virus	0	0	0	0	1.46979e-06	0	0	0	0	0
Quang Binh virus	0	2.60385e-06	0	0	0	0	0	0	0	0
Propionibacterium phage LilBandit	0	0	0	0	1.46979e-06	0	1.30303e-05	0	0	1.64198e-06
Avian avulavirus 1	0	1.37045e-07	0	0	2.93958e-06	0	1.30303e-05	0	0	0
Arthrobacter phage vB_ArS-ArV2	0	0	0	0	2.93958e-06	0	1.30303e-05	0	0	0
Virus Rctr71	0	0	0	0	2.93958e-06	0	1.30303e-05	0	0	0
Aphid lethal paralysis virus	0	1.37045e-07	7.31458e-07	0	1.46979e-06	0	1.30303e-05	0	0	0
Cronobacter virus CR9	0	0	0	0	0	0	0	0	0	1.47778e-05
Vibrio phage VvAW1	0	1.37045e-07	0	0	1.17583e-05	0	0	0	0	1.64198e-06
Bat circovirus	7.83833e-07	4.11135e-07	1.82864e-06	0	5.87916e-06	1.67708e-06	0	0	0	0
Rhodococcus phage Trina	0	0	0	0	1.46979e-05	0	0	6.90694e-07	0	0
uncultured phage MedDCM-OCT-S09-C299	0	0	3.65729e-07	0	0	0	1.30303e-05	2.30231e-07	0	0
Eastern grey kangaroopox virus	0	0	0	0	1.46979e-06	0	0	4.60463e-07	0	0
Thrips-associated genomovirus 1	0	1.78158e-06	0	0	0	0	0	0	0	0
Tsukamurella phage TPA2	0	0	0	0	1.46979e-06	0	0	0	0	0
Synechococcus phage S-SSM7	0	1.37045e-07	0	0	0	0	1.30303e-05	6.90694e-07	0	0
Hubei partiti-like virus 8	0	2.19272e-06	0	0	0	0	1.30303e-05	0	0	0
Yaounde virus	0	0	0	0	0	0	0	0	0	1.64198e-06
Inoviridae sp.	0	0	3.65729e-07	0	1.46979e-06	0	1.30303e-05	0	0	0
Synechococcus phage S-CAM1	0	0	0	0	1.46979e-06	0	1.30303e-05	0	0	0
Mycobacterium phage Phasih	0	5.4818e-07	0	0	1.46979e-06	0	1.30303e-05	0	0	0
Gokushovirinae Bog1183_53	0	0	0	0	1.46979e-06	0	0	0	0	0
Epichloe festucae virus 1	0	0	0	0	1.46979e-06	0	0	0	0	0
Mimivirus sp. SH	0	0	0	0	0	0	0	0	0	0
Vibrio phage CHOED	0	0	1.09719e-06	0	0	0	0	0	0	0
Bee Macula-Like virus 2	0	1.37045e-06	0	0	0	0	0	0	0	0
Synechococcus phage S-CRM01	0	4.11135e-07	3.65729e-07	0	0	0	0	0	0	0
Microbacterium phage Paschalis	0	4.11135e-07	0	0	1.46979e-06	0	1.30303e-05	0	0	0
Prochlorococcus phage P-TIM68	0	2.7409e-07	3.65729e-07	0	0	0	0	0	0	0
Leviviridae sp.	0	0	0	0	2.93958e-06	1.17396e-05	0	0	0	0
Wenzhou noda-like virus 6	0	0	1.09719e-06	0	0	0	0	0	0	0
Sapporo virus	0	0	0	0	1.46979e-06	0	1.30303e-05	0	0	0
Vibrio phage 1.264.O._10N.286.51.F2	0	0	0	0	1.46979e-06	0	1.30303e-05	0	0	0
Bat circovirus POA/2012/V	3.91917e-06	0	2.92583e-06	0	0	5.03125e-06	0	2.30231e-07	0	1.64198e-06
Sewage derived gemygorvirus 1	0	6.85225e-07	0	0	0	0	0	0	0	0
Yellowstone lake phycodnavirus 2	0	0	0	0	0	0	0	0	0	0
Sewage derived gemycircularvirus 3	0	1.37045e-05	3.65729e-07	0	0	0	0	0	0	0
Beak and feather disease virus	2.3515e-06	0	4.75448e-06	0	2.93958e-06	0	0	0	0	1.64198e-06
Giant panda associated gemycircularvirus	5.09492e-06	5.20771e-06	0	0	0	0	0	0	0	1.64198e-06
Iodobacteriophage phiPLPE	0	0	3.65729e-07	0	0	0	0	0	0	0
Bacillus virus Grass	0	0	3.65729e-07	0	0	0	0	0	0	0
Setosphaeria turcica ambiguivirus 1	7.83833e-07	0	0	0	0	0	0	0	0	1.31359e-05
Wheat dwarf virus	0	0	0	0	0	0	0	0	0	0
Barley yellow dwarf virus PAV	0	0	0	0	0	0	0	0	0	0
Cotesia vestalis bracovirus	0	0	0	0	0	0	0	0	0	0
Atractylodes mottle virus	0	0	0	0	0	0	0	0	0	0
Human associated porprismacovirus 1	0	2.7409e-07	0	0	0	0	0	0	0	0
Cucurbit chlorotic yellows virus	0	0	0	0	0	0	0	2.30231e-07	0	0
Porcine parvovirus 5	0	0	0	0	0	0	0	2.30231e-07	0	0
Human orthopneumovirus	0	0	0	0	0	0	1.30303e-05	6.90694e-07	0	0
Campylobacter virus IBB35	0	1.37045e-07	0	0	0	0	0	0	0	0
Aeromonas phage 62AhydR11PP	0	0	0	0	0	0	0	0	0	0
Bacillus virus G	0	0	0	0	0	0	0	0	0	0
Sinorhizobium phage phiM9	0	0	0	0	0	0	0	0	0	0
Vibrio phage vB_VmeM-32	0	0	0	0	0	0	0	0	0	0
Erwinia phage vB_EamM_Caitlin	0	0	0	0	0	0	0	0	0	0
Podovirus GOM	0	0	0	0	0	0	0	0	0	0
Sinorhizobium phage PBC5	0	0	0	0	0	0	0	0	0	0
Vibrio phage PVA1	0	0	0	0	0	0	0	0	0	0
Erwinia phage vB_EamP-S2	0	0	0	0	0	0	0	0	0	0
Yersinia phage Yep-phi	0	0	0	0	0	0	0	0	0	0
Streptomyces virus Sujidade	0	0	0	0	0	0	0	0	0	0
Bacillus phage vB_BpsS-36	0	0	0	0	0	0	0	0	0	0
Gordonia phage Suzy	0	0	0	0	0	0	0	0	0	0
Mycobacterium phage Adler	0	0	0	0	0	0	0	0	0	0
Mycobacterium phage Sparky	0	0	0	0	0	0	0	0	0	0
Phage 5P_3	0	0	0	0	0	0	0	0	0	0
Pseudoalteromonas phage PHS3	0	0	0	0	0	0	0	0	0	0
Propionibacterium virus Attacne	0	0	0	0	0	0	0	0	0	0
Bovine alphaherpesvirus 1	0	0	0	0	0	0	0	0	0	0
Bubaline alphaherpesvirus 1	0	0	0	0	0	0	0	0	0	0
Giant panda anellovirus	0	0	0	0	0	0	0	0	0	0
Choristoneura fumiferana multiple nucleopolyhedrovirus	0	0	0	0	0	0	0	0	0	0
Maruca vitrata nucleopolyhedrovirus	0	0	0	0	0	0	0	0	0	0
Cryphonectria nitschkei chrysovirus 1	0	0	0	0	0	0	0	0	0	0
Penicillium raistrickii chrysovirus 1	0	0	0	0	0	0	0	0	0	0
Flavivirus Anopheles/PV-Am/ITA/2009	0	0	0	0	0	0	0	0	0	0
Kedougou virus	0	0	0	0	0	0	0	0	0	0
Ntaya virus	0	0	0	0	0	0	0	0	0	0
T'Ho virus	0	0	0	0	0	0	0	0	0	0
Rodent pegivirus	0	0	0	0	0	0	0	0	0	0
German gecko ranavirus	0	0	0	0	0	0	0	0	0	0
Beihai hermit crab virus 3	0	0	0	0	0	0	0	0	0	0
Beihai picorna-like virus 33	0	0	0	0	0	0	0	0	0	0
Beihai sphaeromadae virus 4	0	0	0	0	0	0	0	0	0	0
Beihai tombus-like virus 1	0	0	0	0	0	0	0	0	0	0
Escherichia phage vB_EcoM_IME392	0	0	0	0	0	0	0	0	0	0
Nai virus	0	0	0	0	0	0	0	0	0	0
Soybean leaf-associated ssRuc_viral virus 1	0	0	0	0	0	0	0	0	0	0
Verticillium dahliae Ruc_viral virus	0	0	0	0	0	0	0	0	0	0
Vibrio phage 1.032.O._10N.261.54.F5	0	0	0	0	0	0	0	0	0	0
Wolbachia phage WO	0	0	0	0	0	0	0	0	0	0
uncultured Mediterranean phage uvDeep-CGR2-AD3-C191	0	0	0	0	0	0	0	0	0	0
Covert mortality nodavirus	0	0	0	0	0	0	0	0	0	0
Chipapillomavirus 3	0	0	0	0	0	0	0	0	0	0
Pear alphapartitivirus	0	0	0	0	0	0	0	0	0	0
Colletotrichum eremochloae partitivirus 1	0	0	0	0	0	0	0	0	0	0
Ustilaginoidea virens partitivirus 2	0	0	0	0	0	0	0	0	0	0
Cedratvirus Zaza IHUMI	0	0	0	0	0	0	0	0	0	0
Sweet potato feathery mottle virus	0	0	0	0	0	0	0	0	0	0
Cypovirus 4	0	0	0	0	0	0	0	0	0	0
Beet black scorch virus	0	0	0	0	0	0	0	0	0	0
Sclerotinia sclerotiorum umbra-like virus 1	0	0	0	0	0	0	0	0	0	0
Camponotus yamaokai virus	0	0	0	0	0	0	0	0	0	0
Aspergillus foetidus slow virus 1	0	0	0	0	0	0	0	0	0	0
Chalara elegans Ruc_viral Virus 1	0	0	0	0	0	0	0	0	0	0
Sclerotinia sclerotiorum victorivirus 1	0	0	0	0	0	0	0	0	0	0
Rous sarcoma virus	0	0	0	0	0	0	0	0	0	0
Primate T-lymphotropic virus 3	0	0	0	0	0	0	0	0	0	0
Gibbon ape leukemia virus	0	0	0	0	0	0	0	0	0	0
Barns Ness breadcrumb sponge aquatic picorna-like virus 3	0	0	0	0	0	0	0	0	0	0
Cardiovirus B	0	0	0	0	0	0	0	0	0	0
Paramushir virus	0	0	0	0	0	0	0	0	0	0
Main Drain orthobunyavirus	0	0	0	0	0	0	0	0	0	0
Cumuto goukovirus	0	0	0	0	0	0	0	0	0	0
Malsoor virus	0	0	0	0	0	0	0	0	0	0
Marburg marburgvirus	0	0	0	0	0	0	0	0	0	0
Cyanophage S-RIM32	0	1.37045e-07	0	0	0	0	1.30303e-05	0	0	0
Psittacine adenovirus 1	3.91917e-07	0	0	0	0	0	1.30303e-05	0	0	0
Apis mellifera associated microvirus 3	0	0	0	0	0	1.34167e-05	0	0	0	0
Hubei sobemo-like virus 46	0	0	1.17033e-05	0	0	0	0	0	0	1.64198e-06
Stenotrophomonas phage IME-SM1	0	0	0	0	0	0	1.30303e-05	0	0	0
Klebsiella virus KP32	0	0	0	0	0	0	1.30303e-05	0	0	0
Sphingomonas phage Scott	0	0	0	0	0	0	1.30303e-05	0	0	0
Gordonia phage Gsput1	0	0	0	0	0	0	1.30303e-05	0	0	0
Vibrio phage 1.208.B._10N.222.52.A7	0	0	0	0	0	0	1.30303e-05	0	0	0
Rabies lyssavirus	0	0	0	0	0	0	1.30303e-05	0	0	0
Pectobacterium phage CBB	0	2.7409e-07	0	0	0	0	1.30303e-05	0	0	0
Elephant endotheliotropic herpesvirus 4	0	0	0	0	0	0	1.30303e-05	2.30231e-07	0	0
Pectobacterium bacteriophage PM2	0	0	0	0	1.32281e-05	0	0	0	0	0
Seal parapoxvirus	0	0	0	0	1.32281e-05	0	0	0	0	0
Xysticus cristatus iflavirus	0	1.13747e-05	3.65729e-07	0	1.46979e-06	0	0	0	0	0
Pleurochrysis sp. endemic virus 2	0	1.37045e-07	0	0	0	0	1.30303e-05	0	0	0
Diadromus pulchellus toursvirus	0	0	0	0	0	0	0	0	0	1.31359e-05
Myxococcus phage Mx8	0	0	0	0	0	0	1.30303e-05	0	0	0
Synechococcus T7-like virus S-TIP46	0	0	0	0	0	0	1.30303e-05	0	0	0
Dickeya phage Ninurta	0	0	0	0	0	0	1.30303e-05	0	0	0
Arthrobacter phage Nightmare	0	0	0	0	0	0	1.30303e-05	0	0	0
Gordonia phage Mutzi	0	0	0	0	0	0	1.30303e-05	0	0	0
Gordonia phage Orchid	0	0	0	0	0	0	1.30303e-05	0	0	0
Lactococcus phage P162	0	0	0	0	0	0	1.30303e-05	0	0	0
Propionibacterium phage PHL082M02	0	0	0	0	0	0	1.30303e-05	0	0	0
Escherichia phage vB_EcoS Sa179lw	0	0	0	0	0	0	1.30303e-05	0	0	0
Salmonella virus VSt472	0	0	0	0	0	0	1.30303e-05	0	0	0
Mycobacterium virus Rey	0	0	0	0	0	0	1.30303e-05	0	0	0
Mycobacterium phage Validus	0	0	0	0	0	0	1.30303e-05	0	0	0
Cervid alphaherpesvirus 1	0	0	0	0	0	0	1.30303e-05	0	0	0
Helicoverpa armigera granulovirus	0	0	0	0	0	0	1.30303e-05	0	0	0
Duck calicivirus	0	0	0	0	0	0	1.30303e-05	0	0	0
Bat hepacivirus	0	0	0	0	0	0	1.30303e-05	0	0	0
Pteropus associated gemycircularvirus 3	0	0	0	0	0	0	1.30303e-05	0	0	0
Orthohepevirus D	0	0	0	0	0	0	1.30303e-05	0	0	0
Beihai sphaeromadae virus 2	0	0	0	0	0	0	1.30303e-05	0	0	0
Lake Sarah-associated circular virus-45	0	0	0	0	0	0	1.30303e-05	0	0	0
Ubei picorna-like virus 3	0	0	0	0	0	0	1.30303e-05	0	0	0
Vibrio phage 1.060.A._10N.261.48.B5	0	0	0	0	0	0	1.30303e-05	0	0	0
Wenling partiti-like virus 9	0	0	0	0	0	0	1.30303e-05	0	0	0
Bluetongue virus	0	0	0	0	0	0	1.30303e-05	0	0	0
Washington bat picornavirus	0	0	0	0	0	0	1.30303e-05	0	0	0
Canine morbillivirus	0	0	0	0	0	0	1.30303e-05	0	0	0
Wenling tonguesole paramyxovirus	0	0	0	0	0	0	1.30303e-05	0	0	0
Carp sprivivirus	0	0	0	0	0	0	1.30303e-05	0	0	0
Beihai noda-like virus 30	3.91917e-07	1.17859e-05	0	0	0	0	0	2.30231e-07	0	0
Bombus cryptarum densovirus	8.62217e-06	2.7409e-07	4.02302e-06	0	0	0	0	0	0	0
Paramecium bursaria Chlorella virus 1	7.83833e-07	1.37045e-07	0	0	2.93958e-06	0	0	9.20926e-07	0	3.28396e-06
Lake Sarah-associated circular molecule 2	2.74342e-06	0	5.12021e-06	0	2.93958e-06	0	0	0	0	0
Shigella phage Sf11 SMD-2017	1.21494e-05	0	0	0	0	0	0	0	0	0
Carrot Ch virus 1	0	7.26338e-06	0	0	1.46979e-06	3.35417e-06	0	0	0	0
Pegivirus C	0	0	0	0	1.17583e-05	0	0	0	0	0
Small ruminant morbillivirus	0	0	0	0	1.17583e-05	0	0	0	0	0
Agrobacterium phage 7-7-1	0	2.7409e-07	3.65729e-07	0	1.46979e-06	0	0	0	0	9.85189e-06
Ohlsdorf virus	3.91917e-07	2.05567e-06	8.7775e-06	0	0	0	0	0	0	0
Ralstonia virus RSF1	0	0	0	0	1.17583e-05	0	0	0	0	0
Gordonia phage Phinally	0	0	0	0	1.17583e-05	0	0	0	0	0
Molossus molossus circovirus 1	0	0	6.94885e-06	0	1.46979e-06	0	0	0	0	3.28396e-06
Marinobacter phage PS6	0	6.30407e-06	0	0	2.93958e-06	1.67708e-06	0	6.90694e-07	0	0
Pigeon circovirus	3.13533e-06	0	2.5601e-06	0	2.93958e-06	0	0	0	0	0
Propionibacterium phage pa63	0	1.37045e-07	1.13376e-05	0	0	0	0	0	0	0
Human blood-associated dicistrovirus	0	0	0	0	0	0	0	0	0	9.85189e-06
Enterobacteria phage vB_EcoP_IME390	0	4.11135e-07	0	0	1.02885e-05	0	0	2.30231e-07	0	0
Streptomyces phage FlowerPower	0	1.91863e-06	0	0	0	0	0	0	0	0
Canarypox virus	7.83833e-07	0	7.31458e-07	0	8.81874e-06	0	0	0	0	0
Xylella phage Salvo	0	0	0	0	1.02885e-05	0	0	0	0	0
Acanthamoeba polyphaga moumouvirus	0	1.37045e-07	0	0	1.02885e-05	0	0	0	0	0
Bordetella phage vB_BbrM_PHB04	0	0	0	0	1.02885e-05	0	0	0	0	0
Pseudomonas phage JG054	0	0	0	0	1.02885e-05	0	0	0	0	0
Pinela virus	0	0	0	0	0	0	0	2.30231e-07	0	9.85189e-06
Porcine parvovirus 3	0	0	0	0	0	1.00625e-05	0	0	0	0
Pseudomonas phage vB_PaeS_S218	0	0	0	0	1.46979e-06	6.70834e-06	0	6.90694e-07	0	0
Partitivirus-like Culex mosquito virus	3.13533e-06	0	0	0	0	0	0	2.30231e-07	0	6.56793e-06
Cucurbitaria piceae virus 1	5.09492e-06	9.59315e-07	3.65729e-07	0	2.93958e-06	0	0	0	0	0
Propionibacterium virus PHL152M00	0	0	0	0	7.34895e-06	0	0	0	0	1.64198e-06
Mycobacterium phage Tonenili	0	0	0	0	8.81874e-06	0	0	0	0	0
uncultured Mediterranean phage uvDeep-CGR2-KM19-C184	0	0	0	0	4.40937e-06	0	0	0	0	0
Newfield virus	0	8.2227e-06	0	0	0	0	0	6.90694e-07	0	0
Corynebacterium phage P1201	0	0	0	0	0	0	0	0	0	0
Blackbird associated gemykibivirus 1	3.91917e-07	6.44111e-06	3.65729e-07	0	0	0	0	0	0	1.64198e-06
Yersinia phage phiR201	0	0	0	0	8.81874e-06	0	0	0	0	0
Pseudomonas virus Yua	0	0	0	0	8.81874e-06	0	0	0	0	0
Wuhan Insect virus 7	0	0	0	0	8.81874e-06	0	0	0	0	0
Wuhan arthropod virus 4	0	2.60385e-06	1.09719e-06	0	0	0	0	4.60463e-06	0	0
Corynebacterium phage IME1320_01	0	0	0	0	7.34895e-06	0	0	6.90694e-07	0	0
Lutzomyia nodavirus	0	4.65953e-06	0	0	2.93958e-06	0	0	6.90694e-07	0	0
Cattle blood-associated gemycircularvirus	0	8.2227e-06	0	0	0	0	0	0	0	0
Ralstonia phage RSP15	0	0	0	0	5.87916e-06	0	0	0	0	0
uncultured phycodnavirus	0	9.59315e-07	0	0	0	0	0	0	0	0
Microcystis phage Me-ZS1	0	0	0	0	2.93958e-06	0	0	0	0	0
Ovine gammaherpesvirus 2	0	0	0	0	7.34895e-06	0	0	6.90694e-07	0	0
Sanxia water strider virus 10	0	5.4818e-07	0	0	0	0	0	9.20926e-07	0	6.56793e-06
Sierra dome spider associated circular virus 1	0	6.44111e-06	0	0	1.46979e-06	0	0	0	0	0
EBPR podovirus 2	0	2.7409e-07	0	0	7.34895e-06	0	0	0	0	0
Gordonia phage Flapper	0	5.4818e-07	0	0	7.34895e-06	0	0	0	0	0
Propionibacterium virus PHL171M01	0	0	0	0	5.87916e-06	1.67708e-06	0	0	0	0
Wenzhou shrimp virus 6	7.83833e-06	0	0	0	0	0	0	0	0	0
Pseudomonas phage phiPMW	0	1.37045e-07	0	0	1.46979e-06	0	0	4.60463e-07	0	0
Streptomyces phage BillNye	0	1.37045e-07	7.31458e-07	0	4.40937e-06	0	0	2.30231e-07	0	0
Escherichia phage CMSTMSU	0	0	0	0	7.34895e-06	0	0	0	0	0
Tupanvirus deep ocean	0	0	0	0	7.34895e-06	0	0	0	0	0
Porcine epidemic diarrhea virus	0	0	0	0	7.34895e-06	0	0	2.30231e-07	0	0
Dinoroseobacter phage vB_DshS-R5C	0	0	0	0	4.40937e-06	0	0	0	0	0
Hubei partiti-like virus 43	0	5.4818e-07	0	0	2.93958e-06	1.67708e-06	0	4.60463e-07	0	1.64198e-06
Cellulophaga phage phi38:1	0	0	0	0	1.46979e-06	0	0	0	0	0
Lymphocystis disease virus Sa	0	1.37045e-07	0	0	7.34895e-06	0	0	0	0	0
Ixodes scapularis associated virus 2	0	2.19272e-06	3.65729e-07	0	1.46979e-06	0	0	3.45347e-06	0	0
Hubei levi-like virus 6	7.0545e-06	0	3.65729e-07	0	0	0	0	0	0	0
Hubei partiti-like virus 1	0	0	0	0	0	0	0	0	0	1.64198e-06
Acinetobacter phage Acj9	0	0	0	0	7.34895e-06	0	0	0	0	0
Synechococcus phage Syn19	0	0	0	0	7.34895e-06	0	0	0	0	0
Burkholderia virus phi52237	0	0	0	0	7.34895e-06	0	0	0	0	0
Caulobacter phage CcrColossus	0	0	0	0	7.34895e-06	0	0	0	0	0
Mycobacterium phage Collard	0	0	0	0	7.34895e-06	0	0	0	0	0
Penicillium brasilianum partitivirus 1	0	0	0	0	7.34895e-06	0	0	0	0	0
Caprine arthritis encephalitis virus	0	0	0	0	7.34895e-06	0	0	0	0	0
Darwin bee virus 7	0	0	6.94885e-06	0	0	0	0	0	0	0
Pseudoalteromonas phage J2-1	0	0	0	0	1.46979e-06	0	0	0	0	3.28396e-06
Thrips-associated genomovirus 3	0	4.93362e-06	3.65729e-07	0	1.46979e-06	0	0	2.30231e-07	0	0
Black robin associated gemykibivirus 1	3.91917e-07	3.56317e-06	0	0	0	0	0	0	0	0
Thermus phage YS40_Isch	0	0	3.65729e-07	0	5.87916e-06	0	0	0	0	0
Micromonas sp. RCC1109 virus MpV1	0	0	0	0	0	5.03125e-06	0	0	0	0
Podovirus Lau218	0	0	0	0	0	6.70834e-06	0	0	0	0
Hubei odonate virus 10	0	0	0	0	0	6.70834e-06	0	0	0	0
Beatrice Hill tibrovirus	0	0	0	0	0	6.70834e-06	0	0	0	0
Pontimonas phage phiPsal1	0	1.37045e-07	0	0	1.46979e-06	0	0	4.60463e-07	0	0
Genomoviridae sp.	0	1.91863e-06	0	0	0	0	0	0	0	3.28396e-06
Faunusvirus sp.	3.91917e-07	0	7.31458e-07	0	2.93958e-06	0	0	2.30231e-07	0	0
Chelonid alphaherpesvirus 5	0	0	6.58312e-06	0	0	0	0	0	0	0
Hubei tombus-like virus 12	0	0	0	0	0	0	0	0	0	6.56793e-06
Paracoccus phage vB_PmaS-R3	0	0	0	0	4.40937e-06	0	0	0	0	0
Macrophomina phaseolina single-stranded Ruc_viral virus 3	0	0	0	0	1.46979e-06	0	0	0	0	4.92595e-06
Rhinolophus associated gemykibivirus 2	0	4.65953e-06	0	0	1.46979e-06	0	0	2.30231e-07	0	0
Wuhan mosquito orthophasmavirus 1	0	1.50749e-06	0	0	2.93958e-06	1.67708e-06	0	2.30231e-07	0	0
Goat erythroparvovirus	0	4.11135e-07	0	0	5.87916e-06	0	0	0	0	0
Zhee Mosquito virus	0	6.02998e-06	0	0	0	0	0	2.30231e-07	0	0
Klebsiella phage Seifer	0	0	0	0	4.40937e-06	0	0	9.20926e-07	0	0
Prochlorococcus phage MED4-213	0	0	0	0	0	0	0	6.90694e-07	0	4.92595e-06
Aeromonas phage Aswh_1	0	0	0	0	2.93958e-06	0	0	0	0	0
Pseudomonas phage phiPto-bp6g	0	0	0	0	0	0	0	0	0	0
Acinetobacter phage phiAC-1	0	1.37045e-07	0	0	5.87916e-06	0	0	0	0	0
Citrobacter phage CR8	0	1.37045e-07	0	0	0	0	0	0	0	3.28396e-06
Bacillus phage Eldridge	0	0	0	0	5.87916e-06	0	0	0	0	0
Klebsiella phage vB_Kpn_F48	0	0	0	0	5.87916e-06	0	0	0	0	0
Pelagibacter phage HTVC011P	0	0	0	0	5.87916e-06	0	0	0	0	0
Mycobacterium virus Yoshi	0	0	0	0	5.87916e-06	0	0	0	0	0
Xanthomonas phage Xoo-sp2	0	0	0	0	5.87916e-06	0	0	0	0	0
Rhodobacter virus RcSpartan	0	0	0	0	5.87916e-06	0	0	0	0	0
Changping Tick Virus 3	0	0	0	0	5.87916e-06	0	0	0	0	0
Beta vulgaris mitovirus 1	0	0	0	0	5.87916e-06	0	0	0	0	0
Ostreococcus tauri virus OtV5	0	0	0	0	5.87916e-06	0	0	0	0	0
Arthrobacter phage Andrew	0	1.37045e-07	0	0	1.46979e-06	0	0	0	0	1.64198e-06
Lysoka partiti-like virus	0	0	0	0	0	0	0	0	0	4.92595e-06
Pseudoalteromonas phage C7	0	0	4.02302e-06	0	0	0	0	0	0	1.64198e-06
Celeribacter phage P12053L	0	1.37045e-07	0	0	0	0	0	0	0	0
Brevibacillus phage Sundance	3.91917e-07	0	0	0	1.46979e-06	0	0	0	0	0
Synechococcus phage ACG-2014d	0	0	0	0	1.46979e-06	0	0	2.30231e-07	0	3.28396e-06
Vibrio phage vB_VorS-PVo5	0	2.7409e-06	0	0	0	0	0	0	0	1.64198e-06
Hubei sobemo-like virus 9	0	1.37045e-06	3.65729e-07	0	1.46979e-06	0	0	1.15116e-06	0	0
Mycobacterium phage IronMan	0	0	0	0	1.46979e-06	0	0	0	0	0
Cosavirus B	5.48683e-06	0	0	0	0	0	0	0	0	0
Aeromonas phage phiAS5	0	1.91863e-06	3.65729e-07	0	1.46979e-06	0	0	0	0	0
Hubei partiti-like virus 40	0	1.37045e-07	0	0	0	0	0	2.30231e-07	0	3.28396e-06
Human associated gemykibivirus 5	3.91917e-07	4.11135e-06	0	0	0	0	0	0	0	0
Rat associated gemycircularvirus 1	0	3.56317e-06	0	0	1.46979e-06	0	0	0	0	0
Escherichia phage K1-ind(3)	0	0	3.65729e-07	0	0	0	0	0	0	4.92595e-06
Caledonia beadlet anemone Nora virus-like virus 1	0	2.87794e-06	7.31458e-07	0	0	0	0	0	0	1.64198e-06
Cyanophage S-RIM14	0	0	0	0	1.46979e-06	0	0	0	0	0
Vibrio phage VD1	0	0	0	0	0	0	0	0	0	0
Pityohyphantes rubrofasciatus iflavirus	0	1.50749e-06	0	0	2.93958e-06	0	0	6.90694e-07	0	0
Circoviridae TaCV2	1.17575e-06	0	2.19437e-06	0	1.46979e-06	0	0	0	0	0
Wenzhou picorna-like virus 47	5.09492e-06	0	0	0	0	0	0	0	0	0
Propionibacterium phage BruceLethal	0	0	0	0	1.46979e-06	0	0	4.60463e-07	0	0
Rhizobium phage vB_RglS_P106B	0	1.37045e-07	0	0	2.93958e-06	0	0	0	0	0
Myrmica scabrinodis virus 2	3.91917e-07	4.65953e-06	0	0	0	0	0	0	0	0
Apis mellifera associated microvirus 31	0	0	0	0	0	5.03125e-06	0	0	0	0
Moumouvirus goulette	0	0	0	0	2.93958e-06	0	0	2.07208e-06	0	0
Propionibacterium virus PHL111M01	0	2.7409e-07	0	0	4.40937e-06	0	0	0	0	0
Rosellinia necatrix partitivirus 4	0	3.28908e-06	0	0	0	1.67708e-06	0	0	0	0
Halhan virus 3	0	0	0	0	0	0	0	0	0	4.92595e-06
Decapod penstyldensovirus 1	0	2.7409e-07	2.92583e-06	0	1.46979e-06	0	0	2.30231e-07	0	0
Sanxia sobemo-like virus 1	3.91917e-07	3.9743e-06	0	0	0	0	0	4.60463e-07	0	0
Beihai levi-like virus 23	0	0	0	0	1.46979e-06	3.35417e-06	0	0	0	0
Wenzhou tombus-like virus 11	3.13533e-06	0	0	0	0	1.67708e-06	0	0	0	0
Crimson clover cryptic virus 2	0	2.87794e-06	0	0	0	0	0	2.30231e-07	0	1.64198e-06
Solivirus sp.	0	1.37045e-07	0	0	2.93958e-06	0	0	2.30231e-07	0	0
Propionibacterium phage PacnesP2	3.91917e-07	0	0	0	1.46979e-06	0	0	2.30231e-06	0	0
Thrips-associated genomovirus 4	4.703e-06	0	0	0	0	0	0	0	0	0
Synechococcus phage S-IOM18	0	0	0	0	4.40937e-06	0	0	0	0	0
Pseudomonas phage phiPSA2	0	0	0	0	4.40937e-06	0	0	0	0	0
Dengue virus	0	0	0	0	4.40937e-06	0	0	0	0	0
Rabbit endogenous lentivirus type K	0	2.7409e-07	0	0	4.40937e-06	0	0	0	0	0
Xanthomonas citri phage CP2	0	0	0	0	0	0	0	0	0	0
Brucella phage BiPBO1	0	0	0	0	2.93958e-06	0	0	0	0	1.64198e-06
Vibrio phage eugene 12A10	0	1.37045e-07	0	0	4.40937e-06	0	0	0	0	0
Yongsan negev-like virus 1	4.31108e-06	1.37045e-07	0	0	0	0	0	0	0	0
Wuhan arthropod virus 2	0	3.9743e-06	0	0	0	0	0	4.60463e-07	0	0
Papiine alphaherpesvirus 2	3.91917e-07	0	1.09719e-06	0	2.93958e-06	0	0	0	0	0
Acinetobacter phage ABPH49	0	0	0	0	4.40937e-06	0	0	0	0	0
Klebsiella phage ZCKP1	0	0	0	0	4.40937e-06	0	0	0	0	0
Mycobacterium phage Myrna	0	0	0	0	4.40937e-06	0	0	0	0	0
Pseudoalteromonas phage PH357	0	0	0	0	4.40937e-06	0	0	0	0	0
Pseudomonas phage PhiPA3	0	0	0	0	4.40937e-06	0	0	0	0	0
Erwinia phage vB_EamM_EarlPhillipIV	0	0	0	0	4.40937e-06	0	0	0	0	0
Yersinia phage phiR8-01	0	0	0	0	4.40937e-06	0	0	0	0	0
Streptomyces phage phiSAJS1	0	0	0	0	4.40937e-06	0	0	0	0	0
Suid gammaherpesvirus 5	0	0	0	0	4.40937e-06	0	0	0	0	0
Cucumber mosaic virus	0	0	0	0	4.40937e-06	0	0	0	0	0
Luffa aphid-borne yellows virus	0	0	0	0	4.40937e-06	0	0	0	0	0
Changjiang levi-like virus 2	0	0	0	0	4.40937e-06	0	0	0	0	0
Betacoronavirus 1	0	0	0	0	4.40937e-06	0	0	0	0	0
Equine infectious anemia virus	0	0	0	0	4.40937e-06	0	0	0	0	0
Darwin bee virus 8	0	0	0	0	4.40937e-06	0	0	0	0	0
Hubei sobemo-like virus 47	0	0	4.38875e-06	0	0	0	0	0	0	0
Spider associated circular virus 1	0	2.87794e-06	0	0	1.46979e-06	0	0	0	0	0
Hubei tombus-like virus 1	0	0	0	0	1.46979e-06	0	0	2.76278e-06	0	0
Dyopipapillomavirus 1	1.95958e-06	0	2.19437e-06	0	0	0	0	0	0	0
Synechococcus phage S-RSM4	0	4.11135e-07	0	0	1.46979e-06	0	0	2.30231e-07	0	0
Beihai picorna-like virus 72	0	0	0	0	0	0	0	0	0	0
Posavirus 1	3.91917e-06	0	0	0	0	0	0	0	0	0
Wheat rosette stunt virus	0	0	7.31458e-07	0	0	0	0	0	0	0
Escherichia phage SRT7	0	1.37045e-07	0	0	2.93958e-06	0	0	2.30231e-07	0	0
Hubei toti-like virus 8	0	4.11135e-07	0	0	0	0	0	0	0	0
Sewage derived gemykibivirus 1	0	1.78158e-06	0	0	1.46979e-06	0	0	0	0	0
Curvibacter phage P26059B	0	1.37045e-07	7.31458e-07	0	2.93958e-06	0	0	0	0	0
Canine associated gemygorvirus 1	0	2.32976e-06	0	0	1.46979e-06	0	0	0	0	0
Mycobacterium virus Che9c	0	0	0	0	1.46979e-06	0	0	0	0	0
Streptomyces phage Wofford	0	0	0	0	1.46979e-06	0	0	0	0	0
Porcine circovirus 3	3.91917e-07	0	0	0	0	3.35417e-06	0	0	0	0
Sinorhizobium phage HMSP1-Susan	0	0	0	0	0	0	0	0	0	0
Sewage-associated circular Duc_viral virus-17	1.17575e-06	0	2.19437e-06	0	0	0	0	0	0	0
La Tardoire virus	0	1.37045e-07	0	0	0	0	0	2.30231e-07	0	3.28396e-06
Wuhan house centipede virus 7	0	0	0	0	0	3.35417e-06	0	0	0	0
Pseudomonas phage YMC11/06/C171_PPU_BP	0	4.11135e-07	0	0	0	0	0	0	0	0
Darwin bee virus 6	0	0	0	0	0	0	0	0	0	3.28396e-06
Xylella phage Sano	0	0	0	0	2.93958e-06	0	0	0	0	0
Microbacterium phage OneinaGillian	0	0	0	0	1.46979e-06	0	0	0	0	0
Boolarra virus	0	0	0	0	0	0	0	0	0	0
Citrus sudden death-associated virus	0	3.42612e-06	0	0	0	0	0	0	0	0
Escherichia phage BRET	0	0	0	0	0	3.35417e-06	0	0	0	0
Po-Circo-like virus 51	0	0	0	0	0	3.35417e-06	0	0	0	0
Apis mellifera associated microvirus 18	0	0	0	0	0	3.35417e-06	0	0	0	0
Bradson virus	0	0	0	0	0	3.35417e-06	0	0	0	0
Hubei partiti-like virus 29	0	0	0	0	0	3.35417e-06	0	0	0	0
Shahe narna-like virus 2	0	0	0	0	0	3.35417e-06	0	0	0	0
Frog virus 3	0	4.11135e-07	0	0	2.93958e-06	0	0	0	0	0
Hubei bunya-like virus 13	0	1.64454e-06	1.46292e-06	0	0	0	0	2.30231e-07	0	0
Visna-maedi virus	0	0	3.65729e-07	0	2.93958e-06	0	0	0	0	0
Human associated gemykibivirus 4	0	1.64454e-06	0	0	0	0	0	0	0	1.64198e-06
Cucurbit aphid-borne yellows virus	0	0	0	0	0	0	0	0	0	3.28396e-06
Hubei picorna-like virus 80	0	0	0	0	0	0	0	0	0	3.28396e-06
Sclerophthora macrospora virus A	0	0	0	0	0	0	0	0	0	3.28396e-06
Wuhan insect virus 13	0	0	0	0	0	0	0	0	0	3.28396e-06
Squirrel monkey retrovirus	0	0	0	0	0	0	0	0	0	3.28396e-06
Store beach virus	0	1.09636e-06	7.31458e-07	0	0	0	0	1.15116e-06	0	0
Tipula oleracea nudivirus	0	1.37045e-07	0	0	1.46979e-06	0	0	0	0	1.64198e-06
Lentinula edodes partitivirus 1	0	2.87794e-06	3.65729e-07	0	0	0	0	0	0	0
Human mastadenovirus D	0	0	0	0	2.93958e-06	0	0	0	0	0
Acanthamoeba castellanii medusavirus	0	0	0	0	2.93958e-06	0	0	0	0	0
Scale drop disease virus	0	0	0	0	1.46979e-06	0	0	0	0	0
Deftia phage phiW-14	0	0	0	0	2.93958e-06	0	0	2.30231e-07	0	0
Arthrobacter phage Sonali	0	0	0	0	0	0	0	0	0	0
Lynx canadensis faeces associated genomovirus CL1 46	0	0	0	0	0	0	0	0	0	0
Macropodid alphaherpesvirus 1	0	0	0	0	1.46979e-06	1.67708e-06	0	0	0	0
Ceratobasidium partitivirus-like	0	1.09636e-06	3.65729e-07	0	0	1.67708e-06	0	0	0	0
Bark beetle-associated genomovirus 1	3.13533e-06	0	0	0	0	0	0	0	0	0
Tubeweb spider associated circular virus 1	3.13533e-06	0	0	0	0	0	0	0	0	0
Penaeus vannamei nodavirus	0	1.64454e-06	0	0	1.46979e-06	0	0	0	0	0
Pseudomonas phage OBP	0	0	0	0	1.46979e-06	0	0	0	0	1.64198e-06
Xylella phage Paz	0	0	0	0	1.46979e-06	0	0	0	0	1.64198e-06
Streptomyces phage VWB	0	0	0	0	1.46979e-06	0	0	0	0	1.64198e-06
Eptesicus fuscus gammaherpesvirus	0	0	0	0	1.46979e-06	0	0	0	0	1.64198e-06
Acanthocystis turfacea Chlorella virus MN0810.1	0	0	0	0	1.46979e-06	0	0	0	0	1.64198e-06
Vibrio phage ValB1MD	1.95958e-06	0	0	0	0	0	0	0	0	0
Soybean associated gemycircularvirus 1	0	2.7409e-06	3.65729e-07	0	0	0	0	0	0	0
Clavibacter phage CN1A	0	1.37045e-07	0	0	2.93958e-06	0	0	0	0	0
Staphylococcus phage VB-SauS-SA2	0	1.37045e-07	0	0	2.93958e-06	0	0	0	0	0
Murid betaherpesvirus 1	0	1.37045e-07	0	0	2.93958e-06	0	0	0	0	0
Starling associated gemygorvirus 1	0	3.01499e-06	0	0	0	0	0	0	0	0
Beihai picorna-like virus 74	0	3.01499e-06	0	0	0	0	0	0	0	0
Avian endogenous retrovirus EAV-HP	0	0	0	0	0	0	0	2.99301e-06	0	0
Salmonella virus P22	1.17575e-06	4.11135e-07	0	0	0	0	0	2.30231e-07	0	0
Pseudomonas phage PPpW-3	0	0	0	0	2.93958e-06	0	0	0	0	0
Pseudomonas virus PaMx11	0	0	0	0	2.93958e-06	0	0	0	0	0
Microbacterium phage Hendrix	0	0	0	0	2.93958e-06	0	0	0	0	0
Microbacterium phage Quhwah	0	0	0	0	2.93958e-06	0	0	0	0	0
Mycobacterium phage Thonko	0	0	0	0	2.93958e-06	0	0	0	0	0
Staphylococcus phage IME1354_01	0	0	0	0	2.93958e-06	0	0	0	0	0
Streptomyces phage JustBecause	0	0	0	0	2.93958e-06	0	0	0	0	0
Streptomyces phage LazerLemon	0	0	0	0	2.93958e-06	0	0	0	0	0
Propionibacterium virus PHL112N00	0	0	0	0	2.93958e-06	0	0	0	0	0
Tomato leaf curl Joydebpur virus	0	0	0	0	2.93958e-06	0	0	0	0	0
Bovine serum-associated circular virus	0	0	0	0	2.93958e-06	0	0	0	0	0
Bradyrhizobium phage BDU-MI-1	0	0	0	0	2.93958e-06	0	0	0	0	0
Circovirus-like genome RW-B	0	0	0	0	2.93958e-06	0	0	0	0	0
False black widow spider associated circular virus 1	0	0	0	0	2.93958e-06	0	0	0	0	0
Andrena haemorrhoa nege-like virus	0	0	0	0	2.93958e-06	0	0	0	0	0
Alphapapillomavirus 12	0	0	0	0	2.93958e-06	0	0	0	0	0
Orpheovirus IHUMI-LCC2	0	0	0	0	2.93958e-06	0	0	0	0	0
Centropristis striata polyomavirus 1	0	0	0	0	2.93958e-06	0	0	0	0	0
Sweet potato virus G	0	0	0	0	2.93958e-06	0	0	0	0	0
St Croix River virus	0	0	0	0	2.93958e-06	0	0	0	0	0
Bovine associated cosmacovirus 1	0	0	0	0	2.93958e-06	0	0	0	0	0
Ball python nidovirus 1	0	0	0	0	2.93958e-06	0	0	0	0	0
Olive latent virus 3	0	0	0	0	2.93958e-06	0	0	0	0	0
Wenzhou pacific spadenose shark paramyxovirus	0	0	0	0	2.93958e-06	0	0	0	0	0
Hainan black-spectacled toad dimarhabdovirus	0	0	2.92583e-06	0	0	0	0	0	0	0
Propionibacterium virus Ouroboros	0	0	0	0	1.46979e-06	0	0	0	0	0
Ixodes scapularis associated virus 1	0	9.59315e-07	0	0	0	0	0	0	0	1.64198e-06
Synechococcus phage S-CBP42	0	0	0	0	0	0	0	0	0	0
Pseudomonas phage SM1	0	0	0	0	0	0	0	0	0	0
Thermus phage phiFa	0	0	0	0	0	0	0	0	0	0
Rodent circovirus	1.17575e-06	0	0	0	0	1.67708e-06	0	0	0	0
Barrevirus sp.	0	0	0	0	1.46979e-06	0	0	2.30231e-07	0	0
Pseudomonas phage VCM	0	0	0	0	0	0	0	0	0	1.64198e-06
Vibrio phage 1.133.O._10N.222.51.E4	0	0	0	0	0	0	0	0	0	1.64198e-06
Grapevine associated partitivirus-1	0	8.2227e-07	0	0	0	1.67708e-06	0	2.30231e-07	0	0
Human betaherpesvirus 6B	0	1.37045e-07	3.65729e-07	0	1.46979e-06	0	0	6.90694e-07	0	0
Arthrobacter phage MargaretKali	0	0	0	0	1.46979e-06	0	0	0	0	0
Pseudomonas phage GP100	0	1.37045e-07	0	0	0	0	0	4.60463e-07	0	0
Bovine associated gemykibivirus 1	0	2.60385e-06	0	0	0	0	0	0	0	0
Streptomyces phage NootNoot	0	0	0	0	0	0	0	0	0	0
Thermoanaerobacterium phage THSA-485A	0	0	0	0	0	0	0	0	0	0
Phaeocystis globosa virus	0	0	0	0	0	0	0	0	0	0
Equine associated gemycircularvirus 1	0	2.7409e-07	0	0	0	0	0	0	0	0
Termite associated circular virus 2	0	5.4818e-07	3.65729e-07	0	0	0	0	0	0	1.64198e-06
Hubei sobemo-like virus 13	0	0	0	0	0	0	0	2.53255e-06	0	0
Acidovorax phage ACP17	0	1.37045e-07	3.65729e-07	0	0	0	0	0	0	0
Ruegeria phage vB_RpoP-V13	0	0	0	0	0	0	0	0	0	1.64198e-06
Hubei partiti-like virus 23	2.3515e-06	1.37045e-07	0	0	0	0	0	0	0	0
Panine betaherpesvirus 2	7.83833e-07	0	1.46292e-06	0	0	0	0	2.30231e-07	0	0
unidentified circular ssDuc_viral virus	7.83833e-07	0	0	0	0	1.67708e-06	0	0	0	0
Cyclovirus sp.	7.83833e-07	0	1.09719e-06	0	0	0	0	0	0	0
Microbacterium phage RobsFeet	0	9.59315e-07	0	0	1.46979e-06	0	0	0	0	0
Oat blue dwarf virus	0	9.59315e-07	0	0	1.46979e-06	0	0	0	0	0
Molossus molossus circovirus 2	7.83833e-07	0	7.31458e-07	0	0	0	0	0	0	0
Microbacterium phage Metamorphoo	0	1.78158e-06	3.65729e-07	0	0	0	0	2.30231e-07	0	0
Gordonia phage GMA5	0	6.85225e-07	0	0	0	1.67708e-06	0	0	0	0
Partitivirus-like 2	0	0	0	0	1.46979e-06	0	0	0	0	0
Micromonas pusilla virus 12T	0	0	0	0	1.46979e-06	0	0	0	0	0
Fur seal associated gemycircularvirus 1	0	2.32976e-06	0	0	0	0	0	0	0	0
Cybaeus spider associated circular virus 2	0	2.32976e-06	0	0	0	0	0	0	0	0
Providencia phage vB PstP PS3	0	0	0	0	0	0	0	0	0	0
Cronobacter phage vB_CskP_GAP227	0	0	0	0	0	0	0	0	0	0
Wenling sobemo-like virus 1	0	1.37045e-07	0	0	1.46979e-06	0	0	6.90694e-07	0	0
Dragonfly associated gemyduguivirus 1	0	8.2227e-07	0	0	1.46979e-06	0	0	0	0	0
Hubei partiti-like virus 22	0	8.2227e-07	0	0	1.46979e-06	0	0	0	0	0
Mamastrovirus 3	0	0	0	0	0	1.67708e-06	0	0	0	0
Euphorbia heterophylla associated gemycircularvirus	0	2.19272e-06	0	0	0	0	0	0	0	0
Barley yellow dwarf virus PAS	0	2.19272e-06	0	0	0	0	0	0	0	0
Pseudomonas phage Phabio	0	0	0	0	0	0	0	4.60463e-07	0	0
Common bottlenose dolphin gammaherpesvirus 1 strain Sarasota	0	0	3.65729e-07	0	1.46979e-06	0	0	0	0	0
Pleurotus ostreatus virus 1	0	1.64454e-06	0	0	0	0	0	4.60463e-07	0	0
Cucumber green mottle mosaic virus	0	0	0	0	0	0	0	2.07208e-06	0	0
Badger associated gemykibivirus 1	0	2.05567e-06	0	0	0	0	0	0	0	0
Serratia phage PS2	0	0	0	0	1.46979e-06	0	0	0	0	0
Mycobacterium phage Pollywog	0	0	0	0	1.46979e-06	0	0	0	0	0
Salmonella phage St162	0	0	0	0	1.46979e-06	0	0	0	0	0
Ctenophore-associated circular genome 3	0	0	3.65729e-07	0	0	1.67708e-06	0	0	0	0
Bee iflavirus 1	0	0	3.65729e-07	0	0	0	0	2.30231e-07	0	0
Spodoptera exigua iflavirus 2	0	5.4818e-07	0	0	1.46979e-06	0	0	0	0	0
Pseudomonas phage PPSC2	0	0	0	0	0	0	0	0	0	0
Ralstonia phage RsoP1EGY	0	0	0	0	0	0	0	0	0	0
Streptomyces phage WRightOn	0	0	0	0	0	0	0	0	0	0
Tick-associated genomovirus 1	0	0	0	0	0	0	0	0	0	0
Vibrio phage LP.2	0	0	0	0	0	0	0	0	0	0
Diabrotica virgifera virgifera virus 3	0	1.78158e-06	0	0	0	0	0	2.30231e-07	0	0
Porcine associated porprismacovirus 10	0	1.78158e-06	0	0	0	0	0	2.30231e-07	0	0
Mason-Pfizer monkey virus	0	0	3.65729e-07	0	0	0	0	0	0	1.64198e-06
Suid alphaherpesvirus 1	0	0	0	0	1.46979e-06	0	0	2.30231e-07	0	0
Porcine astrovirus 4	0	5.4818e-07	0	0	0	0	0	0	0	0
Delftia phage IME-DE1	0	0	0	0	0	1.67708e-06	0	0	0	0
Avon-Heathcote Estuary associated circular virus 4	0	0	0	0	0	1.67708e-06	0	0	0	0
Acaryochloris phage A-HIS2	0	0	0	0	0	0	0	2.30231e-07	0	0
Bovine papular stomatitis virus	0	2.7409e-07	0	0	0	1.67708e-06	0	0	0	0
Yam latent virus	0	2.7409e-07	0	0	0	1.67708e-06	0	0	0	0
Rhinolophus associated gemykibivirus 1	0	1.64454e-06	0	0	0	0	0	0	0	0
Cyprinid herpesvirus 3	0	0	0	0	1.46979e-06	0	0	4.60463e-07	0	0
Acinetobacter phage RL-2015	0	0	0	0	0	0	0	0	0	1.64198e-06
North shore virus	0	0	0	0	0	0	0	0	0	1.64198e-06
Acanthocystis turfacea Chlorella virus NE-JV-2	0	0	0	0	0	0	0	0	0	1.64198e-06
Diadegma fenestrale ichnovirus	0	0	0	0	0	0	0	0	0	1.64198e-06
Chicken associated gemycircularvirus 1	0	1.91863e-06	0	0	0	0	0	0	0	0
Lepus americanus faeces associated genomovirus SHP216	0	1.91863e-06	0	0	0	0	0	0	0	0
Humaita-Tubiacanga virus	0	1.91863e-06	0	0	0	0	0	0	0	0
Paracoccus phage Shpa	0	1.37045e-07	0	0	1.46979e-06	0	0	0	0	0
Vibrio phage SHOU24	0	1.37045e-07	0	0	1.46979e-06	0	0	0	0	0
Burkholderia phage AH2	0	0	3.65729e-07	0	1.46979e-06	0	0	0	0	0
Bovine alphaherpesvirus 5	0	0	3.65729e-07	0	1.46979e-06	0	0	0	0	0
Avian metapneumovirus	0	0	3.65729e-07	0	1.46979e-06	0	0	0	0	0
Hubei insect virus 1	0	1.37045e-07	0	0	0	1.67708e-06	0	0	0	0
Escherichia virus Lambda	0	0	3.65729e-07	0	0	0	0	0	0	0
Mycobacterium phage Zetzy	0	1.78158e-06	0	0	0	0	0	0	0	0
Hubei partiti-like virus 32	0	1.37045e-07	0	0	0	0	0	0	0	1.64198e-06
Sanxia water strider virus 18	0	1.37045e-07	0	0	0	0	0	0	0	1.64198e-06
Erwinia virus Asesino	0	0	0	0	1.46979e-06	0	0	0	0	0
Vibrio virus VP882	0	0	0	0	1.46979e-06	0	0	0	0	0
Sphingomonas phage PAU	0	0	0	0	1.46979e-06	0	0	0	0	0
Burkholderia phage JG068	0	0	0	0	1.46979e-06	0	0	0	0	0
Phage MedPE-SWcel-C56	0	0	0	0	1.46979e-06	0	0	0	0	0
Pseudomonas virus PaMx28	0	0	0	0	1.46979e-06	0	0	0	0	0
Beluga whale alphaherpesvirus 1	0	0	0	0	1.46979e-06	0	0	0	0	0
Turkey aviadenovirus B	0	0	0	0	1.46979e-06	0	0	0	0	0
Dromedary stool-associated circular ssDuc_viral virus	0	0	0	0	1.46979e-06	0	0	0	0	0
Vibrio phage 1.178.O._10N.286.45.E12	0	0	0	0	1.46979e-06	0	0	0	0	0
Betapapillomavirus 1	0	0	0	0	1.46979e-06	0	0	0	0	0
Acanthocystis turfacea chlorella virus 1	0	0	0	0	1.46979e-06	0	0	0	0	0
Achromobacter phage phiAxp-2	0	2.7409e-07	0	0	1.46979e-06	0	0	0	0	0
Canine vesivirus	0	2.7409e-07	0	0	1.46979e-06	0	0	0	0	0
Pacific flying fox faeces associated gemycircularvirus-8	0	2.7409e-07	0	0	1.46979e-06	0	0	0	0	0
Abelson murine leukemia virus	0	2.7409e-07	0	0	1.46979e-06	0	0	0	0	0
Cronobacter phage CR5	0	0	0	0	0	0	0	0	0	0
Arthrobacter virus Circum	0	0	0	0	0	0	0	0	0	0
Lynx canadensis faeces associated genomovirus CL3 128	0	0	0	0	0	0	0	0	0	0
Changjiang tombus-like virus 7	0	0	0	0	0	0	0	0	0	0
Ostreococcus lucimarinus virus OlV3	0	0	0	0	0	0	0	0	0	0
Alphaarterivirus equid	0	0	0	0	0	0	0	0	0	0
Saccharomonospora phage PIS 136	0	0	0	0	1.46979e-06	0	0	2.30231e-07	0	0
Murid betaherpesvirus 2	0	0	0	0	1.46979e-06	0	0	2.30231e-07	0	0
Tupaiid betaherpesvirus 1	0	0	0	0	1.46979e-06	0	0	2.30231e-07	0	0
Feline immunodeficiency virus	0	0	0	0	1.46979e-06	0	0	2.30231e-07	0	0
Grapevine fanleaf virus	0	0	0	0	1.46979e-06	0	0	2.30231e-07	0	0
Avon-Heathcote Estuary associated circular virus 2	0	0	0	0	0	1.67708e-06	0	0	0	0
Giant house spider associated circular virus 2	0	0	0	0	0	1.67708e-06	0	0	0	0
Gorebridge virus	0	0	0	0	0	1.67708e-06	0	0	0	0
Pacific flying fox faeces associated circular Duc_viral virus-4	0	0	0	0	0	1.67708e-06	0	0	0	0
Corn snake parvovirus	0	0	0	0	0	1.67708e-06	0	0	0	0
Porcine partetravirus	0	0	0	0	0	1.67708e-06	0	0	0	0
Porcine partetravirus JSLH70	0	0	0	0	0	1.67708e-06	0	0	0	0
Parvovirus 4-like MK-2012	0	0	0	0	0	1.67708e-06	0	0	0	0
Ungulate tetraparvovirus 4	0	0	0	0	0	1.67708e-06	0	0	0	0
Fly wubeivirus	0	0	0	0	0	1.67708e-06	0	0	0	0
Porton's virus	0	0	0	0	0	1.67708e-06	0	0	0	0
Nocardia phage NTR1	0	0	7.31458e-07	0	0	0	0	9.20926e-07	0	0
Pteropus associated gemycircularvirus 4	0	1.64454e-06	0	0	0	0	0	0	0	0
Bat dicistrovirus	0	1.64454e-06	0	0	0	0	0	0	0	0
Renmark bee virus 1	0	1.64454e-06	0	0	0	0	0	0	0	0
Escherichia virus vB_Eco_mar005P1	0	0	0	0	0	0	0	0	0	1.64198e-06
Pseudomonas phage VSW-3	0	0	0	0	0	0	0	0	0	1.64198e-06
Citrobacter phage CR44b	0	0	0	0	0	0	0	0	0	1.64198e-06
Arthrobacter virus Joann	0	0	0	0	0	0	0	0	0	1.64198e-06
Mycobacterium virus Skipole	0	0	0	0	0	0	0	0	0	1.64198e-06
Enterobacteria phage IME_EC2	0	0	0	0	0	0	0	0	0	1.64198e-06
Staphylococcus virus EW	0	0	0	0	0	0	0	0	0	1.64198e-06
SEN virus	0	0	0	0	0	0	0	0	0	1.64198e-06
Mamastrovirus 19	0	0	0	0	0	0	0	0	0	1.64198e-06
Ruddy turnstone calicivirus A	0	0	0	0	0	0	0	0	0	1.64198e-06
Kama virus	0	0	0	0	0	0	0	0	0	1.64198e-06
Escherichia virus Qbeta	0	0	0	0	0	0	0	0	0	1.64198e-06
Hubei tombus-like virus 13	0	0	0	0	0	0	0	0	0	1.64198e-06
Phytophthora parasitica virus	0	0	0	0	0	0	0	0	0	1.64198e-06
Thermus phage phiKo	0	0	0	0	0	0	0	0	0	1.64198e-06
Rhizoctonia solani ourmia-like virus 1 Ruc_viral 1	0	0	0	0	0	0	0	0	0	1.64198e-06
Partitivirus-like 3	0	0	0	0	0	0	0	0	0	1.64198e-06
Sodiomyces alkalinus partitivirus 1	0	0	0	0	0	0	0	0	0	1.64198e-06
Bovine foamy virus	0	0	0	0	0	0	0	0	0	1.64198e-06
Formica exsecta virus 2	0	0	0	0	0	0	0	0	0	1.64198e-06
Robinvale bee virus 2	0	0	0	0	0	0	0	0	0	1.64198e-06
Grapevine virus B	0	0	0	0	0	0	0	0	0	1.64198e-06
Sosuga rubulavirus	0	0	0	0	0	0	0	0	0	1.64198e-06
Momordica charantia associated gemycircularvirus	3.91917e-07	1.2334e-06	0	0	0	0	0	0	0	0
Lymantria dispar multiple nucleopolyhedrovirus	0	1.37045e-07	0	0	1.46979e-06	0	0	0	0	0
Atypical porcine pestivirus	0	1.37045e-07	0	0	1.46979e-06	0	0	0	0	0
Cotton leaf curl Multan virus	0	1.37045e-07	0	0	1.46979e-06	0	0	0	0	0
Beihai picorna-like virus 84	0	1.37045e-07	0	0	1.46979e-06	0	0	0	0	0
Hubei sobemo-like virus 12	0	1.37045e-07	0	0	1.46979e-06	0	0	0	0	0
Decronivirus 1	0	1.37045e-07	0	0	1.46979e-06	0	0	0	0	0
Tomato yellow fruit ring virus	0	1.37045e-07	0	0	1.46979e-06	0	0	0	0	0
Bat gammaretrovirus	0	2.7409e-07	0	0	0	0	0	4.60463e-07	0	0
Drosophila innubila nudivirus	0	1.37045e-07	0	0	0	0	0	0	0	0
Pectobacterium phage My1	0	0	3.65729e-07	0	0	0	0	0	0	0
Arthrobacter phage Colucci	0	0	0	0	1.46979e-06	0	0	0	0	0
Escherichia phage vB_EcoM_ECOO78	0	0	0	0	1.46979e-06	0	0	0	0	0
Staphylococcus phage pSco-10	0	0	0	0	1.46979e-06	0	0	0	0	0
Klebsiella phage JD001	0	0	0	0	1.46979e-06	0	0	0	0	0
Escherichia phage vB_vPM_PD06	0	0	0	0	1.46979e-06	0	0	0	0	0
Gordonia phage Gray	0	0	0	0	1.46979e-06	0	0	0	0	0
Klebsiella phage 1611E-K2-1	0	0	0	0	1.46979e-06	0	0	0	0	0
Shewanella sp. phage 1/40	0	0	0	0	1.46979e-06	0	0	0	0	0
Synechococcus phage S-CAM9	0	0	0	0	1.46979e-06	0	0	0	0	0
Xanthomonas phage KPhi1	0	0	0	0	1.46979e-06	0	0	0	0	0
Pseudomonas phage SL1	0	0	0	0	1.46979e-06	0	0	0	0	0
Vibrio virus KVP40	0	0	0	0	1.46979e-06	0	0	0	0	0
Aurantimonas phage AmM-1	0	0	0	0	1.46979e-06	0	0	0	0	0
Streptomyces phage Manuel	0	0	0	0	1.46979e-06	0	0	0	0	0
Vibrio phage JSF7	0	0	0	0	1.46979e-06	0	0	0	0	0
Yersinia phage fPS-59	0	0	0	0	1.46979e-06	0	0	0	0	0
Pseudomonas phage phikF77	0	0	0	0	1.46979e-06	0	0	0	0	0
Pseudomonas virus LKA1	0	0	0	0	1.46979e-06	0	0	0	0	0
Escherichia phage LL11	0	0	0	0	1.46979e-06	0	0	0	0	0
Pectobacterium phage POP72	0	0	0	0	1.46979e-06	0	0	0	0	0
Escherichia phage vB_EcoP_S523	0	0	0	0	1.46979e-06	0	0	0	0	0
T7-like bacteriophage Eptesicus fuscus/P1/IT/USA/2009	0	0	0	0	1.46979e-06	0	0	0	0	0
Escherichia phage Gluttony	0	0	0	0	1.46979e-06	0	0	0	0	0
Arthrobacter phage Oxynfrius	0	0	0	0	1.46979e-06	0	0	0	0	0
Mycobacterium phage Sheen	0	0	0	0	1.46979e-06	0	0	0	0	0
Mycobacterium phage MOOREtheMARYer	0	0	0	0	1.46979e-06	0	0	0	0	0
Bacillus phage Carmen17	0	0	0	0	1.46979e-06	0	0	0	0	0
Bacteroides phage B124-14	0	0	0	0	1.46979e-06	0	0	0	0	0
Caulobacter phage CcrBL9	0	0	0	0	1.46979e-06	0	0	0	0	0
Caulobacter phage Seuss	0	0	0	0	1.46979e-06	0	0	0	0	0
Corynebacterium phage phi673	0	0	0	0	1.46979e-06	0	0	0	0	0
Corynebacterium phage phi674	0	0	0	0	1.46979e-06	0	0	0	0	0
Escherichia phage Skarpretter	0	0	0	0	1.46979e-06	0	0	0	0	0
Gordonia phage Bibwit	0	0	0	0	1.46979e-06	0	0	0	0	0
Gordonia phage Ghobes	0	0	0	0	1.46979e-06	0	0	0	0	0
Gordonia phage Jumbo	0	0	0	0	1.46979e-06	0	0	0	0	0
Gordonia phage Vasanti	0	0	0	0	1.46979e-06	0	0	0	0	0
Lactobacillus phage CL2	0	0	0	0	1.46979e-06	0	0	0	0	0
Lactococcus phage P092	0	0	0	0	1.46979e-06	0	0	0	0	0
Microbacterium phage Min1	0	0	0	0	1.46979e-06	0	0	0	0	0
Providencia phage vB_PreS_PR1	0	0	0	0	1.46979e-06	0	0	0	0	0
Pseudoalteromonas phage B8b	0	0	0	0	1.46979e-06	0	0	0	0	0
Pseudoalteromonas phage Pq0	0	0	0	0	1.46979e-06	0	0	0	0	0
Shewanella sp. phage 1/44	0	0	0	0	1.46979e-06	0	0	0	0	0
Staphylococcus phage phiRS7	0	0	0	0	1.46979e-06	0	0	0	0	0
Streptococcus phage phi3396	0	0	0	0	1.46979e-06	0	0	0	0	0
Streptomyces phage Raleigh	0	0	0	0	1.46979e-06	0	0	0	0	0
Streptomyces phage Sebastisaurus	0	0	0	0	1.46979e-06	0	0	0	0	0
Streptomyces phage StarPlatinum	0	0	0	0	1.46979e-06	0	0	0	0	0
Streptomyces phage Yara	0	0	0	0	1.46979e-06	0	0	0	0	0
Vibrio phage jenny 12G5	0	0	0	0	1.46979e-06	0	0	0	0	0
Propionibacterium phage Supernova	0	0	0	0	1.46979e-06	0	0	0	0	0
Propionibacterium virus PHL116M00	0	0	0	0	1.46979e-06	0	0	0	0	0
Propionibacterium virus Pirate	0	0	0	0	1.46979e-06	0	0	0	0	0
Streptomyces virus phiBT1	0	0	0	0	1.46979e-06	0	0	0	0	0
Caulobacter virus Rogue	0	0	0	0	1.46979e-06	0	0	0	0	0
Gordonia phage Bantam	0	0	0	0	1.46979e-06	0	0	0	0	0
Escherichia phage vB_EcoS_SH2	0	0	0	0	1.46979e-06	0	0	0	0	0
Ictalurid herpesvirus 1	0	0	0	0	1.46979e-06	0	0	0	0	0
Callitrichine gammaherpesvirus 3	0	0	0	0	1.46979e-06	0	0	0	0	0
Anatid alphaherpesvirus 1	0	0	0	0	1.46979e-06	0	0	0	0	0
Phascolarctid gammaherpesvirus 1	0	0	0	0	1.46979e-06	0	0	0	0	0
Ateline alphaherpesvirus 1	0	0	0	0	1.46979e-06	0	0	0	0	0
Bovine alphaherpesvirus 2	0	0	0	0	1.46979e-06	0	0	0	0	0
Duck atadenovirus A	0	0	0	0	1.46979e-06	0	0	0	0	0
Pigeon aviadenovirus A	0	0	0	0	1.46979e-06	0	0	0	0	0
Simian mastadenovirus D	0	0	0	0	1.46979e-06	0	0	0	0	0
Tree shrew mastadenovirus A	0	0	0	0	1.46979e-06	0	0	0	0	0
Torque teno virus 8	0	0	0	0	1.46979e-06	0	0	0	0	0
Torque teno virus	0	0	0	0	1.46979e-06	0	0	0	0	0
Choristoneura fumiferana DEF multiple nucleopolyhedrovirus	0	0	0	0	1.46979e-06	0	0	0	0	0
Cyclophragma undans nucleopolyhedrovirus	0	0	0	0	1.46979e-06	0	0	0	0	0
Lambdina fiscellaria nucleopolyhedrovirus	0	0	0	0	1.46979e-06	0	0	0	0	0
Spodoptera litura nucleopolyhedrovirus	0	0	0	0	1.46979e-06	0	0	0	0	0
Mythimna unipuncta granulovirus B	0	0	0	0	1.46979e-06	0	0	0	0	0
Spodoptera frugiperda granulovirus	0	0	0	0	1.46979e-06	0	0	0	0	0
Duck circovirus	0	0	0	0	1.46979e-06	0	0	0	0	0
Ceratobasidium endornavirus H	0	0	0	0	1.46979e-06	0	0	0	0	0
Pegivirus D	0	0	0	0	1.46979e-06	0	0	0	0	0
Porcine pegivirus	0	0	0	0	1.46979e-06	0	0	0	0	0
Pestivirus B	0	0	0	0	1.46979e-06	0	0	0	0	0
Begomovirus sp. CR-2004	0	0	0	0	1.46979e-06	0	0	0	0	0
Cotton leaf curl Burewala virus	0	0	0	0	1.46979e-06	0	0	0	0	0
Ludwigia yellow vein virus	0	0	0	0	1.46979e-06	0	0	0	0	0
Sugarcane streak virus	0	0	0	0	1.46979e-06	0	0	0	0	0
Tokyovirus A1	0	0	0	0	1.46979e-06	0	0	0	0	0
Alternaria alternata virus 1	0	0	0	0	1.46979e-06	0	0	0	0	0
Beihai charybdis crab virus 1	0	0	0	0	1.46979e-06	0	0	0	0	0
Changjiang tombus-like virus 5	0	0	0	0	1.46979e-06	0	0	0	0	0
Hubei sobemo-like virus 10	0	0	0	0	1.46979e-06	0	0	0	0	0
Hubei virga-like virus 23	0	0	0	0	1.46979e-06	0	0	0	0	0
Klebsiella phage Kund-ULIP47	0	0	0	0	1.46979e-06	0	0	0	0	0
Saiwaicho virus	0	0	0	0	1.46979e-06	0	0	0	0	0
Shahe picorna-like virus 7	0	0	0	0	1.46979e-06	0	0	0	0	0
Thermus phage phiMa	0	0	0	0	1.46979e-06	0	0	0	0	0
Vibrio phage 1.052.A._10N.286.46.C3	0	0	0	0	1.46979e-06	0	0	0	0	0
Vibrio phage 1.256.O._10N.286.45.F8	0	0	0	0	1.46979e-06	0	0	0	0	0
Virus Rctr41k	0	0	0	0	1.46979e-06	0	0	0	0	0
Wenzhou levi-like virus 4	0	0	0	0	1.46979e-06	0	0	0	0	0
Wenzhou narna-like virus 4	0	0	0	0	1.46979e-06	0	0	0	0	0
environmental Halophage eHP-14	0	0	0	0	1.46979e-06	0	0	0	0	0
environmental Halophage eHP-3	0	0	0	0	1.46979e-06	0	0	0	0	0
uncultured phage MedDCM-OCT-S05-C139	0	0	0	0	1.46979e-06	0	0	0	0	0
uncultured phage MedDCM-OCT-S08-C159	0	0	0	0	1.46979e-06	0	0	0	0	0
Cronartium ribicola mitovirus 5	0	0	0	0	1.46979e-06	0	0	0	0	0
Marsupenaeus japonicus endogenous nimavirus	0	0	0	0	1.46979e-06	0	0	0	0	0
Bos taurus papillomavirus 16	0	0	0	0	1.46979e-06	0	0	0	0	0
Taupapillomavirus 1	0	0	0	0	1.46979e-06	0	0	0	0	0
Orthopteran densovirus 1	0	0	0	0	1.46979e-06	0	0	0	0	0
Only Syngen Nebraska virus 5	0	0	0	0	1.46979e-06	0	0	0	0	0
Paramecium bursaria Chlorella virus NE-JV-1	0	0	0	0	1.46979e-06	0	0	0	0	0
Ectocarpus siliculosus virus 1	0	0	0	0	1.46979e-06	0	0	0	0	0
Feldmannia species virus	0	0	0	0	1.46979e-06	0	0	0	0	0
Pigeonpox virus	0	0	0	0	1.46979e-06	0	0	0	0	0
Chimpanzee associated porprismacovirus 2	0	0	0	0	1.46979e-06	0	0	0	0	0
Streptomyces phage WheeHeim	0	0	0	0	1.46979e-06	0	0	0	0	0
Larkfield virus	0	0	0	0	1.46979e-06	0	0	0	0	0
Coniothyrium minitans Ruc_viral virus	0	0	0	0	1.46979e-06	0	0	0	0	0
Rodent arterivirus	0	0	0	0	1.46979e-06	0	0	0	0	0
Wuhan japanese halfbeak arterivirus	0	0	0	0	1.46979e-06	0	0	0	0	0
Alphamesonivirus 1	0	0	0	0	1.46979e-06	0	0	0	0	0
Ovine enzootic nasal tumor virus	0	0	0	0	1.46979e-06	0	0	0	0	0
Bovine leukemia virus	0	0	0	0	1.46979e-06	0	0	0	0	0
Jembrana disease virus	0	0	0	0	1.46979e-06	0	0	0	0	0
Graminella nigrifrons virus 1	0	0	0	0	1.46979e-06	0	0	0	0	0
Zygocactus virus X	0	0	0	0	1.46979e-06	0	0	0	0	0
Phlox virus B	0	0	0	0	1.46979e-06	0	0	0	0	0
Sweet potato chlorotic fleck virus	0	0	0	0	1.46979e-06	0	0	0	0	0
Apricot latent virus	0	0	0	0	1.46979e-06	0	0	0	0	0
Panicum virus	0	0	0	0	1.46979e-06	0	0	0	0	0
Insect shangavirus	0	0	0	0	1.46979e-06	0	0	0	0	0
Ekpoma 1 tibrovirus	0	0	0	0	1.46979e-06	0	0	0	0	0
Fruit bat alphaherpesvirus 1	0	0	1.46292e-06	0	0	0	0	0	0	0
Rhodobacter phage RcNL1	0	0	1.46292e-06	0	0	0	0	0	0	0
Cronobacter virus PBES02	0	0	0	0	0	0	0	0	0	0
Erwinia phage vB_EamM_Yoloswag	0	0	0	0	0	0	0	0	0	0
Prochlorococcus phage P-HM2	0	0	0	0	0	0	0	0	0	0
Synechococcus virus S-PRM1	0	0	0	0	0	0	0	0	0	0
Klebsiella phage KP8	0	0	0	0	0	0	0	0	0	0
Pectobacterium phage Jarilo	0	0	0	0	0	0	0	0	0	0
Gordonia phage Margaret	0	0	0	0	0	0	0	0	0	0
Propionibacterium phage QueenBey	0	0	0	0	0	0	0	0	0	0
Murine roseolovirus	0	0	0	0	0	0	0	0	0	0
Bovine associated gemycircularvirus 1	0	0	0	0	0	0	0	0	0	0
Halovirus HVTV-1	0	0	0	0	0	0	0	0	0	0
Wenzhou levi-like virus 7	0	0	0	0	0	0	0	0	0	0
Enterobacteria phage IME10	0	0	1.09719e-06	0	0	0	0	0	0	0
Mycobacterium phage Squirty	0	0	1.09719e-06	0	0	0	0	0	0	0
Lepus americanus faeces associated genomovirus SHP9	0	1.09636e-06	0	0	0	0	0	0	0	0
Propionibacterium virus P101A	0	0	0	0	0	0	0	1.38139e-06	0	0
Beihai noda-like virus 29	0	1.37045e-06	0	0	0	0	0	0	0	0
Chuvirus Mos8Chu0	0	1.37045e-06	0	0	0	0	0	0	0	0
Botrytis cinerea partitivirus 1	0	1.37045e-06	0	0	0	0	0	0	0	0
Black queen cell virus	0	1.37045e-06	0	0	0	0	0	0	0	0
Myrmica scabrinodis virus 1	0	1.37045e-06	0	0	0	0	0	0	0	0
Columbid alphaherpesvirus 1	3.91917e-07	0	0	0	0	0	0	6.90694e-07	0	0
Lake Sarah-associated circular virus-36	7.83833e-07	0	0	0	0	0	0	0	0	0
Rosellinia necatrix virus 1	7.83833e-07	5.4818e-07	0	0	0	0	0	0	0	0
Bee Macula-like virus	0	1.09636e-06	0	0	0	0	0	2.30231e-07	0	0
Stipagrostis associaed virus	0	0	7.31458e-07	0	0	0	0	0	0	0
Pseudomonas phage pf16	0	1.37045e-07	0	0	0	0	0	0	0	0
Lama associated gemycircularvirus 1	3.91917e-07	0	0	0	0	0	0	0	0	0
Hubei virga-like virus 22	0	1.2334e-06	0	0	0	0	0	0	0	0
Cercopithecine betaherpesvirus 5	0	0	3.65729e-07	0	0	0	0	2.30231e-07	0	0
Cyanophage S-RIM12	0	4.11135e-07	0	0	0	0	0	4.60463e-07	0	0
Ralstonia phage RP12	0	0	0	0	0	0	0	0	0	0
Synechococcus phage ACG-2014h	0	0	0	0	0	0	0	0	0	0
Pseudomonas virus PB1	0	0	0	0	0	0	0	0	0	0
uncultured cyanobacterial podovirus	0	0	0	0	0	0	0	0	0	0
Escherichia phage P AB-2017	0	0	0	0	0	0	0	0	0	0
Pseudomonas phage KPP23	0	0	0	0	0	0	0	0	0	0
Streptomyces phage UNTPL	0	0	0	0	0	0	0	0	0	0
Vibrio phage pYD21-A	0	0	0	0	0	0	0	0	0	0
Equid alphaherpesvirus 1	0	0	0	0	0	0	0	0	0	0
Torque teno sus virus k2a	0	0	0	0	0	0	0	0	0	0
Circoviridae 1 LDMD-2013	0	0	0	0	0	0	0	0	0	0
Porcine feces-associated gemycircularvirus	0	0	0	0	0	0	0	0	0	0
Marseillevirus Shanghai 1	0	0	0	0	0	0	0	0	0	0
Diporeia sp. associated circular virus	0	0	0	0	0	0	0	0	0	0
Giant house spider associated circular virus 4	0	0	0	0	0	0	0	0	0	0
uncultured Mediterranean phage uvDeep-CGR2-KM24-C26	0	0	0	0	0	0	0	0	0	0
uncultured aquatic phage	0	0	0	0	0	0	0	0	0	0
Prymnesium parvum Duc_viral virus BW1	0	0	0	0	0	0	0	0	0	0
Okra mosaic virus	0	2.7409e-07	0	0	0	0	0	0	0	0
Primula malacoides virus 1	0	8.2227e-07	0	0	0	0	0	0	0	0
Arthrobacter phage Cheesy	0	0	1.09719e-06	0	0	0	0	0	0	0
Culex negev-like virus 1	0	1.09636e-06	0	0	0	0	0	0	0	0
Pararge aegeria rhabdovirus	0	1.09636e-06	0	0	0	0	0	0	0	0
Cronobacter phage vB_CsaM_leE	3.91917e-07	0	0	0	0	0	0	6.90694e-07	0	0
Euprosterna elaeasa virus	3.91917e-07	6.85225e-07	0	0	0	0	0	0	0	0
Shuangao insect virus 8	3.91917e-07	6.85225e-07	0	0	0	0	0	0	0	0
Vaccinia virus	0	1.37045e-07	0	0	0	0	0	9.20926e-07	0	0
Hubei macula-like virus 1	0	8.2227e-07	0	0	0	0	0	2.30231e-07	0	0
Circovirus-like genome DCCV-1	3.91917e-07	0	3.65729e-07	0	0	0	0	0	0	0
Vibrio phage 1.185.O._10N.286.49.C2	0	0	0	0	0	0	0	4.60463e-07	0	0
Flock House virus	0	5.4818e-07	0	0	0	0	0	4.60463e-07	0	0
Cyanophage S-CBP1	0	1.37045e-07	0	0	0	0	0	0	0	0
Xanthomonas phage XAJ2	0	1.37045e-07	0	0	0	0	0	0	0	0
Mosquito densovirus HB-3	0	0	0	0	0	0	0	6.90694e-07	0	0
Monkeypox virus	0	0	0	0	0	0	0	6.90694e-07	0	0
Barns Ness breadcrumb sponge sobemo-like virus 2	0	1.37045e-07	3.65729e-07	0	0	0	0	4.60463e-07	0	0
Escherichia phage SRT8	0	9.59315e-07	0	0	0	0	0	0	0	0
Hubei mosquito virus 1	0	9.59315e-07	0	0	0	0	0	0	0	0
Salarivirus Mos8CM0	0	9.59315e-07	0	0	0	0	0	0	0	0
Cannabis cryptic virus	0	9.59315e-07	0	0	0	0	0	0	0	0
Human betaherpesvirus 6	0	0	3.65729e-07	0	0	0	0	0	0	0
Bacillus virus Finn	0	0	0	0	0	0	0	9.20926e-07	0	0
Hubei noda-like virus 22	0	6.85225e-07	0	0	0	0	0	2.30231e-07	0	0
Wuhan house centipede virus 4	0	5.4818e-07	3.65729e-07	0	0	0	0	0	0	0
Wuhan Spider Virus	0	5.4818e-07	3.65729e-07	0	0	0	0	0	0	0
Aeromonas phage Ah1	0	0	0	0	0	0	0	0	0	0
Synechococcus phage S-CBWM1	0	0	0	0	0	0	0	0	0	0
Agrobacterium phage Atu_ph02	0	0	0	0	0	0	0	0	0	0
Cellulophaga phage phi18:3	0	0	0	0	0	0	0	0	0	0
Lactococcus phage asccphi28	0	0	0	0	0	0	0	0	0	0
Pantoea virus Limezero	0	0	0	0	0	0	0	0	0	0
Morganella phage vB_MmoP_MP2	0	0	0	0	0	0	0	0	0	0
Pectobacterium phage PP81	0	0	0	0	0	0	0	0	0	0
Cellulophaga virus Cba121	0	0	0	0	0	0	0	0	0	0
Streptomyces virus Hydra	0	0	0	0	0	0	0	0	0	0
Arthrobacter phage Elesar	0	0	0	0	0	0	0	0	0	0
Arthrobacter phage Faja	0	0	0	0	0	0	0	0	0	0
Streptomyces phage Mildred21	0	0	0	0	0	0	0	0	0	0
Streptomyces phage Mojorita	0	0	0	0	0	0	0	0	0	0
Salmonella phage 64795_sal3	0	0	0	0	0	0	0	0	0	0
Burkholderia virus KL1	0	0	0	0	0	0	0	0	0	0
Hubei noda-like virus 21	0	0	0	0	0	0	0	0	0	0
Hubei partiti-like virus 16	0	0	0	0	0	0	0	0	0	0
Skeletonema virus LDF-2015a	0	0	0	0	0	0	0	0	0	0
Vibrio phage VspDsh_1	0	0	0	0	0	0	0	0	0	0
Wuhan coneheads virus 1	0	0	0	0	0	0	0	0	0	0
uncultured Mediterranean phage uvDeep-CGR0-AD1-C123	0	0	0	0	0	0	0	0	0	0
uncultured phage MedDCM-OCT-S08-C41	0	0	0	0	0	0	0	0	0	0
Ostreococcus tauri virus RT-2011	0	0	0	0	0	0	0	0	0	0
Sclerotinia sclerotiorum umbra-like virus 2	0	0	0	0	0	0	0	0	0	0
Qinghai Lake virophage	0	2.7409e-07	0	0	0	0	0	0	0	0
Sewage derived gemycircularvirus 1	0	8.2227e-07	0	0	0	0	0	0	0	0
Hubei picorna-like virus 35	0	8.2227e-07	0	0	0	0	0	0	0	0
Macrobrachium rosenbergii nodavirus	0	8.2227e-07	0	0	0	0	0	0	0	0
Acinetobacter phage AM24	0	0	0	0	0	0	0	2.30231e-07	0	0
Sewage derived gemykibivirus 2	3.91917e-07	4.11135e-07	0	0	0	0	0	0	0	0
Chicken stool-associated gemycircularvirus	7.83833e-07	0	0	0	0	0	0	0	0	0
Braid Burn virus	7.83833e-07	0	0	0	0	0	0	0	0	0
Eulipotyphla protoparvovirus 1	7.83833e-07	0	0	0	0	0	0	0	0	0
Hubei sobemo-like virus 11	0	5.4818e-07	0	0	0	0	0	2.30231e-07	0	0
Dicistroviridae SC4317	0	5.4818e-07	0	0	0	0	0	2.30231e-07	0	0
Turnip mosaic virus	3.91917e-07	0	3.65729e-07	0	0	0	0	0	0	0
Maize-associated picornavirus	3.91917e-07	0	3.65729e-07	0	0	0	0	0	0	0
Beihai sobemo-like virus 26	0	2.7409e-07	0	0	0	0	0	4.60463e-07	0	0
Escherichia virus mEpX2	0	0	7.31458e-07	0	0	0	0	0	0	0
Spodoptera littoralis nucleopolyhedrovirus	0	0	7.31458e-07	0	0	0	0	0	0	0
Hubei sobemo-like virus 22	0	0	7.31458e-07	0	0	0	0	0	0	0
Vibrio phage 1.034.O._10N.261.46.B7	0	0	7.31458e-07	0	0	0	0	0	0	0
Rice yellow mottle virus	0	0	7.31458e-07	0	0	0	0	0	0	0
Grenada mosquito rhabdovirus 1	0	0	7.31458e-07	0	0	0	0	0	0	0
Mythimna unipuncta nucleopolyhedrovirus	0	1.37045e-07	0	0	0	0	0	0	0	0
Apis mellifera associated microvirus 4	0	1.37045e-07	0	0	0	0	0	0	0	0
Hubei partiti-like virus 3	0	1.37045e-07	0	0	0	0	0	0	0	0
Bat cripavirus	0	1.37045e-07	0	0	0	0	0	0	0	0
Enterovirus A	0	4.11135e-07	0	0	0	0	0	0	0	0
Phormidium phage MIS-PhV1B	0	0	0	0	0	0	0	6.90694e-07	0	0
Micromonas pusilla virus SP1	0	0	0	0	0	0	0	6.90694e-07	0	0
Rice ragged stunt virus	0	0	0	0	0	0	0	6.90694e-07	0	0
Yersinia virus L413C	0	6.85225e-07	0	0	0	0	0	0	0	0
Pteropus associated gemycircularvirus 2	0	6.85225e-07	0	0	0	0	0	0	0	0
Bark beetle-associated genomovirus 5	0	6.85225e-07	0	0	0	0	0	0	0	0
Turkeypox virus	0	6.85225e-07	0	0	0	0	0	0	0	0
Escherichia virus HK022	3.91917e-07	0	0	0	0	0	0	0	0	0
Spodoptera eridania nucleopolyhedrovirus	3.91917e-07	0	0	0	0	0	0	0	0	0
Aguacate virus	3.91917e-07	2.7409e-07	0	0	0	0	0	0	0	0
Achromobacter virus Axp3	0	0	3.65729e-07	0	0	0	0	0	0	0
Pectobacterium phage PPWS1	0	0	3.65729e-07	0	0	0	0	0	0	0
Vibrio phage vB_VpaS_KF6	0	0	3.65729e-07	0	0	0	0	0	0	0
Namao virus	3.91917e-07	0	0	0	0	0	0	2.30231e-07	0	0
Beihai sobemo-like virus 21	0	1.37045e-07	0	0	0	0	0	4.60463e-07	0	0
Morganella phage MmP1	0	0	3.65729e-07	0	0	0	0	2.30231e-07	0	0
Alphapapillomavirus 4	0	0	3.65729e-07	0	0	0	0	2.30231e-07	0	0
Sinorhizobium virus N3	0	0	0	0	0	0	0	0	0	0
Synechococcus phage S-WAM1	0	0	0	0	0	0	0	0	0	0
Pseudomonas phage Bjorn	0	0	0	0	0	0	0	0	0	0
Agrobacterium phage Atu_ph03	0	0	0	0	0	0	0	0	0	0
Cyanophage KBS-P-1A	0	0	0	0	0	0	0	0	0	0
Dickeya phage BF25/12	0	0	0	0	0	0	0	0	0	0
Enterobacteria phage K11	0	0	0	0	0	0	0	0	0	0
Escherichia phage P694	0	0	0	0	0	0	0	0	0	0
Ralstonia phage RSB2	0	0	0	0	0	0	0	0	0	0
Mycobacterium phage Frankie	0	0	0	0	0	0	0	0	0	0
Moraxella phage Mcat9	0	0	0	0	0	0	0	0	0	0
Streptococcus phage SpSL1	0	0	0	0	0	0	0	0	0	0
Escherichia virus 9g	0	0	0	0	0	0	0	0	0	0
Thermus virus P23-45	0	0	0	0	0	0	0	0	0	0
Lactococcus phage 936 sensu lato	0	0	0	0	0	0	0	0	0	0
Gordonia phage Lozinak	0	0	0	0	0	0	0	0	0	0
Human mastadenovirus C	0	0	0	0	0	0	0	0	0	0
Avon-Heathcote Estuary associated circular virus 27	0	0	0	0	0	0	0	0	0	0
Avon-Heathcote Estuary associated circular virus 5	0	0	0	0	0	0	0	0	0	0
Digitaria didactyla striate mosaic virus	0	0	0	0	0	0	0	0	0	0
Bark beetle associated circular virus 1	0	0	0	0	0	0	0	0	0	0
Dasosvirus sp.	0	0	0	0	0	0	0	0	0	0
Hubei virga-like virus 18	0	0	0	0	0	0	0	0	0	0
Penicillium brevicompactum ssRuc_viral virus 1	0	0	0	0	0	0	0	0	0	0
Botrytis ourmia-like virus	0	0	0	0	0	0	0	0	0	0
Tomelloso virus	0	0	0	0	0	0	0	0	0	0
Dipteran ambidensovirus 1	0	0	0	0	0	0	0	0	0	0
Acanthocystis turfacea Chlorella virus Canal-1	0	0	0	0	0	0	0	0	0	0
Pseudomonas virus PR4	0	0	0	0	0	0	0	0	0	0
Bemisia-associated dicistrovirus 1	0	0	0	0	0	0	0	0	0	0
Xincheng anphevirus	0	0	0	0	0	0	0	0	0	0
Wuhan tick virus 2	0	0	0	0	0	0	0	0	0	0
Stenotrophomonas phage IME15	0	2.7409e-07	0	0	0	0	0	0	0	0
Lactobacillus phage LfeSau	0	5.4818e-07	0	0	0	0	0	0	0	0
Anthurium mosaic-associated virus	0	5.4818e-07	0	0	0	0	0	0	0	0
Cotton leaf curl Kokhran virus	0	5.4818e-07	0	0	0	0	0	0	0	0
Sweet potato leaf curl virus	0	5.4818e-07	0	0	0	0	0	0	0	0
Canine feces-associated gemycircularvirus	0	5.4818e-07	0	0	0	0	0	0	0	0
Mongoose associated gemykibivirus 1	0	5.4818e-07	0	0	0	0	0	0	0	0
Hop trefoil cryptic virus 2	0	5.4818e-07	0	0	0	0	0	0	0	0
Salmon gill poxvirus	0	5.4818e-07	0	0	0	0	0	0	0	0
Barns Ness beadlet anemone sobemo-like virus 1	0	5.4818e-07	0	0	0	0	0	0	0	0
Guangxi changeable lizard picornavirus 1	0	5.4818e-07	0	0	0	0	0	0	0	0
Wenling jack mackerels picornavirus	0	5.4818e-07	0	0	0	0	0	0	0	0
Menghai rhabdovirus	0	5.4818e-07	0	0	0	0	0	0	0	0
Mosquito associated gemycircularvirus 1	3.91917e-07	1.37045e-07	0	0	0	0	0	0	0	0
Pseudomonas phage Achelous	0	0	0	0	0	0	0	2.30231e-07	0	0
Lone star tick associated virus-1	0	0	0	0	0	0	0	2.30231e-07	0	0
Dipteran brevidensovirus 2	0	0	0	0	0	0	0	2.30231e-07	0	0
Alphacoronavirus 1	0	0	0	0	0	0	0	2.30231e-07	0	0
Vibrio phage 1.245.O._10N.261.54.C7	0	2.7409e-07	0	0	0	0	0	2.30231e-07	0	0
Hubei tetragnatha maxillosa virus 6	0	1.37045e-07	3.65729e-07	0	0	0	0	0	0	0
Riverside virus 1	0	1.37045e-07	3.65729e-07	0	0	0	0	0	0	0
Synechococcus virus Syn5	0	0	0	0	0	0	0	4.60463e-07	0	0
Acinetobacter phage vB_AbaS_Loki	0	0	0	0	0	0	0	4.60463e-07	0	0
Bacillus phage pW2	0	0	0	0	0	0	0	4.60463e-07	0	0
Hubei tombus-like virus 2	0	0	0	0	0	0	0	4.60463e-07	0	0
Hardy-Zuckerman feline sarcoma virus	0	0	0	0	0	0	0	4.60463e-07	0	0
Bark beetle-associated genomovirus 3	0	1.37045e-07	0	0	0	0	0	0	0	0
Sanxia sobemo-like virus 4	0	1.37045e-07	0	0	0	0	0	0	0	0
Shuangao Fly Virus 1	0	1.37045e-07	0	0	0	0	0	0	0	0
uncultured Mediterranean phage uvDeep-CGR0-AD1-C239	0	1.37045e-07	0	0	0	0	0	0	0	0
Chikungunya virus	0	1.37045e-07	0	0	0	0	0	0	0	0
Enterobacteria phage phiEcoM-GJ1	0	4.11135e-07	0	0	0	0	0	0	0	0
Mycobacterium phage Mendokysei	0	4.11135e-07	0	0	0	0	0	0	0	0
Mycobacterium phage Florinda	0	4.11135e-07	0	0	0	0	0	0	0	0
Pantoea phage vB_PagS_AAS23	0	4.11135e-07	0	0	0	0	0	0	0	0
Propionibacterium phage PFR2	0	4.11135e-07	0	0	0	0	0	0	0	0
Saimiriine gammaherpesvirus 2	0	4.11135e-07	0	0	0	0	0	0	0	0
Giant panda circovirus 4	0	4.11135e-07	0	0	0	0	0	0	0	0
Dragonfly associated gemykibivirus 1	0	4.11135e-07	0	0	0	0	0	0	0	0
Giant house spider associated circular virus 1	0	4.11135e-07	0	0	0	0	0	0	0	0
Thrips-associated genomovirus 2	0	4.11135e-07	0	0	0	0	0	0	0	0
Apis mellifera associated microvirus 5	0	4.11135e-07	0	0	0	0	0	0	0	0
Beihai shrimp virus 5	0	4.11135e-07	0	0	0	0	0	0	0	0
Culex mononega-like virus 2	0	4.11135e-07	0	0	0	0	0	0	0	0
Hubei noda-like virus 11	0	4.11135e-07	0	0	0	0	0	0	0	0
Hubei permutotetra-like virus 11	0	4.11135e-07	0	0	0	0	0	0	0	0
Hubei sobemo-like virus 15	0	4.11135e-07	0	0	0	0	0	0	0	0
Alphapapillomavirus 2	0	4.11135e-07	0	0	0	0	0	0	0	0
Epsilonpapillomavirus 1	0	4.11135e-07	0	0	0	0	0	0	0	0
Desmodus rotundus dependoparvovirus	0	4.11135e-07	0	0	0	0	0	0	0	0
Tama virus	0	4.11135e-07	0	0	0	0	0	0	0	0
Bat coronavirus	0	4.11135e-07	0	0	0	0	0	0	0	0
Antarctic picorna-like virus 1	0	4.11135e-07	0	0	0	0	0	0	0	0
Linepithema humile polycipivirus 1	0	4.11135e-07	0	0	0	0	0	0	0	0
Ononis yellow mosaic virus	0	4.11135e-07	0	0	0	0	0	0	0	0
Helicobacter phage PtB89G	3.91917e-07	0	0	0	0	0	0	0	0	0
Caulobacter phage Ccr5	3.91917e-07	0	0	0	0	0	0	0	0	0
Spodoptera exigua multiple nucleopolyhedrovirus	3.91917e-07	0	0	0	0	0	0	0	0	0
Diatraea saccharalis granulovirus	3.91917e-07	0	0	0	0	0	0	0	0	0
European catfish circovirus	3.91917e-07	0	0	0	0	0	0	0	0	0
Farfantepenaeus duorarum circovirus	3.91917e-07	0	0	0	0	0	0	0	0	0
Circoviridae 19 LDMD-2013	3.91917e-07	0	0	0	0	0	0	0	0	0
Fiddler Crab associated circular virus	3.91917e-07	0	0	0	0	0	0	0	0	0
Edge Hill virus	3.91917e-07	0	0	0	0	0	0	0	0	0
Hypericum associated gemycircularvirus 1	3.91917e-07	0	0	0	0	0	0	0	0	0
Mallard associated gemycircularvirus 1	3.91917e-07	0	0	0	0	0	0	0	0	0
Escherichia virus MS2	3.91917e-07	0	0	0	0	0	0	0	0	0
Golden Marseillevirus	3.91917e-07	0	0	0	0	0	0	0	0	0
Lake Sarah-associated circular virus-34	3.91917e-07	0	0	0	0	0	0	0	0	0
Vibrio phage 1.046.O._10N.286.52.E3	3.91917e-07	0	0	0	0	0	0	0	0	0
Wenzhou crab virus 4	3.91917e-07	0	0	0	0	0	0	0	0	0
uncultured archaeal virus	3.91917e-07	0	0	0	0	0	0	0	0	0
Anseriform dependoparvovirus 1	3.91917e-07	0	0	0	0	0	0	0	0	0
Thaumetopoea pityocampa iflavirus 1	3.91917e-07	0	0	0	0	0	0	0	0	0
Raspberry ringspot virus	3.91917e-07	0	0	0	0	0	0	0	0	0
Butterbur mosaic virus	3.91917e-07	0	0	0	0	0	0	0	0	0
Beihai picorna-like virus 116	0	1.37045e-07	0	0	0	0	0	2.30231e-07	0	0
Plantago asiatica mosaic virus	0	1.37045e-07	0	0	0	0	0	2.30231e-07	0	0
Bangoran virus	0	1.37045e-07	0	0	0	0	0	2.30231e-07	0	0
Arthrobacter phage KBurrousTX	0	0	3.65729e-07	0	0	0	0	0	0	0
Rhodococcus phage E3	0	0	3.65729e-07	0	0	0	0	0	0	0
Mycobacterium phage Cookies	0	0	3.65729e-07	0	0	0	0	0	0	0
Propionibacterium virus Stormborn	0	0	3.65729e-07	0	0	0	0	0	0	0
Bordetella phage FP1	0	0	3.65729e-07	0	0	0	0	0	0	0
Myotis gammaherpesvirus 8	0	0	3.65729e-07	0	0	0	0	0	0	0
Persea americana chrysovirus	0	0	3.65729e-07	0	0	0	0	0	0	0
Air potato virus 1	0	0	3.65729e-07	0	0	0	0	0	0	0
Alfuy virus	0	0	3.65729e-07	0	0	0	0	0	0	0
Barns Ness breadcrumb sponge hepe-like virus 4	0	0	3.65729e-07	0	0	0	0	0	0	0
Wenling samurai squirrelfish hepevirus	0	0	3.65729e-07	0	0	0	0	0	0	0
CrAssphage sp.	0	0	3.65729e-07	0	0	0	0	0	0	0
Pacific flying fox faeces associated circular Duc_viral virus-3	0	0	3.65729e-07	0	0	0	0	0	0	0
Sewage-associated circular Duc_viral virus-12	0	0	3.65729e-07	0	0	0	0	0	0	0
Subterranean clover stunt virus	0	0	3.65729e-07	0	0	0	0	0	0	0
Dyoiotapapillomavirus 2	0	0	3.65729e-07	0	0	0	0	0	0	0
Primate bocaparvovirus 1	0	0	3.65729e-07	0	0	0	0	0	0	0
Pteronotus parnellii polyomavirus 1	0	0	3.65729e-07	0	0	0	0	0	0	0
Bat polyomavirus	0	0	3.65729e-07	0	0	0	0	0	0	0
Adoxophyes honmai entomopoxvirus	0	0	3.65729e-07	0	0	0	0	0	0	0
Lebombo virus	0	0	3.65729e-07	0	0	0	0	0	0	0
Gill-associated virus	0	0	3.65729e-07	0	0	0	0	0	0	0
Simian retrovirus 4	0	0	3.65729e-07	0	0	0	0	0	0	0
Murine osteosarcoma virus	0	0	3.65729e-07	0	0	0	0	0	0	0
Araguari virus	0	0	3.65729e-07	0	0	0	0	0	0	0
Bat Paramyxovirus Hip_gig/GB09682/GAB/2009	0	0	3.65729e-07	0	0	0	0	0	0	0
Marco hapavirus	0	0	3.65729e-07	0	0	0	0	0	0	0
Bacillus virus Agate	0	0	0	0	0	0	0	0	0	0
Arthrobacter phage Chubster	0	0	0	0	0	0	0	0	0	0
Burkholderia virus Bcep1	0	0	0	0	0	0	0	0	0	0
Cronobacter phage Pet-CM3-4	0	0	0	0	0	0	0	0	0	0
Bacillus virus CP51	0	0	0	0	0	0	0	0	0	0
Enterobacter phage Arya	0	0	0	0	0	0	0	0	0	0
Acinetobacter phage vB_AbaM_ME3	0	0	0	0	0	0	0	0	0	0
Pseudomonas phage PaBG	0	0	0	0	0	0	0	0	0	0
Pseudomonas phage vB_PsyM_KIL1	0	0	0	0	0	0	0	0	0	0
Rhodothermus phage RM378	0	0	0	0	0	0	0	0	0	0
Synechococcus phage ACG-2014e	0	0	0	0	0	0	0	0	0	0
Synechococcus phage S-RIM8	0	0	0	0	0	0	0	0	0	0
Xanthomonas phage vB_XveM_DIBBI	0	0	0	0	0	0	0	0	0	0
uncultured cyanomyovirus	0	0	0	0	0	0	0	0	0	0
Pseudomonas phage vB_PaeM_LCK69	0	0	0	0	0	0	0	0	0	0
Aeromonas virus Aes12	0	0	0	0	0	0	0	0	0	0
Staphylococcus virus SEP1	0	0	0	0	0	0	0	0	0	0
Bacillus phage Belinda	0	0	0	0	0	0	0	0	0	0
Klebsiella phage vB_KpnP_BIS33	0	0	0	0	0	0	0	0	0	0
Klebsiella phage vB_KpnP_KpV767	0	0	0	0	0	0	0	0	0	0
Klebsiella virus SU503	0	0	0	0	0	0	0	0	0	0
Shigella phage SFN6B	0	0	0	0	0	0	0	0	0	0
Citrobacter phage CVT22	0	0	0	0	0	0	0	0	0	0
Cronobacter phage Dev-CD-23823	0	0	0	0	0	0	0	0	0	0
Cyanophage 9515-10a	0	0	0	0	0	0	0	0	0	0
Cyanophage uc_viralTL1A-7	0	0	0	0	0	0	0	0	0	0
Cyanophage uc_viralTL2A-133	0	0	0	0	0	0	0	0	0	0
Erwinia phage vB_EamP-S6	0	0	0	0	0	0	0	0	0	0
Escherichia phage PGN829.1	0	0	0	0	0	0	0	0	0	0
Prochlorococcus virus PSSP7	0	0	0	0	0	0	0	0	0	0
Pseudomonas phage Littlefix	0	0	0	0	0	0	0	0	0	0
Pseudomonas phage Skulduggery	0	0	0	0	0	0	0	0	0	0
Ralstonia phage RSB1	0	0	0	0	0	0	0	0	0	0
Synechococcus virus P60	0	0	0	0	0	0	0	0	0	0
Yersinia phage fPS-54-ocr	0	0	0	0	0	0	0	0	0	0
uncultured bacterial podovirus	0	0	0	0	0	0	0	0	0	0
Proteus phage VB_PmiS-Isfahan	0	0	0	0	0	0	0	0	0	0
Escherichia phage ECBP5	0	0	0	0	0	0	0	0	0	0
Lelliottia phage phD2B	0	0	0	0	0	0	0	0	0	0
Escherichia phage LL2	0	0	0	0	0	0	0	0	0	0
Escherichia phage vB_EcoP_GA2A	0	0	0	0	0	0	0	0	0	0
Kluyvera virus Kvp1	0	0	0	0	0	0	0	0	0	0
Pseudomonas virus WRT	0	0	0	0	0	0	0	0	0	0
Cellulophaga virus ST	0	0	0	0	0	0	0	0	0	0
Mycobacterium phage Ovechkin	0	0	0	0	0	0	0	0	0	0
Mycobacterium phage MooMoo	0	0	0	0	0	0	0	0	0	0
Mycobacterium virus Hawkeye	0	0	0	0	0	0	0	0	0	0
Streptomyces virus Caliburn	0	0	0	0	0	0	0	0	0	0
Actinoplanes phage phiAsp2	0	0	0	0	0	0	0	0	0	0
Gordonia phage Angelique	0	0	0	0	0	0	0	0	0	0
Gordonia phage Blueberry	0	0	0	0	0	0	0	0	0	0
Gordonia phage Sour	0	0	0	0	0	0	0	0	0	0
Listonella phage phiHSIC	0	0	0	0	0	0	0	0	0	0
Mycobacterium phage Renaud18	0	0	0	0	0	0	0	0	0	0
Streptomyces phage Moozy	0	0	0	0	0	0	0	0	0	0
Streptomyces phage mu1/6	0	0	0	0	0	0	0	0	0	0
Thermus phage G20c	0	0	0	0	0	0	0	0	0	0
Propionibacterium phage DrParker	0	0	0	0	0	0	0	0	0	0
Propionibacterium phage PHL030N00	0	0	0	0	0	0	0	0	0	0
Propionibacterium phage pa35	0	0	0	0	0	0	0	0	0	0
Propionibacterium virus MrAK	0	0	0	0	0	0	0	0	0	0
Propionibacterium virus PHL095N00	0	0	0	0	0	0	0	0	0	0
Propionibacterium virus PHL141N00	0	0	0	0	0	0	0	0	0	0
Caulobacter virus Swift	0	0	0	0	0	0	0	0	0	0
Cyprinid herpesvirus 1	0	0	0	0	0	0	0	0	0	0
Bovine gammaherpesvirus 6	0	0	0	0	0	0	0	0	0	0
Equid gammaherpesvirus 2	0	0	0	0	0	0	0	0	0	0
Elephant endotheliotropic herpesvirus 5	0	0	0	0	0	0	0	0	0	0
Fowl aviadenovirus A	0	0	0	0	0	0	0	0	0	0
Bovine mastadenovirus B	0	0	0	0	0	0	0	0	0	0
Dolphin mastadenovirus B	0	0	0	0	0	0	0	0	0	0
Simian mastadenovirus I	0	0	0	0	0	0	0	0	0	0
Avian nephritis virus	0	0	0	0	0	0	0	0	0	0
Chrysodeixis includens nucleopolyhedrovirus	0	0	0	0	0	0	0	0	0	0
Ageratum latent virus	0	0	0	0	0	0	0	0	0	0
Fathead minnow calicivirus	0	0	0	0	0	0	0	0	0	0
Labidocera aestiva circovirus	0	0	0	0	0	0	0	0	0	0
Mungbean yellow mosaic India virus	0	0	0	0	0	0	0	0	0	0
South African cassava mosaic virus	0	0	0	0	0	0	0	0	0	0
Mongoose associated gemycircularvirus 1	0	0	0	0	0	0	0	0	0	0
Ostrich associated gemytondvirus 1	0	0	0	0	0	0	0	0	0	0
Sogatella furcifera hepe-like virus	0	0	0	0	0	0	0	0	0	0
Melbournevirus	0	0	0	0	0	0	0	0	0	0
Apis mellifera associated microvirus 1	0	0	0	0	0	0	0	0	0	0
Gokushovirinae GNX3R	0	0	0	0	0	0	0	0	0	0
Beihai tombus-like virus 6	0	0	0	0	0	0	0	0	0	0
Chronic bee paralysis virus	0	0	0	0	0	0	0	0	0	0
Dishui lake virophage 1	0	0	0	0	0	0	0	0	0	0
Dragonfly larvae associated circular virus-1	0	0	0	0	0	0	0	0	0	0
Hubei chuvirus-like virus 4	0	0	0	0	0	0	0	0	0	0
Hubei partiti-like virus 14	0	0	0	0	0	0	0	0	0	0
Hubei partiti-like virus 55	0	0	0	0	0	0	0	0	0	0
Hubei rhabdo-like virus 8	0	0	0	0	0	0	0	0	0	0
Lake Sarah-associated circular virus-19	0	0	0	0	0	0	0	0	0	0
Lake Sarah-associated circular virus-9	0	0	0	0	0	0	0	0	0	0
Sclerotinia sclerotiorum tetramycovirus-1	0	0	0	0	0	0	0	0	0	0
Synechoccus phage S-B43	0	0	0	0	0	0	0	0	0	0
Thermobifida phage P318	0	0	0	0	0	0	0	0	0	0
Vespa velutina Ruc_viral virus 3	0	0	0	0	0	0	0	0	0	0
Vibrio phage 1.103.O._10N.261.52.F2	0	0	0	0	0	0	0	0	0	0
Vibrio phage 1.216.O._10N.222.55.C12	0	0	0	0	0	0	0	0	0	0
Vibrio phage YC	0	0	0	0	0	0	0	0	0	0
Wenzhou Crab Virus 2	0	0	0	0	0	0	0	0	0	0
Wuhan insect virus 20	0	0	0	0	0	0	0	0	0	0
Yellowstone Lake virophage 5	0	0	0	0	0	0	0	0	0	0
uncultured Mediterranean phage uvDeep-CGR2-AD10-C281	0	0	0	0	0	0	0	0	0	0
uncultured Mediterranean phage uvDeep-CGR2-AD8-C175	0	0	0	0	0	0	0	0	0	0
uncultured Mediterranean phage uvDeep-CGR2-KM18-C269	0	0	0	0	0	0	0	0	0	0
uncultured Mediterranean phage uvDeep1-CGR2-KM23-C896	0	0	0	0	0	0	0	0	0	0
uncultured phage MedDCM-OCT-S08-C233	0	0	0	0	0	0	0	0	0	0
Densovirus SC444	0	0	0	0	0	0	0	0	0	0
Ungulate bocaparvovirus 4	0	0	0	0	0	0	0	0	0	0
Adeno-associated virus	0	0	0	0	0	0	0	0	0	0
Paramecium bursaria Chlorella virus CZ-2	0	0	0	0	0	0	0	0	0	0
Emiliania huxleyi virus 84	0	0	0	0	0	0	0	0	0	0
Pomona leaf-nosed bat associated polyomavirus	0	0	0	0	0	0	0	0	0	0
Tarumizu tick virus	0	0	0	0	0	0	0	0	0	0
Rotavirus A	0	0	0	0	0	0	0	0	0	0
Pseudomonas virus PRD1	0	0	0	0	0	0	0	0	0	0
Alphacoronavirus Bat-CoV/P.kuhlii/Italy/206645-41/2011	0	0	0	0	0	0	0	0	0	0
Cacao swollen shoot virus	0	0	0	0	0	0	0	0	0	0
Equine foamy virus	0	0	0	0	0	0	0	0	0	0
Koala retrovirus	0	0	0	0	0	0	0	0	0	0
Bovine immunodeficiency virus	0	0	0	0	0	0	0	0	0	0
Guangdong chinese water snake picornavirus	0	0	0	0	0	0	0	0	0	0
Kairi orthobunyavirus	0	0	0	0	0	0	0	0	0	0
Bovine fever ephemerovirus	0	0	0	0	0	0	0	0	0	0
Klebsiella phage vB_KpnM_KpV52	0	2.7409e-07	0	0	0	0	0	0	0	0
Plesiomonas phage phiP4-7	0	2.7409e-07	0	0	0	0	0	0	0	0
uncultured podovirus	0	2.7409e-07	0	0	0	0	0	0	0	0
Bacillus virus B103	0	2.7409e-07	0	0	0	0	0	0	0	0
Gallid alphaherpesvirus 1	0	2.7409e-07	0	0	0	0	0	0	0	0
Autographa californica multiple nucleopolyhedrovirus	0	2.7409e-07	0	0	0	0	0	0	0	0
Human associated cyclovirus 8	0	2.7409e-07	0	0	0	0	0	0	0	0
Hepacivirus D	0	2.7409e-07	0	0	0	0	0	0	0	0
Chickpea yellow dwarf virus	0	2.7409e-07	0	0	0	0	0	0	0	0
Poaceae associated gemycircularvirus 1	0	2.7409e-07	0	0	0	0	0	0	0	0
Alces alces faeces associated genomovirus MP111	0	2.7409e-07	0	0	0	0	0	0	0	0
Apis mellifera associated microvirus 60	0	2.7409e-07	0	0	0	0	0	0	0	0
Apis mellifera associated microvirus 61	0	2.7409e-07	0	0	0	0	0	0	0	0
Beihai mantis shrimp virus 6	0	2.7409e-07	0	0	0	0	0	0	0	0
Diabrotica virgifera virgifera virus 1	0	2.7409e-07	0	0	0	0	0	0	0	0
Hubei picorna-like virus 66	0	2.7409e-07	0	0	0	0	0	0	0	0
Sanxia water strider virus 12	0	2.7409e-07	0	0	0	0	0	0	0	0
[truncated: 193 more rows]
